# Supplementary material for: Highly diastereoselective construction of novel dispiropyrrolo[2,1-a]isoquinoline derivativesviamulticomponent 1,3-dipolar cycloaddition of cyclic diketones-based tetrahydroisoquinoliniumN-ylides
Source: Royal Society of Chemistry journal article supplement (doi:10.1039/c8ra09884k), 2019-01-01
Supplement: c8ra09884k1.pdf [file c8ra09884k1.pdf]

## Highly diastereoselective construction of novel dispiropyrrolo[2,1-a]isoquinoline derivatives *via* multicomponent 1,3-dipolar cycloaddition of cyclic diketones-based tetrahydroisoquinolinium *N*-ylides

Sarra Boudriga,<sup>a,\*</sup> Saoussen Haddad,<sup>a</sup> Moheddine Askri,<sup>a,\*</sup> Armand Soldera,<sup>b</sup> Michael Knorr,<sup>c</sup> Carsten Strohmann,<sup>d</sup> Christopher Golz<sup>d</sup>

<sup>a</sup> *Laboratory of Heterocyclic Chemistry Natural Products and Reactivity/CHPNR, Department of Chemistry, Faculty of Science of Monastir, 5000 Monastir, Tunisia. E-mail: moheddine.askri@fsm.rnu.tn; Tel: +216 98676187*

<sup>b</sup> *Institute UTINAM - UMR CNRS 6213, University of Franche-Comté, 16 Route de Gray, F-25030 Besançon, France.*

<sup>c</sup> *Technische Universität Dortmund, Anorganische Chemie Otto-Hahn-Strasse 6, 44221 Dortmund (Germany)*

### Supporting information

| Table of contents                                                                                                                                                                                                                       | Page       |
|-----------------------------------------------------------------------------------------------------------------------------------------------------------------------------------------------------------------------------------------|------------|
| 1 DFT data                                                                                                                                                                                                                              | page 2     |
| 2 Cartesian coordinates and energies for <b>1a</b> , <i>syn-d</i> <sub>2b</sub> , <i>exo-TS1</i> , <i>endo-TS1</i> , <i>exo-TS2</i> , <i>endo-TS2</i> , <b>4f</b> , <b>4'f</b> , <b>5f</b> and <b>5'f</b> at the B3LYP/6-31G(d,p) level | page 2-17  |
| 3 Experimental Section                                                                                                                                                                                                                  | page 18    |
| 3.1. General procedure for the preparation of cycloadducts <b>4–5</b>                                                                                                                                                                   |            |
| 3.2 Spectra data of synthesized compounds <b>4a-r</b> and <b>5a-r</b>                                                                                                                                                                   | page 18-23 |
| 3.3 <sup>1</sup> H- and <sup>13</sup> C-NMR Spectra of compounds <b>4a-r</b> and <b>5a-r</b> (Fig. S1 to S58)                                                                                                                           | page 24-52 |

## 1. DFT data

**Table S1.** HOMO/LUMO energies, global electrophilicity, electronic chemical potential, chemical hardness of the species, electronegativity and index of reactants (in eV) calculated at the B3LYP/6-31G(d,p) level

|                           | HOMO   | LUMO   | $\mu$  | X     | $\eta$ | $\omega$ | N     |
|---------------------------|--------|--------|--------|-------|--------|----------|-------|
| <b>syn-d<sub>2a</sub></b> | -0,211 | -0,077 | -3,921 | 3,921 | 3,624  | 2,121    | 4.423 |
| <b>1a</b>                 | -0,244 | -0,075 | -4,343 | 4,343 | 4,595  | 2,052    | 2.479 |

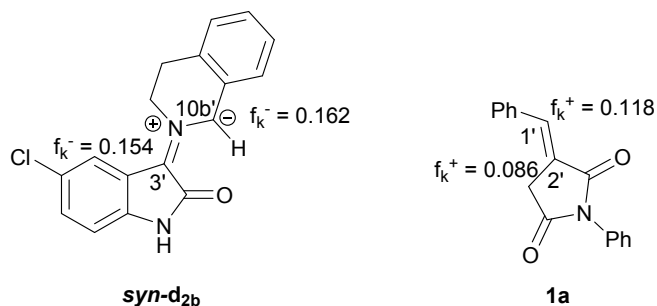

**Figure S1.** Fukui Function in the reactive centers of the species involved in the 1,3-dipolar cycloaddition (according to the ESP scheme).

## 2. Cartesian coordinates and energies for 1a, syn-d<sub>2a</sub>, exo-TS1, endo-TS1, exo-TS2, endo-TS2, 4f, 4'f, 5f and 5'f at the B3LYP/6-31G(d,p) level

- **1a**

Coordinates (Angstroms)

| Atom | X         | Y         | Z         |
|------|-----------|-----------|-----------|
| C    | 0.538104  | -0.755159 | 0.079733  |
| C    | -0.780484 | -0.073669 | -0.006336 |
| C    | -0.532246 | 1.393616  | -0.198809 |
| C    | 0.987864  | 1.526944  | -0.204767 |
| N    | 1.537003  | 0.244227  | -0.042194 |
| H    | -0.936790 | 2.022537  | 0.602992  |
| C    | 2.941469  | -0.024702 | -0.002893 |
| C    | 3.453059  | -1.150289 | -0.658379 |
| C    | 3.797717  | 0.839006  | 0.689296  |
| C    | 4.821912  | -1.408562 | -0.613059 |
| H    | 2.783891  | -1.821120 | -1.180947 |
| C    | 5.165616  | 0.573372  | 0.717901  |
| H    | 3.397908  | 1.714396  | 1.184141  |
| C    | 5.682780  | -0.549463 | 0.070876  |
| H    | 5.214159  | -2.285744 | -1.118728 |
| H    | 5.827050  | 1.248602  | 1.252285  |
| H    | 6.748865  | -0.753592 | 0.099595  |
| C    | -1.907237 | -0.806421 | 0.098382  |
| H    | -1.731300 | -1.872145 | 0.239167  |

|   |           |           |           |
|---|-----------|-----------|-----------|
| H | -0.920183 | 1.790596  | -1.144433 |
| C | -3.312103 | -0.410860 | 0.058245  |
| C | -4.279926 | -1.423401 | 0.218078  |
| C | -3.765080 | 0.911473  | -0.128568 |
| C | -5.640330 | -1.132746 | 0.195407  |
| H | -3.948616 | -2.448077 | 0.362348  |
| C | -5.126334 | 1.200251  | -0.151488 |
| H | -3.056469 | 1.719585  | -0.258078 |
| C | -6.070118 | 0.182731  | 0.010401  |
| H | -6.365348 | -1.931131 | 0.321679  |
| H | -5.453835 | 2.225392  | -0.296934 |
| O | 0.756030  | -1.942425 | 0.226430  |
| O | 1.614563  | 2.556715  | -0.326889 |
| H | -7.131062 | 0.414078  | -0.008184 |

Zero-point correction = 0.259160Hartree

ZPE is included in the following quantities:

Electronic energy = -860.623580 Hartree

Internal energy = -860.607784 Hartree

Enthalpies= -860.606840 Hartree

Gibbs energy = -860.668766 Hartree

Number of imaginary frequencies: 0

- *syn-d<sub>2b</sub>*

Coordinates (Angstroms)

| Atom | X         | Y         | Z         |
|------|-----------|-----------|-----------|
| C    | 2.652873  | 1.527773  | 0.150353  |
| C    | 1.783245  | 0.400915  | 0.006333  |
| C    | 2.373486  | -0.862242 | -0.173795 |
| C    | 3.764693  | -0.967552 | -0.156444 |
| C    | 4.601388  | 0.134321  | 0.013902  |
| C    | 4.033876  | 1.405035  | 0.160162  |
| C    | 0.517069  | 2.385495  | 0.135983  |
| C    | 0.442696  | 0.933017  | 0.029899  |
| H    | 1.791100  | -1.755373 | -0.354721 |
| H    | 5.677059  | 0.005878  | 0.021191  |
| H    | 4.668402  | 2.278647  | 0.274801  |
| N    | 1.879577  | 2.672176  | 0.245160  |
| H    | 2.220197  | 3.618645  | 0.305153  |
| O    | -0.380698 | 3.236022  | 0.154158  |
| C    | -0.783175 | -1.198207 | 0.242722  |
| C    | -1.937989 | 0.878994  | -0.220830 |
| C    | -2.025468 | -1.647159 | 1.006520  |
| H    | -0.725868 | -1.683572 | -0.738162 |
| C    | -3.197593 | 0.184181  | -0.183108 |
| C    | -3.286582 | -1.107344 | 0.383267  |

|    |           |           |           |
|----|-----------|-----------|-----------|
| H  | -2.031239 | -2.741195 | 1.042096  |
| C  | -4.358837 | 0.792819  | -0.699212 |
| H  | -4.291777 | 1.788863  | -1.127274 |
| C  | -4.508680 | -1.770545 | 0.404748  |
| H  | -4.572075 | -2.763175 | 0.843492  |
| C  | -5.574815 | 0.118549  | -0.671275 |
| H  | -6.463709 | 0.592137  | -1.076631 |
| C  | -5.653417 | -1.165902 | -0.124758 |
| H  | -6.602055 | -1.693348 | -0.105889 |
| H  | -1.880962 | 1.938323  | -0.437091 |
| N  | -0.772719 | 0.275070  | 0.010667  |
| H  | 0.111762  | -1.443423 | 0.808548  |
| H  | -1.951491 | -1.297500 | 2.046151  |
| Cl | 4.487742  | -2.565688 | -0.373678 |

Zero-point correction = 0.264247 Hartree

ZPE is included in the following quantities:

Electronic energy = -1300.322345 Hartree

Internal energy = -1300.306125 Hartree

Enthalpies= -1300.305181 Hartree

Gibbs energy = -1300.366719 Hartree

Number of imaginary frequencies: 0

- **exo-TS1**

Coordinates (Angstroms)

| Atom | X         | Y         | Z         |
|------|-----------|-----------|-----------|
| C    | 1.964025  | -1.869119 | 1.775371  |
| C    | 1.376849  | -1.819240 | 0.482678  |
| C    | 2.200183  | -2.056146 | -0.627642 |
| C    | 3.539190  | -2.388221 | -0.412741 |
| C    | 4.095579  | -2.458114 | 0.863786  |
| C    | 3.299424  | -2.182610 | 1.978851  |
| C    | -0.230050 | -1.280263 | 2.139320  |
| C    | -0.017149 | -1.422052 | 0.670241  |
| H    | 1.844997  | -1.952662 | -1.642074 |
| H    | 5.141545  | -2.713434 | 0.985956  |
| H    | 3.721903  | -2.212273 | 2.977906  |
| N    | 0.998445  | -1.548375 | 2.720159  |
| H    | 1.140561  | -1.477205 | 3.716141  |
| O    | -1.237951 | -0.981517 | 2.782053  |
| C    | -0.835672 | -2.027641 | -1.580390 |
| C    | -2.234011 | -0.865898 | 0.061261  |
| C    | -2.049999 | -2.768861 | -2.124197 |
| H    | -0.581850 | -1.152554 | -2.189131 |
| C    | -3.417634 | -1.146530 | -0.790479 |
| C    | -3.335591 | -2.018447 | -1.891830 |

|    |           |           |           |
|----|-----------|-----------|-----------|
| H  | -1.890982 | -2.955823 | -3.191583 |
| C  | -4.658061 | -0.563431 | -0.477028 |
| H  | -4.743180 | 0.077283  | 0.392358  |
| C  | -4.465099 | -2.250657 | -2.679976 |
| H  | -4.389307 | -2.927195 | -3.527689 |
| C  | -5.777478 | -0.802643 | -1.269017 |
| H  | -6.725117 | -0.338767 | -1.013034 |
| C  | -5.681481 | -1.638906 | -2.382697 |
| H  | -6.550811 | -1.824641 | -3.006373 |
| N  | -1.067153 | -1.570556 | -0.191421 |
| H  | 0.016099  | -2.701722 | -1.568251 |
| H  | -2.117873 | -3.754060 | -1.641532 |
| C  | -0.326423 | 1.157917  | 0.412933  |
| C  | -1.631691 | 1.030931  | -0.139362 |
| H  | -2.438849 | -0.777051 | 1.121420  |
| Cl | 4.562775  | -2.708973 | -1.810896 |
| H  | -1.615131 | 1.027058  | -1.228820 |
| C  | 0.834196  | 1.193140  | -0.482774 |
| C  | 1.525879  | 2.186272  | 1.519914  |
| C  | 0.055898  | 1.838236  | 1.696192  |
| H  | -0.083381 | 1.243974  | 2.605143  |
| H  | -0.503206 | 2.769489  | 1.859271  |
| O  | 2.250098  | 2.689491  | 2.353852  |
| N  | 1.899253  | 1.839106  | 0.210218  |
| O  | 0.913161  | 0.780911  | -1.634157 |
| C  | 3.163309  | 2.169912  | -0.371259 |
| C  | 3.785202  | 1.294392  | -1.268619 |
| C  | 3.773405  | 3.390476  | -0.050880 |
| C  | 5.008306  | 1.642950  | -1.839715 |
| H  | 3.309737  | 0.359640  | -1.525391 |
| C  | 5.000760  | 3.721251  | -0.621073 |
| H  | 3.298769  | 4.064039  | 0.650120  |
| C  | 5.623458  | 2.852704  | -1.518509 |
| H  | 5.480762  | 0.955979  | -2.535331 |
| H  | 5.467995  | 4.666890  | -0.362407 |
| H  | 6.578976  | 3.116392  | -1.962106 |
| C  | -2.750240 | 1.844911  | 0.425034  |
| C  | -3.488234 | 2.674086  | -0.434614 |
| C  | -3.095757 | 1.818949  | 1.787540  |
| C  | -4.529970 | 3.464357  | 0.049821  |
| H  | -3.238404 | 2.700402  | -1.491661 |
| C  | -4.141163 | 2.607273  | 2.269994  |
| H  | -2.563863 | 1.157445  | 2.464932  |
| C  | -4.861044 | 3.434330  | 1.405350  |

H -5.084097 4.101414 -0.633520  
H -4.396036 2.569993 3.325267  
H -5.674182 4.046383 1.784180

Zero-point correction = 0.525230 Hartree

ZPE is included in the following quantities:

Electronic energy = -2160.923276 Hartree

Internal energy = -2160.890804 Hartree

Enthalpies = -2160.889860 Hartree

Gibbs energy = -2160.987628 Hartree

Number of imaginary frequencies: 1 (-362.6156)

• **endo-TS1**

Coordinates (Angstroms)

| Atom | X         | Y         | Z         |
|------|-----------|-----------|-----------|
| C    | 0.947504  | 0.761444  | 2.715716  |
| C    | 1.896226  | 0.520881  | 0.484408  |
| C    | 2.282764  | 1.239553  | 3.267896  |
| H    | 0.303674  | 1.598994  | 2.429121  |
| C    | 2.967002  | 1.480078  | 0.862103  |
| C    | 3.144530  | 1.872266  | 2.202860  |
| H    | 2.087598  | 1.947690  | 4.080289  |
| C    | 3.843666  | 1.974433  | -0.118691 |
| H    | 3.735102  | 1.650342  | -1.147392 |
| C    | 4.162270  | 2.772963  | 2.526224  |
| H    | 4.294464  | 3.070698  | 3.563419  |
| C    | 4.852198  | 2.873136  | 0.217412  |
| H    | 5.517767  | 3.248031  | -0.554040 |
| C    | 5.008414  | 3.282648  | 1.542800  |
| H    | 5.791376  | 3.985808  | 1.810644  |
| N    | 1.176400  | -0.078694 | 1.507107  |
| H    | 0.398985  | 0.169291  | 3.441404  |
| H    | 2.822799  | 0.392625  | 3.714802  |
| C    | -0.691406 | 0.571734  | -0.576082 |
| C    | 0.482750  | 1.381228  | -0.610368 |
| C    | 0.308951  | -1.076920 | 1.176123  |
| C    | 0.551875  | -2.205587 | 0.281743  |
| C    | -0.925025 | -1.405254 | 1.953601  |
| C    | -0.563089 | -3.076934 | 0.410409  |
| H    | 2.190814  | -0.162808 | -0.298132 |
| O    | -1.455043 | -0.825412 | 2.894355  |
| N    | -1.430601 | -2.556772 | 1.359561  |
| H    | -2.281160 | -2.988406 | 1.687584  |
| C    | 1.596576  | -2.587812 | -0.570659 |
| C    | -0.669525 | -4.261938 | -0.304967 |
| H    | -1.536932 | -4.904504 | -0.195277 |
| C    | 1.489576  | -3.789896 | -1.273677 |
| C    | 0.373205  | -4.619141 | -1.163978 |

|    |           |           |           |
|----|-----------|-----------|-----------|
| H  | 0.320978  | -5.536364 | -1.738480 |
| H  | 2.500301  | -2.003411 | -0.681008 |
| Cl | 2.811435  | -4.266967 | -2.336247 |
| H  | 0.368444  | 2.268509  | 0.011502  |
| C  | -1.261759 | -0.291859 | -1.664780 |
| H  | -1.188488 | 0.173132  | -2.656797 |
| H  | -0.816661 | -1.288163 | -1.758646 |
| C  | -1.804213 | 0.994711  | 0.290209  |
| C  | -2.734983 | -0.445690 | -1.301770 |
| O  | -3.554199 | -1.121887 | -1.889228 |
| O  | -1.780373 | 1.790867  | 1.215454  |
| N  | -2.982341 | 0.340771  | -0.169603 |
| C  | -4.269032 | 0.503906  | 0.430262  |
| C  | -4.396266 | 0.480101  | 1.823941  |
| C  | -5.394518 | 0.687536  | -0.381036 |
| C  | -5.655620 | 0.652301  | 2.397156  |
| H  | -3.520288 | 0.327569  | 2.442241  |
| C  | -6.648312 | 0.845432  | 0.206696  |
| H  | -5.287698 | 0.691145  | -1.458443 |
| C  | -6.783709 | 0.833411  | 1.595655  |
| H  | -5.752326 | 0.638428  | 3.478830  |
| H  | -7.520084 | 0.982681  | -0.426209 |
| H  | -7.761924 | 0.961936  | 2.049670  |
| C  | 1.144315  | 1.673960  | -1.918415 |
| C  | 1.546196  | 0.668749  | -2.814751 |
| C  | 1.379970  | 3.011651  | -2.275992 |
| 6  | 2.157421  | 0.992037  | -4.026849 |
| H  | 1.393134  | -0.376801 | -2.562868 |
| C  | 1.985917  | 3.335704  | -3.489027 |
| H  | 1.080400  | 3.802887  | -1.594728 |
| C  | 2.379218  | 2.326769  | -4.369860 |
| H  | 2.461402  | 0.197449  | -4.702014 |
| H  | 2.152747  | 4.378169  | -3.744278 |
| H  | 2.854479  | 2.577317  | -5.313443 |

Zero-point correction = 0.524750 Hartree

ZPE is included in the following quantities:

Electronic energy = -2160.918647 Hartree

Internal energy = -2160.886066 Hartree

Enthalpies = -2160.885122 Hartree

Gibbs energy = -2160.983177 Hartree

Number of imaginary frequencies: 1 (-375.9301)

• *exo-TS2*

Coordinates (Angstroms)

| Atom | X        | Y        | Z         |
|------|----------|----------|-----------|
| C    | 4.146929 | 0.218102 | -0.611981 |
| C    | 3.048360 | 0.433338 | 0.250372  |

|   |           |           |           |
|---|-----------|-----------|-----------|
| C | 3.231635  | 0.294402  | 1.627006  |
| C | 4.513665  | 0.005157  | 2.105491  |
| C | 5.597633  | -0.178467 | 1.248513  |
| C | 5.415186  | -0.081987 | -0.134703 |
| C | 2.365336  | 0.609469  | -2.016581 |
| C | 1.846624  | 0.609538  | -0.595548 |
| H | 2.410692  | 0.392765  | 2.326089  |
| H | 6.575971  | -0.404059 | 1.656524  |
| H | 6.248682  | -0.240887 | -0.811217 |
| N | 3.719730  | 0.351028  | -1.931253 |
| H | 4.281741  | 0.192904  | -2.754012 |
| O | 1.752376  | 0.786130  | -3.062440 |
| C | 0.712149  | 2.145613  | 1.028848  |
| C | -0.282012 | 1.457301  | -1.092375 |
| C | -0.104221 | 3.432698  | 0.963096  |
| H | 0.245411  | 1.419615  | 1.701641  |
| C | -1.442428 | 2.298914  | -0.818298 |
| C | -1.408150 | 3.241807  | 0.229260  |
| H | -0.277283 | 3.788490  | 1.983772  |
| C | -2.600675 | 2.181048  | -1.606884 |
| H | -2.624218 | 1.470116  | -2.426980 |
| C | -2.535924 | 4.021819  | 0.485775  |
| H | -2.506617 | 4.752243  | 1.290325  |
| C | -3.721118 | 2.958946  | -1.335436 |
| H | -4.614803 | 2.847689  | -1.940806 |
| C | -3.692045 | 3.877610  | -0.283031 |
| H | -4.565445 | 4.485016  | -0.066134 |
| N | 0.826696  | 1.531673  | -0.317013 |
| H | 1.720419  | 2.367240  | 1.375676  |
| H | 0.483375  | 4.209684  | 0.453439  |
| C | 0.790583  | -1.158502 | -0.446865 |
| C | -0.569507 | -0.841021 | -0.752746 |
| H | 0.954198  | -1.197087 | 0.628463  |
| C | -1.379157 | -1.323500 | -1.931527 |
| C | -1.492783 | -0.668829 | 0.375030  |
| C | -2.824936 | -1.265362 | -1.454087 |
| C | 1.564721  | -2.206183 | -1.164518 |
| C | 2.371624  | -3.074338 | -0.406477 |
| C | 1.532962  | -2.388155 | -2.560574 |
| C | 3.101188  | -4.096486 | -1.010618 |
| H | 2.414881  | -2.948519 | 0.671662  |
| C | 2.264508  | -3.410660 | -3.163773 |
| H | 0.965804  | -1.706300 | -3.182264 |
| C | 3.047060  | -4.272938 | -2.393900 |
| H | 3.708785  | -4.756872 | -0.398573 |
| H | 2.222628  | -3.531150 | -4.242624 |



|    |           |           |           |
|----|-----------|-----------|-----------|
| O  | -1.232915 | -0.376655 | 1.535979  |
| N  | -2.813773 | -0.911872 | -0.098572 |
| O  | -3.814485 | -1.487322 | -2.122279 |
| C  | -3.985148 | -0.811131 | 0.711324  |
| C  | -4.994798 | -1.773473 | 0.595467  |
| C  | -4.122964 | 0.246624  | 1.617110  |
| C  | -6.138836 | -1.671780 | 1.384914  |
| H  | -4.888982 | -2.581817 | -0.116703 |
| C  | -5.266597 | 0.329401  | 2.409624  |
| H  | -3.337341 | 0.985473  | 1.702343  |
| C  | -6.278433 | -0.624994 | 2.297011  |
| H  | -6.920972 | -2.418837 | 1.287366  |
| H  | -5.366520 | 1.149067  | 3.115175  |
| H  | -7.169110 | -0.552972 | 2.914174  |
| H  | -1.284302 | -0.734198 | -2.850474 |
| H  | -1.151304 | -2.360827 | -2.207901 |
| H  | -0.112099 | 1.129405  | -2.107759 |
| H  | 3.610435  | -5.071621 | -2.867436 |
| Cl | 4.758260  | -0.140668 | 3.843476  |

Zero-point correction = 0.525026 Hartree

ZPE is included in the following quantities:

Electronic energy = -2160.921882 Hartree

Internal energy = -2160.889344 Hartree

Enthalpies = -2160.888400 Hartree

Gibbs energy = -2160.986698 Hartree

Number of imaginary frequencies: 1 (-362.2742)

• *endo-TS2*

Coordinates (Angstroms)

| Atom | X         | Y        | Z         |
|------|-----------|----------|-----------|
| C    | 0.387800  | 2.123574 | 2.004941  |
| C    | 0.218874  | 1.314146 | -0.286314 |
| C    | -0.061610 | 3.502349 | 1.535311  |
| H    | -0.446691 | 1.554966 | 2.422576  |
| C    | -0.754257 | 2.366490 | -0.587175 |
| C    | -0.948832 | 3.430170 | 0.317027  |
| H    | -0.578571 | 3.999133 | 2.362647  |
| C    | -1.485698 | 2.332334 | -1.787271 |
| H    | -1.326656 | 1.525035 | -2.496198 |
| C    | -1.887843 | 4.417867 | 0.015303  |
| H    | -2.035337 | 5.240270 | 0.710628  |
| C    | -2.423690 | 3.319229 | -2.071105 |
| H    | -2.992358 | 3.273882 | -2.994169 |
| C    | -2.629859 | 4.362629 | -1.165102 |
| H    | -3.362499 | 5.134349 | -1.380863 |
| N    | 0.955870  | 1.360815 | 0.856036  |
| H    | 1.157121  | 2.204859 | 2.767773  |

|   |           |           |           |
|---|-----------|-----------|-----------|
| H | 0.819467  | 4.117008  | 1.300368  |
| C | 0.359861  | -1.253658 | 0.954237  |
| C | -0.615271 | -0.758342 | 0.027458  |
| H | 0.054820  | -1.074414 | 1.983768  |
| C | -0.897204 | -1.318294 | -1.348365 |
| C | -1.911586 | -0.319016 | 0.585968  |
| C | -2.361242 | -0.990058 | -1.610862 |
| C | 1.083213  | -2.536501 | 0.792637  |
| C | 1.233553  | -3.356327 | 1.928257  |
| C | 1.628370  | -2.992659 | -0.422300 |
| C | 1.874625  | -4.590197 | 1.848818  |
| H | 0.829961  | -3.017332 | 2.878357  |
| C | 2.272440  | -4.227221 | -0.500383 |
| H | 1.574414  | -2.372926 | -1.309301 |
| C | 2.393771  | -5.034538 | 0.631041  |
| H | 1.965022  | -5.207052 | 2.738418  |
| H | 2.684438  | -4.554997 | -1.450356 |
| O | -2.155533 | 0.097268  | 1.707181  |
| N | -2.895824 | -0.457890 | -0.432299 |
| O | -2.962362 | -1.162535 | -2.651623 |
| C | -4.267726 | -0.092781 | -0.270779 |
| C | -5.271012 | -0.927580 | -0.775346 |
| C | -4.604562 | 1.094242  | 0.388935  |
| C | -6.608861 | -0.569680 | -0.619155 |
| H | -5.002939 | -1.837853 | -1.296480 |
| C | -5.946902 | 1.434032  | 0.548992  |
| H | -3.823528 | 1.732706  | 0.779985  |
| C | -6.952712 | 0.608030  | 0.045781  |
| H | -7.383537 | -1.218674 | -1.016533 |
| H | -6.204613 | 2.352858  | 1.067440  |
| H | -7.996652 | 0.880082  | 0.170227  |
| H | -0.290358 | -0.914572 | -2.167223 |
| H | -0.780200 | -2.408467 | -1.390764 |
| C | 1.819939  | 0.286557  | 1.071030  |
| C | 2.939365  | -0.034859 | 0.153578  |
| C | 2.325479  | -0.045097 | 2.450409  |
| C | 3.937417  | -0.674263 | 0.925579  |
| H | 0.691425  | 0.846314  | -1.135719 |
| O | 1.782133  | 0.106381  | 3.535948  |
| N | 3.534686  | -0.692066 | 2.256775  |
| H | 4.039503  | -1.108911 | 3.023895  |
| C | 3.182414  | 0.177701  | -1.203695 |
| C | 5.125117  | -1.134937 | 0.374963  |
| H | 5.873920  | -1.626800 | 0.987449  |
| C | 4.385940  | -0.275229 | -1.753536 |
| C | 5.346285  | -0.936411 | -0.990868 |

|    |          |           |           |
|----|----------|-----------|-----------|
| H  | 6.261676 | -1.284059 | -1.455178 |
| H  | 2.483454 | 0.696359  | -1.846876 |
| H  | 2.890761 | -5.997916 | 0.565577  |
| Cl | 4.686180 | -0.004285 | -3.468908 |

Zero-point correction = 0.524702 Hartree

ZPE is included in the following quantities:

Electronic energy = -2160.914445 Hartree

Internal energy = -2160.881817 Hartree

Enthalpies = -2160.880872 Hartree

Gibbs energy = -2160.979138 Hartree

Number of imaginary frequencies: 1 (-378.2990)

• **4f**

Coordinates (Angstroms)

| Atom  |   | X         | Y         | Z         |
|-------|---|-----------|-----------|-----------|
| ----- |   |           |           |           |
| 6     | 0 | 1.532876  | -2.622593 | 2.067269  |
| 6     | 0 | 1.288258  | -1.992035 | 0.834150  |
| 6     | 0 | 2.236047  | -2.107171 | -0.179139 |
| 6     | 0 | 3.400969  | -2.842859 | 0.069757  |
| 6     | 0 | 3.633291  | -3.463415 | 1.294429  |
| 6     | 0 | 2.686269  | -3.354721 | 2.316589  |
| 6     | 0 | -0.487773 | -1.564549 | 2.386323  |
| 6     | 0 | -0.065547 | -1.283806 | 0.892714  |
| 1     | 0 | 2.087364  | -1.639357 | -1.142771 |
| H     |   | 4.546256  | -4.026066 | 1.452145  |
| H     |   | 2.855312  | -3.831283 | 3.276773  |
| N     |   | 0.473465  | -2.374237 | 2.941754  |
| H     |   | 0.394005  | -2.721167 | 3.886602  |
| O     |   | -1.478409 | -1.167326 | 2.973735  |
| C     |   | -0.787118 | -2.388288 | -1.253467 |
| C     |   | -2.234357 | -0.900006 | 0.105800  |
| C     |   | -1.998486 | -3.105643 | -1.835716 |
| H     |   | -0.455727 | -1.588786 | -1.931852 |
| C     |   | -3.314474 | -1.156037 | -0.934278 |
| C     |   | -3.206968 | -2.202443 | -1.864544 |
| H     |   | -1.763523 | -3.459786 | -2.845841 |
| C     |   | -4.468725 | -0.357053 | -0.940609 |
| H     |   | -4.574993 | 0.436676  | -0.209288 |
| C     |   | -4.235533 | -2.408377 | -2.792653 |
| H     |   | -4.139304 | -3.216972 | -3.513513 |
| C     |   | -5.485169 | -0.570904 | -1.867860 |
| H     |   | -6.367390 | 0.062434  | -1.856075 |
| C     |   | -5.368271 | -1.600155 | -2.803745 |
| H     |   | -6.154878 | -1.772907 | -3.532571 |
| N     |   | -1.136293 | -1.884860 | 0.084851  |
| H     |   | 0.036605  | -3.095819 | -1.146955 |

|    |           |           |           |
|----|-----------|-----------|-----------|
| H  | -2.213596 | -3.993500 | -1.225821 |
| C  | -0.095852 | 0.293877  | 0.634342  |
| C  | -1.540899 | 0.513697  | 0.005765  |
| H  | -2.701404 | -0.964519 | 1.090875  |
| Cl | 4.603270  | -2.986559 | -1.208398 |
| H  | -1.380654 | 0.693825  | -1.060343 |
| C  | 0.907362  | 0.760162  | -0.434143 |
| C  | 1.313364  | 2.153707  | 1.392126  |
| C  | 0.304424  | 1.128547  | 1.867641  |
| H  | 0.807781  | 0.526648  | 2.631572  |
| H  | -0.525809 | 1.633163  | 2.361043  |
| O  | 1.781032  | 3.071117  | 2.026676  |
| N  | 1.650699  | 1.834372  | 0.061069  |
| O  | 1.014467  | 0.321913  | -1.565366 |
| C  | 2.618917  | 2.557232  | -0.709612 |
| C  | 3.587180  | 1.862121  | -1.439313 |
| C  | 2.589158  | 3.954725  | -0.719091 |
| C  | 4.522672  | 2.573513  | -2.188643 |
| H  | 3.604013  | 0.779526  | -1.424212 |
| C  | 3.536814  | 4.654778  | -1.464124 |
| H  | 1.841666  | 4.482748  | -0.140391 |
| C  | 4.501956  | 3.968847  | -2.202621 |
| H  | 5.271531  | 2.032183  | -2.758566 |
| H  | 3.516135  | 5.740292  | -1.467566 |
| H  | 5.235385  | 4.518779  | -2.784557 |
| C  | -2.338375 | 1.682300  | 0.545887  |
| C  | -2.499862 | 2.829263  | -0.244937 |
| C  | -2.937778 | 1.661156  | 1.817899  |
| C  | -3.236173 | 3.923029  | 0.211825  |
| H  | -2.050790 | 2.860477  | -1.234428 |
| C  | -3.675280 | 2.754495  | 2.274323  |
| H  | -2.819273 | 0.788601  | 2.453072  |
| C  | -3.828160 | 3.888558  | 1.474402  |
| H  | -3.349521 | 4.798488  | -0.421040 |
| H  | -4.131287 | 2.718565  | 3.259572  |
| H  | -4.403865 | 4.736994  | 1.832358  |

Zero-point correction = 0.528551 Hartree

ZPE is included in the following quantities:

Electronic energy = -2160.956677 Hartree

Internal energy = -2160.924698 Hartree

Enthalpies = -2160.923754 Hartree

Gibbs energy = -2161.021246 Hartree.

Number of imaginary frequencies: 0

• 4'f

Coordinates (Angstroms)

| Atom | X | Y | Z |
|------|---|---|---|
|------|---|---|---|

|    |           |           |           |
|----|-----------|-----------|-----------|
| C  | 1.919084  | -0.598164 | 2.565584  |
| C  | 1.946800  | 0.686436  | 0.379582  |
| C  | 3.408696  | -0.207160 | 2.547342  |
| H  | 1.454145  | -0.250629 | 3.496514  |
| C  | 2.896029  | 1.686424  | 1.012530  |
| C  | 3.617364  | 1.227346  | 2.129958  |
| H  | 3.846009  | -0.399297 | 3.531834  |
| C  | 3.087384  | 2.991662  | 0.555669  |
| H  | 2.545529  | 3.351013  | -0.312549 |
| C  | 4.499649  | 2.088295  | 2.784279  |
| H  | 5.046412  | 1.733958  | 3.654660  |
| C  | 3.981405  | 3.842774  | 1.209699  |
| H  | 4.121373  | 4.856993  | 0.847588  |
| C  | 4.684424  | 3.394130  | 2.326644  |
| H  | 5.373810  | 4.057005  | 2.841377  |
| N  | 1.199492  | -0.007150 | 1.433914  |
| H  | 1.848868  | -1.696081 | 2.553011  |
| H  | 3.934433  | -0.864542 | 1.839950  |
| C  | -0.401838 | 0.266251  | -0.304045 |
| C  | 0.808531  | 1.260760  | -0.485919 |
| C  | 0.095365  | -0.734196 | 0.851318  |
| C  | 0.397523  | -2.167664 | 0.377200  |
| C  | -1.007167 | -1.010148 | 1.939892  |
| C  | -0.469516 | -3.062568 | 1.024817  |
| H  | 2.559188  | -0.014365 | -0.220205 |
| O  | -1.502853 | -0.206359 | 2.701667  |
| N  | -1.312989 | -2.353637 | 1.886877  |
| H  | -1.980083 | -2.767622 | 2.521882  |
| C  | 1.359410  | -2.668780 | -0.492523 |
| C  | -0.418276 | -4.434301 | 0.810474  |
| H  | -1.100573 | -5.111330 | 1.314404  |
| C  | 1.422732  | -4.051206 | -0.706209 |
| C  | 0.545936  | -4.929431 | -0.073061 |
| H  | 0.615632  | -5.993893 | -0.265074 |
| H  | 2.050910  | -2.018247 | -1.013063 |
| Cl | 2.639210  | -4.688504 | -1.806925 |
| H  | 0.484060  | 2.169460  | 0.028232  |
| C  | -0.986740 | -0.449879 | -1.533912 |
| H  | -0.856646 | 0.167974  | -2.429309 |
| H  | -0.578204 | -1.433745 | -1.754670 |
| C  | -1.638005 | 1.086469  | 0.159175  |
| C  | -2.480796 | -0.544491 | -1.270193 |
| O  | -3.275748 | -1.272277 | -1.823422 |
| O  | -1.632447 | 2.136737  | 0.755319  |
| N  | -2.793117 | 0.422229  | -0.297600 |
| C  | -4.121574 | 0.780877  | 0.099771  |

|   |           |           |           |
|---|-----------|-----------|-----------|
| C | -4.378619 | 1.068722  | 1.444444  |
| C | -5.146479 | 0.840900  | -0.849784 |
| C | -5.669080 | 1.426297  | 1.830840  |
| H | -3.576393 | 1.011686  | 2.170189  |
| C | -6.434344 | 1.189822  | -0.445738 |
| H | -4.941045 | 0.601613  | -1.885303 |
| C | -6.699741 | 1.487019  | 0.891504  |
| H | -5.867352 | 1.654581  | 2.873765  |
| H | -7.230434 | 1.231817  | -1.183023 |
| H | -7.703807 | 1.762844  | 1.199826  |
| C | 1.141381  | 1.630120  | -1.918484 |
| C | 1.969366  | 0.854112  | -2.743166 |
| C | 0.573684  | 2.793803  | -2.462768 |
| C | 2.226777  | 1.231301  | -4.061856 |
| H | 2.427334  | -0.052386 | -2.359459 |
| C | 0.824857  | 3.171399  | -3.782020 |
| H | -0.070979 | 3.407817  | -1.838875 |
| C | 1.655484  | 2.390978  | -4.586973 |
| H | 2.875680  | 0.616440  | -4.678726 |
| H | 0.374962  | 4.077397  | -4.177511 |
| H | 1.857036  | 2.683755  | -5.613010 |

Zero-point correction = 0.527438 Hartree

ZPE is included in the following quantities:

Electronic energy = -2160.946851 Hartree

Internal energy = -2160.914584 Hartree

Enthalpies = -2160.913640 Hartree

Gibbs energy = -2161.012267 Hartree.

Number of imaginary frequencies: 0

• **5f**

Coordinates (Angstroms)

| Atom | X        | Y         | Z         |
|------|----------|-----------|-----------|
| C    | 4.061611 | 0.197077  | 0.170194  |
| C    | 2.767597 | 0.249232  | 0.703864  |
| C    | 2.553083 | 0.078311  | 2.062111  |
| C    | 3.669636 | -0.156783 | 2.873649  |
| C    | 4.958637 | -0.221654 | 2.344634  |
| C    | 5.170050 | -0.042472 | 0.971905  |
| C    | 2.715464 | 0.697608  | -1.639101 |
| C    | 1.764818 | 0.486274  | -0.410452 |
| H    | 1.551337 | 0.134798  | 2.475759  |
| H    | 5.799441 | -0.408267 | 3.002922  |
| H    | 6.173336 | -0.087098 | 0.560396  |
| N    | 4.000985 | 0.439903  | -1.211714 |
| H    | 4.799294 | 0.557496  | -1.819278 |
| O    | 2.407610 | 1.083915  | -2.755093 |
| C    | 1.465628 | 2.945607  | -0.013507 |

|   |           |           |           |
|---|-----------|-----------|-----------|
| C | -0.283055 | 1.451423  | -1.072980 |
| C | 0.737817  | 3.997070  | -0.864765 |
| H | 1.408602  | 3.229859  | 1.044841  |
| C | -1.298332 | 2.556242  | -0.833771 |
| C | -0.757348 | 3.854568  | -0.738539 |
| H | 1.063051  | 4.999644  | -0.569897 |
| C | -2.685195 | 2.394658  | -0.778307 |
| H | -3.135203 | 1.414311  | -0.872255 |
| C | -1.603683 | 4.948653  | -0.552354 |
| H | -1.175431 | 5.944259  | -0.467555 |
| C | -3.525873 | 3.496870  | -0.604203 |
| H | -4.600664 | 3.348602  | -0.561094 |
| C | -2.986474 | 4.775510  | -0.483873 |
| H | -3.636452 | 5.633785  | -0.341635 |
| N | 0.878562  | 1.610109  | -0.188526 |
| H | 2.528864  | 2.941199  | -0.285770 |
| H | 1.032261  | 3.860607  | -1.914582 |
| C | 0.757897  | -0.723489 | -0.562146 |
| C | -0.652467 | -0.052167 | -0.884013 |
| H | 0.667583  | -1.093664 | 0.458936  |
| C | -1.484654 | -0.625499 | -2.042088 |
| C | -1.532765 | -0.305181 | 0.356968  |
| C | -2.755238 | -1.188787 | -1.432234 |
| C | 1.209505  | -1.910650 | -1.393164 |
| C | 1.410428  | -3.136084 | -0.738968 |
| C | 1.426389  | -1.861644 | -2.782053 |
| C | 1.818019  | -4.273411 | -1.436415 |
| H | 1.247088  | -3.198312 | 0.333807  |
| C | 1.831396  | -2.999174 | -3.481001 |
| H | 1.297411  | -0.928420 | -3.318179 |
| C | 2.028815  | -4.208638 | -2.813217 |
| H | 1.967152  | -5.207480 | -0.902776 |
| H | 1.992370  | -2.936773 | -4.553350 |
| O | -1.253107 | -0.041895 | 1.506872  |
| N | -2.710549 | -0.961699 | -0.043229 |
| O | -3.658992 | -1.739893 | -2.020473 |
| C | -3.748401 | -1.352322 | 0.863388  |
| C | -4.344309 | -2.611051 | 0.736545  |
| C | -4.161891 | -0.469709 | 1.866576  |
| C | -5.359663 | -2.980815 | 1.617100  |
| H | -4.026702 | -3.282337 | -0.050970 |
| C | -5.171670 | -0.856360 | 2.746195  |
| H | -3.689885 | 0.500001  | 1.961497  |
| C | -5.774572 | -2.108968 | 2.624553  |
| H | -5.824572 | -3.956582 | 1.513826  |
| H | -5.487774 | -0.171725 | 3.527405  |

|    |           |           |           |
|----|-----------|-----------|-----------|
| H  | -6.563109 | -2.403679 | 3.310417  |
| H  | -1.761515 | 0.134298  | -2.779806 |
| H  | -0.986814 | -1.429197 | -2.587981 |
| H  | 0.024544  | 1.531249  | -2.131979 |
| H  | 2.342566  | -5.091869 | -3.361760 |
| Cl | 3.442291  | -0.372670 | 4.605867  |

Zero-point correction = 0.527924 Hartree

ZPE is included in the following quantities:

Electronic energy = -2160.951755 Hartree

Internal energy = -2160.919534 Hartree

Enthalpies= -2160.918590 Hartree

Gibbs energy = -2161.017726 Hartree.

Number of imaginary frequencies: 0

• 5'f

Coordinates (Angstroms)

| Atom | X         | Y         | Z         |
|------|-----------|-----------|-----------|
| C    | 1.855217  | 2.660059  | 1.349218  |
| C    | 0.180128  | 1.524229  | -0.188418 |
| C    | 1.490508  | 3.884482  | 0.496431  |
| H    | 1.679453  | 2.879281  | 2.409893  |
| C    | -0.654522 | 2.795992  | -0.198379 |
| C    | 0.016538  | 3.972222  | 0.189062  |
| H    | 1.840517  | 4.793469  | 0.995037  |
| C    | -1.974009 | 2.887110  | -0.648833 |
| H    | -2.498463 | 2.009582  | -1.008211 |
| C    | -0.666031 | 5.190698  | 0.192667  |
| H    | -0.144048 | 6.090431  | 0.508617  |
| C    | -2.643727 | 4.111967  | -0.658914 |
| H    | -3.671299 | 4.158291  | -1.006700 |
| C    | -1.995655 | 5.265098  | -0.221102 |
| H    | -2.515951 | 6.218225  | -0.214455 |
| N    | 1.061541  | 1.488993  | 0.978641  |
| H    | 2.930795  | 2.461813  | 1.230162  |
| H    | 2.037745  | 3.825085  | -0.455792 |
| C    | 0.384449  | -0.706700 | 0.853172  |
| C    | -0.491380 | 0.097037  | -0.196340 |
| H    | -0.139142 | -0.538696 | 1.797954  |
| C    | -0.628069 | -0.482854 | -1.614202 |
| C    | -1.930209 | 0.037696  | 0.356420  |
| C    | -2.075054 | -0.913077 | -1.776927 |
| C    | 0.501553  | -2.208057 | 0.684273  |
| C    | -0.280531 | -3.014745 | 1.528617  |
| C    | 1.318483  | -2.848580 | -0.262644 |
| C    | -0.254637 | -4.405244 | 1.431552  |
| H    | -0.914579 | -2.540412 | 2.272549  |
| C    | 1.348803  | -4.241059 | -0.358284 |



|    |           |           |           |
|----|-----------|-----------|-----------|
| H  | 1.948880  | -2.267432 | -0.924920 |
| C  | 0.562368  | -5.024836 | 0.485658  |
| H  | -0.869828 | -5.002274 | 2.098324  |
| H  | 1.990812  | -4.711358 | -1.097459 |
| O  | -2.286879 | 0.384513  | 1.459658  |
| N  | -2.768466 | -0.558641 | -0.605148 |
| O  | -2.561299 | -1.457753 | -2.742942 |
| C  | -4.164317 | -0.806312 | -0.393694 |
| C  | -4.729190 | -2.013583 | -0.818376 |
| C  | -4.953729 | 0.161376  | 0.237098  |
| C  | -6.088641 | -2.244028 | -0.613748 |
| H  | -4.114884 | -2.752826 | -1.315287 |
| C  | -6.309751 | -0.086966 | 0.443011  |
| H  | -4.507434 | 1.086823  | 0.577448  |
| C  | -6.882545 | -1.286096 | 0.017839  |
| H  | -6.525085 | -3.180179 | -0.948579 |
| H  | -6.918329 | 0.663744  | 0.937996  |
| H  | -7.940069 | -1.473043 | 0.178259  |
| H  | -0.410162 | 0.256164  | -2.392675 |
| H  | 0.006691  | -1.350516 | -1.805534 |
| C  | 1.655829  | 0.168602  | 1.078195  |
| C  | 2.921273  | -0.080675 | 0.249859  |
| C  | 2.171117  | -0.101791 | 2.532077  |
| C  | 3.965613  | -0.448573 | 1.117129  |
| H  | 0.769397  | 1.556097  | -1.127749 |
| O  | 1.528425  | -0.019234 | 3.556234  |
| N  | 3.495979  | -0.477353 | 2.433549  |
| H  | 4.045780  | -0.712859 | 3.246619  |
| C  | 3.186706  | 0.053927  | -1.108616 |
| C  | 5.251956  | -0.709629 | 0.660577  |
| H  | 6.046020  | -0.998389 | 1.341938  |
| C  | 4.482814  | -0.203831 | -1.573132 |
| C  | 5.506566  | -0.585715 | -0.708985 |
| H  | 6.498135  | -0.782046 | -1.100370 |
| H  | 2.416690  | 0.337468  | -1.815700 |
| H  | 0.587334  | -6.107750 | 0.407603  |
| Cl | 4.819890  | -0.043456 | -3.293849 |

Zero-point correction = 0.527574 Hartree

ZPE is included in the following quantities:

Electronic energy = -2160.942797 Hartree

Internal energy = -2160.910365 Hartree

Enthalpies = -2160.909421 Hartree

Gibbs energy = -2161.009305 Hartree.

Number of imaginary frequencies: 0

### 3. Experimental Section

#### 3.1. General procedure for the preparation of cycloadducts 4–5

A mixture of **1** (1.0 mmol), isatin **2a-c** or acenaphthenequinone **2d** and tetrahydroisoquinoline **3** (1.2 mmol) was refluxed in methanol (5 mL) for 4h. After completion of the reaction (TLC), the solvent was removed under vacuum. The residue was chromatographed on silica gel employing ethyl acetate-cyclohexane (3:7 v/v) as eluent to obtain the pure products **4–5**.

#### 3.2. Spectroscopic data of compounds 4 and 5

*(1'R\*,2'R\*,3R\*,10b'R\*)-1',1''-diphenyl-1',5',6',10b'-tetrahydrodispiro[indoline-3,3'-pyrrolo[2,1-a]isoquinoline-2',3''-pyrrolidine]-2,2'',5''-trione (4a).*

White solid (0.26 g, 51%); mp 262-264°C; <sup>1</sup>H NMR: δ 2.47 (d, 1H, H-4'', *J* = 18.9 Hz), 2.72-3.2 (m, 5H, H-4'', H-5' and H-6'), 4.38 (d, 1H, H-1', *J* = 9.3 Hz), 5.57 (d, 1H, H-10b', *J* = 9.3 Hz), 6.71-7.49 (m, 18H, Ar-H); <sup>13</sup>C NMR: δ 29.8, 37.4, 42.9, 55.7, 61.5, 63.2, 77.2, 110.1, 123.4, 124.8, 125.6, 126.3, 126.5, 127.6, 128, 128.5, 128.7, 128.8, 129.6, 130.3, 131.5, 134.3, 138.6, 141.7, 173.7, 177.7; Anal Calcd for C<sub>34</sub>H<sub>27</sub>N<sub>3</sub>O<sub>3</sub>: C, 77.70; H, 5.18; N, 7.99%; found: C, 77.81; H, 5.1; N, 8.06%.

*(1'S\*,2'S\*,3S\*,10b'S\*)-1'',2'-diphenyl-6',10b'-dihydro-2'H,5'H-dispiro[indoline-3,3'-pyrrolo[2,1-a]isoquinoline-1',3''-pyrrolidine]-2,2'',5''-trione (5a).*

White solid (0.17g, 34%); mp 212-214°C; <sup>1</sup>H NMR: δ 2.65-3.12 (m, 4H, H-5' and H-6'), 3.25 (d, 1H, H-4'', *J* = 19 Hz), 3.35 (d, 1H, H-4'', *J* = 19 Hz), 4.64 (s, 1H, H-2'), 5.74 (s, 1H, H-10b'), 6.71-7.64 (m, 18H, Ar-H); <sup>13</sup>C NMR: δ 30.3, 40.4, 41.8, 56.1, 61.7, 70.1, 74.6, 109.7, 123.2, 123.8, 125.2, 125.8, 126.2, 127, 127.7, 128.7, 128.8, 129.6, 129.9, 130.4, 131.8, 133.6, 134.1, 135.8, 141.3, 174.7, 178.5, 179.7; Anal Calcd for C<sub>34</sub>H<sub>27</sub>N<sub>3</sub>O<sub>3</sub>: C, 77.70; H, 5.18; N, 7.99%; found: C, 77.75; H, 5.17; N, 8.00%.

*(1'R\*,2'R\*,3R\*,10b'R\*)-1''-phenyl-1'-(p-tolyl)-1',5',6',10b'-tetrahydrodispiro[indoline-3,3'-pyrrolo[2,1-a]isoquinoline-2',3''-pyrrolidine]-2,2'',5''-trione (4b).*

White solid (0.3g, 57%); mp 252-254°C; <sup>1</sup>H NMR: δ 2.43 (s, 3H, CH<sub>3</sub>), 2.52 (d, 1H, H-4'', *J* = 18.9 Hz), 2.72-3.1 (m, 5H, H-4'', H-5' and H-6'), 4.36 (d, 1H, H-1', *J* = 9.6 Hz), 5.55 (d, 1H, H-10b', *J* = 9.6 Hz), 6.76-7.43 (m, 17H, Ar-H), 7.83 (bs, 1H, NH); <sup>13</sup>C NMR: δ 20.6, 29.3, 36.8, 42.4, 54.9, 61.1, 62.5, 77.2, 109.4, 122.9, 124.3, 124.8, 125, 125.7, 126.3, 126, 127.1, 128, 129.7, 133.9, 135, 137.6, 141.1, 173.2, 177.2; Anal Calcd for C<sub>35</sub>H<sub>29</sub>N<sub>3</sub>O<sub>3</sub>: C, 77.90; H, 5.42; N, 7.79%; found: C, 78.06; H, 5.48; N, 7.88%.

*(1'S\*,2'S\*,3S\*,10b'S\*)-1''-phenyl-2'-(p-tolyl)-6',10b'-dihydro-2'H,5'H-dispiro[indoline-3,3'-pyrrolo[2,1-a]isoquinoline-1',3''-pyrrolidine]-2,2'',5''-trione (5b).*

White solid (0.16g, 31%); mp 208-210°C; <sup>1</sup>H NMR: δ 2.27 (s, 3H, CH<sub>3</sub>), 2.71-3.2 (m, 4H, H-5' and H-6'), 3.31 (dd, 2H, H-4''), 4.62 (s, 1H, H-2'), 5.73 (s, 1H, H-10b'), 6.72-7.65 (m, 17H, Ar-H); 7.71 (bs, 1H, NH); <sup>13</sup>C NMR: δ 20.4, 29.9, 39.9, 41.3, 55.6, 61, 69.6, 74.1, 109.1, 122.7, 123.2, 124.7, 125.3, 125.7, 126.4, 127.3, 127.9, 128.4, 129, 129.3, 129.8, 130, 131.4, 133.8, 135.3, 137.4, 140.8, 174.3, 178, 179.3; Anal Calcd for C<sub>35</sub>H<sub>29</sub>N<sub>3</sub>O<sub>3</sub>: C, 77.90; H, 5.42; N, 7.79%; found: C, 78.02; H, 5.50; N, 7.59%.

*(1'R\*,2'R\*,3R\*,10b'R\*)-1'-(p-anisyl)-1''-phenyl-1',5',6',10b'-tetrahydrodispiro[indoline-3,3'-pyrrolo[2,1-a]isoquinoline-2',3''-pyrrolidine]-2,2'',5''-trione (4c).*

White solid (0.32g, 59%); mp 232-234°C; <sup>1</sup>H NMR: δ 2.56 (d, 1H, H-4'', *J* = 18.9 Hz), 2.74-3.18 (m, 5H, H-4'', H-5' and H-6'), 3.86 (s, 3H, OCH<sub>3</sub>), 4.32 (d, 1H, H-1', *J* = 9.9 Hz), 5.55 (d, 1H, H-10b', *J* = 9.9 Hz), 6.74-7.4 (m, 17H, Ar-H), 7.88 (bs, 1H, NH); <sup>13</sup>C NMR: δ 29.8, 37.3, 42.9, 55.1, 55.3, 61.5, 63.2, 77.2, 110, 123.4, 124.8, 125.6, 126.3, 126.5, 127.6, 128.5,

128.7, 128.8, 130.2, 131.5, 159.2, 173.8, 177.9; Anal Calcd for C<sub>35</sub>H<sub>29</sub>N<sub>3</sub>O<sub>4</sub> : C, 75.66; H, 5.26; N, 7.56 %; found: C, 75.72; H, 5.36; N, 7.45 %.

*(1'S\*,2'S\*,3S\*,10b'S\*)-2'-(p-anisyl)-1''-phenyl-6',10b'-dihydro-2'H,5'H-dispiro[indoline-3,3'-pyrrolo[2,1-a]isoquinoline-1',3''-pyrrolidine]-2,2'',5''-trione (5c).*

White solid (0.15g, 28%); mp 200-202°C; <sup>1</sup>H NMR: δ 2.6-3.2 (m, 4H, H-5' and H-6'), 3.32 (dd, 2H, H-4''), 3.73 (s, 3H, OCH<sub>3</sub>), 4.59 (s, 1H, H-2'), 5.74 (s, 1H, H-10b'), 6.73-7.65 (m, 17H, Ar-H); <sup>13</sup>C NMR: δ 30.3, 40.4, 41.8, 55.1, 56.1, 61.1, 70, 74.8, 109.6, 114.2, 123.2, 123.7, 125.2, 125.8, 126.2, 127, 128.4, 128.9, 129.6, 129.9, 131.7, 131.8, 135.8, 141.3, 159.3, 174.8, 179.8; Anal Calcd for C<sub>35</sub>H<sub>29</sub>N<sub>3</sub>O<sub>4</sub> : C, 75.66; H, 5.26; N, 7.56 %; found: 75.78; H, 5.35; N, 7.33 %.

*(1'R\*,2'R\*,3R\*,10b'R\*)-1'-(p-chlorophenyl)-1''-phenyl-1',5',6',10b'-tetrahydrodispiro [indoline-3,3'-pyrrolo [2,1-a]isoquinoline-2',3''-pyrrolidine]-2,2'',5''-trione (4d).*

White solid (0.3g, 54%); mp 252-254°C; <sup>1</sup>H NMR: δ 2.44 (d, 1H, H-4'', J = 18.9 Hz), 2.71-3.18 (m, 5H, H-4'', H-5' and H-6'), 4.35 (d, 1H, H-1', J = 9.6 Hz), 5.55 (d, 1H, H-10b', J = 9.6 Hz), 6.68-7.49 (m, 17H, Ar-H), 8.03 (bs, 1H, NH); <sup>13</sup>C NMR: δ 29.7, 37.3, 42.9, 55.01, 61.3, 63.5, 77.2, 110.2, 123.5, 124.6, 125.6, 126.5, 127.4, 128.6, 128.9, 129.8, 130.4, 131.3, 134, 134.3, 137.4, 141.7, 173.4, 177.6; Anal Calcd for C<sub>34</sub>H<sub>26</sub>ClN<sub>3</sub>O<sub>3</sub> : C, 72.92; H, 4.68; N, 7.50 %; found: C, 73.08; H, 4.78; N, 7.59 %.

*(1'S\*,2'S\*,3S\*,10b'S\*)-2'-(p-chlorophenyl)-1''-phenyl-6',10b'-dihydro-2'H,5'H-dispiro[indoline-3,3'-pyrrolo[2,1-a]isoquinoline-1',3''-pyrrolidine]-2,2'',5''-trione (5d).*

White solid (0.14g, 26%); mp 208-210°C; <sup>1</sup>H NMR: δ 2.72-3.18 (m, 4H, H-5' and H-6'), 3.26 (dd, 2H, H-4''), 4.61 (s, 1H, H-2'), 5.77 (s, 1H, H-10b'), 6.72-7.65 (m, 17H, Ar-H); <sup>13</sup>C NMR: δ 30.3, 40.3, 41.7, 55.9, 61.3, 70.1, 74.7, 109.8, 110.1, 123.3, 123.5, 123.8, 124.5, 125.2, 125.6, 125.9, 126.2, 126.5, 127.1, 127.4, 128.5, 128.6, 129.1, 129.9, 130.4, 131.7, 131.9, 134.4, 141.2, 174.4, 179.5; Anal Calcd for C<sub>34</sub>H<sub>26</sub>ClN<sub>3</sub>O<sub>3</sub> : C, 72.92; H, 4.68; N, 7.50 %; found: C, 73.04; H, 4.77; N, 7.41 %.

*(1'R\*,2'R\*,3R\*,10b'R\*)-1''-phenyl-1'-(pyridin-2-yl)-1',5',6',10b'-tetrahydrodispiro [indoline-3,3'-pyrrolo [2,1-a]isoquinoline-2',3''-pyrrolidine]-2,2'',5''-trione (4e).*

White solid (0.24g, 48%); mp 260-262°C; <sup>1</sup>H NMR: δ 2.36 (d, 1H, H-4'', J = 18.6 Hz), 2.69-3.12 (m, 5H, H-4'', H-5' and H-6'), 4.64 (d, 1H, H-1', J = 9.6 Hz), 5.67 (d, 1H, H-10b', J = 9.6 Hz), 6.64-8.73 (m, 18H, Ar-H and NH); <sup>13</sup>C NMR: δ 29.6, 36.6, 43.1, 57.3, 60.8, 62.1, 77.2, 110, 122.7, 123.3, 124.5, 125.8, 126.6, 127.9, 128.5, 128.7, 128.8, 130.2, 131.6, 134, 134.6, 137.6, 137.7, 141.6, 149.9, 158.8, 173.7, 177.1, 177.4; Anal Calcd for C<sub>33</sub>H<sub>26</sub>N<sub>4</sub>O<sub>3</sub> : C, 75.27; H, 4.98; N, 10.64 %; found: C, 75.14; H, 5.08; N, 10.72 %.

*(1'R\*,2'R\*,3R\*,10b'R\*)-1''-phenyl-1'-(p-chlorophenyl)-1',5',6',10b'-tetrahydrodispiro [indoline-3,3'-pyrrolo [2,1-a]isoquinoline-2',3''-pyrrolidine]-2,2'',5''-trione (4f).*

White solid (0.38g, 68%); mp 252-254°C; <sup>1</sup>H NMR: δ 2.52 (d, 1H, H-4'', J = 18.6 Hz), 2.74-3.2 (m, 5H, H-4'', H-5' and H-6'), 4.4 (d, 1H, H-1', J = 9.6 Hz), 5.58 (d, 1H, H-10b', J = 9.6 Hz), 6.73-7.52 (m, 17H, Ar-H), 8.46 (bs, 1H, NH); <sup>13</sup>C NMR: δ 29.6, 37.3, 43, 55.7, 63.3, 77.1, 111.2, 124.7, 125.7, 126.2, 126.5, 126.8, 127.7, 128.2, 128.6, 128.8, 129, 129.7, 130.4, 131.3, 134.2, 137.7, 138.4, 140.3, 177.4, 177.7; Anal Calcd for C<sub>35</sub>H<sub>30</sub>ClN<sub>3</sub>O<sub>3</sub> : C, 72.97; H, 5.25; N, 7.29 %; found: C, 73.08; H, 5.11; N, 7.39 %.

*(1'S\*,2'S\*,3S\*,10b'S\*)-1''-phenyl-2'-(p-chlorophenyl)-6',10b'-dihydro-2'H,5'H-dispiro[indoline-3,3'-pyrrolo[2,1-a]isoquinoline-2',3''-pyrrolidine]-2,2'',5''-trione (5f).*

White solid (0.09g, 17%); mp 204-206 °C; <sup>1</sup>H NMR: δ 2.71-3.11 (m, 4H, H-5' and H-6'), 3.28 (dd, 2H, H-4''), 4.54 (s, 1H, H-2'), 5.77 (s, 1H, H-10b'), 6.73-7.50 (m, 18H, Ar-H and NH); <sup>13</sup>C NMR: δ 30.2, 37.2, 43, 55.8, 61.3, 69.9, 74.9, 111, 123.7, 124.5, 125.5, 125.7, 126.2, 126.6, 127.3, 127.6, 128.6, 129.9, 129, 129.1, 130, 131.6, 132, 134.1, 134.6, 139.8, 174.2, 179.2; Anal Calcd for C<sub>35</sub>H<sub>30</sub>ClN<sub>3</sub>O<sub>3</sub>: C, 72.97; H, 5.25; N, 7.29 %; found: C, 73.04; H, 4.97; N, 7.36 %.

*(1'R\*,2'R\*,3R\*,10b'R\*)-6-chloro-1''-phenyl-1'-(p-tolyl)-1',5',6',10b'-tetrahydrodispiro[indoline-3,3'-pyrrolo[2,1-a]isoquinoline-2',3''-pyrrolidine]-2,2'',5''-trione (4g).*

White solid (0.39g, 69%); mp 234-236 °C; <sup>1</sup>H NMR: δ 2.43 (s, 3H, CH<sub>3</sub>), 2.65 (d, 1H, H-4'', J = 18.9 Hz), 2.77-3.15 (m, 5H, H-4'', H-5' and H-6'), 4.34 (d, 1H, H-1', J = 9.9 Hz), 5.58 (d, 1H, H-10b', J = 9.9 Hz), 6.73-7.44 (m, 16H, Ar-H); <sup>13</sup>C NMR: δ 21.2, 29.7, 37.1, 43.1, 54.9, 61.1, 63.2, 76.1, 109.3, 122.8, 124.3, 124.8, 125, 125.7, 126.3, 127.1, 128, 128.2, 129.7, 132.9, 135, 137.6, 141.1, 173.2, 177.7; Anal Calcd for C<sub>35</sub>H<sub>28</sub>ClN<sub>3</sub>O<sub>3</sub>: C, 73.23; H, 4.92; N, 7.32 %; found: C, 73.13; H, 5.02; N, 7.42 %.

*(1'S\*,2'S\*,3S\*,10b'S\*)-6-chloro-1''-phenyl-2'-(p-tolyl)-6',10b'-dihydro-2'H,5'H-dispiro[indoline-3,3'-pyrrolo[2,1-a]isoquinoline-1',3''-pyrrolidine]-2,2'',5''-trione (5g).*

White solid (0.08g, 14%); mp 200-202°C; <sup>1</sup>H NMR: δ 2.28 (s, 3H, CH<sub>3</sub>), 2.89-3.17 (m, 4H, H-5' and H-6'), 3.30 (dd, 2H, H-4''), 4.57 (s, 1H, H-2'), 5.79 (s, 1H, H-10b'), 6.68-7.63 (m, 16H, Ar-H), <sup>13</sup>C NMR: δ 20.5, 30.3, 39.8, 41.4, 55.4, 61.7, 69.3, 74.3, 110.5, 123.2, 125, 125.5, 125.7, 126.7, 128.1, 128.5, 129.2, 129.5, 129.8, 131.2, 137.8, 139.6, 140.8, 174.1, 179.1, Anal Calcd for C<sub>35</sub>H<sub>28</sub>ClN<sub>3</sub>O<sub>3</sub>: C, 73.23; H, 4.92; N, 7.32 %; found: C, 73.19; H, 5.06; N, 7.44 %.

*(1'R\*,2'R\*,3R\*,10b'R\*)-1'-(p-anisyl)-6-chloro-1''-phenyl-1',5',6',10b'-tetrahydrodispiro[indoline-3,3'-pyrrolo[2,1-a]isoquinoline-2',3''-pyrrolidine]-2,2'',5''-trione (4h).*

White solid (0.44g, 76%); mp 266-268°C; <sup>1</sup>H NMR: δ 2.58 (d, 1H, H-4'', J = 18.9 Hz), 2.73-3.25 (m, 5H, H-4'', H-5' and H-6'), 3.89 (s, 3H, OCH<sub>3</sub>), 4.34 (d, 1H, H-1', J = 9.3 Hz), 5.5 (d, 1H, H-10b', J = 9.3 Hz), 6.76-7.44 (m, 16H, Ar-H), 8.57 (bs, 1H, NH); <sup>13</sup>C NMR: δ 29.1, 36.7, 42.5, 54.8, 60.9, 62.8, 76.1, 110.7, 114.6, 124.2, 125.2, 125.7, 125.9, 127.3, 128.1, 128.2, 128.4, 128.5, 129.9, 130.9, 133.6, 139.8, 158.9, 173.2, 177.3; Anal Calcd for C<sub>35</sub>H<sub>28</sub>ClN<sub>3</sub>O<sub>4</sub>: C, 71.24; H, 4.78; N, 7.12 %; found: C, 71.32; H, 4.87; N, 7.22 %.

*(1'R\*,2'R\*,3R\*,10b'R\*)-6-chloro-1''-phenyl-1'-(pyridin-2-yl)-1',5',6',10b'-tetrahydrodispiro[indoline-3,3'-pyrrolo[2,1-a]isoquinoline-2',3''-pyrrolidine]-2,2'',5''-trione (4i).*

White solid (0.38g, 68%); mp 262-263°C; <sup>1</sup>H NMR: δ 2.55 (d, 1H, H-4'', J = 18.9 Hz), 2.73-3.14 (m, 5H, H-4'', H-5' and H-6'), 4.34 (d, 1H, H-1', J = 9.6 Hz), 5 (d, 1H, H-10b', J = 9.6 Hz), 6.76-7.44 (m, 16H, Ar-H), 8.57 (bs, 1H, NH); <sup>13</sup>C NMR: δ 29.6, 36.7, 43.1, 57.3, 60.8, 62.8, 76.5, 110.7, 122.7, 123.3, 124.2, 124.5, 125.2, 125.7, 126.5, 126.6, 127.9, 128.5, 128.8, 130.2, 131.6, 134.6, 137.6, 137.8, 141.6, 149.9, 160.8, 173.2, 177.2, 177.4; Anal Calcd for C<sub>33</sub>H<sub>25</sub>ClN<sub>4</sub>O<sub>3</sub>: C, 70.65; H, 4.49; N, 9.99 %; found: C, 70.72; H, 4.59; N, 10.05 %.

*(1'R\*,2'R\*,3R\*,10b'R\*)-6-bromo-1',1''-diphenyl-1',5',6',10b'-tetrahydrodispiro[indoline-3,3'-pyrrolo[2,1-a]isoquinoline-2',3''-pyrrolidine]-2,2'',5''-trione (4j).*

White solid (0.38g, 60%); mp 232-234°C; <sup>1</sup>H NMR: δ 2.45 (d, 1H, H-4'', J = 18.9Hz), 2.7-3.2 (m, 5H, H-4'', H-5' and H-6'), 4.35 (d, 1H, H-1', J = 9.6 Hz), 5.49 (d, 1H, H-10b', J = 9.6

Hz), 6.69-7.75 (m, 17H, Ar-H); <sup>13</sup>C NMR: δ 29.7, 37.3, 43, 54.9, 61.4, 63.7, 77.2, 111.5, 116.5, 124.5, 125.7, 126.2, 126.5, 126.6, 127.1, 128, 128.6, 128.9, 129, 130.1, 130.5, 131.3, 131.7, 133.4, 134.2, 137.2, 137.5, 140.5, 173.2, 176.9, 177.5; Anal Calcd for C<sub>34</sub>H<sub>26</sub>BrN<sub>3</sub>O<sub>3</sub> : C, 67.56; H, 4.34; N, 6.95%; found: C, 67.68; H, 4.22; N, 7.01 %.

*(1'R\*,2'R\*,3R\*,10b'R\*)-6-bromo-1''-phenyl-1''-(p-tolyl)-1',5',6',10b'-tetrahydrodispiro [indoline-3,3'-pyrrolo[2,1-a]isoquinoline-2',3''-pyrrolidine]-2,2'',5''-trione (4k).*

White solid (0.45g, 75%); mp 245-247 °C; <sup>1</sup>H NMR: δ 2.42 (s, 3H, CH<sub>3</sub>), 2.51 (d, 1H, H-4'', J = 18.9 Hz), 2.68-3.18 (m, 5H, H-4'', H-5' and H-6'), 4.33 (d, 1H, H-1', J = 9.2 Hz), 5.51 (d, 1H, H-10b', J = 9.2 Hz), 6.71-7.55 (m, 16H, Ar-H), 8.16 (bs, 1H, NH); <sup>13</sup>C NMR: δ 20.6, 29.2, 36.8, 42.5, 54.9, 61, 62.7, 76.6, 111.1, 115.8, 124.2, 125.1, 125.8, 128.1, 128.2, 128.5, 130, 130.9, 132.7, 137.3, 140.2, 173.2, 177.2; Anal Calcd for C<sub>35</sub>H<sub>28</sub>BrN<sub>3</sub>O<sub>3</sub> : C, 67.97; H, 4.56; N, 6.79 %; found: C, 68.02; H, 4.5; N, 6.71 %.

*(1'S\*,2'S\*,3S\*,10b'S\*)-6-bromo-1''-phenyl-2''-(p-tolyl)-6',10b'-dihydro-2'H,5'H-dispiro[indoline-3,3'-pyrrolo[2,1-a]isoquinoline-1',3''-pyrrolidine]-2,2'',5''-trione (5k).*

White solid (0.08g, 13%); mp 200-202°C; <sup>1</sup>H NMR: δ 2.26 (s, 3H, CH<sub>3</sub>), 2.66-3.16 (m, 4H, H-5' and H-6'), 3.28 (dd, 2H, H-4''), 4.52 (s, 1H, H-2'), 5.7 (s, 1H, H-10b'), 6.57-7.78 (m, 16H, Ar-H), 8.1 (bs, 1H, NH); <sup>13</sup>C NMR: δ 20.5, 28.8, 39.7, 41.3, 55.4, 61.2, 69.4, 74.2, 110.8, 115.4, 123.1, 125.4, 125.7, 126.6, 127.7, 128, 128.5, 129.1, 129.5, 129.6, 131.3, 132.1, 135.3, 137.7, 139.9, 174.1, 177.6, 179.1, Anal Calcd for C<sub>35</sub>H<sub>28</sub>BrN<sub>3</sub>O<sub>3</sub> : C, 67.97; H, 4.56; N, 6.79 %; found: C, 68.07; H, 4.66; N, 6.85 %.

*(1'R\*,2'R\*,3R\*,10b'R\*)-1''-(p-anisyl)-6-bromo-1''-phenyl-1',5',6',10b'-tetrahydrodispiro [indoline-3,3'-pyrrolo[2,1-a]isoquinoline-2',3''-pyrrolidine]-2,2'',5''-trione (4l).*

White solid (0.46g, 73%); mp 255-257°C; <sup>1</sup>H NMR: δ 2.57 (d, 1H, H-4'', J = 18.9 Hz), 2.72-3.2 (m, 5H, H-4'', H-5' and H-6'), 3.89 (s, 3H, OCH<sub>3</sub>), 4.34 (d, 1H, H-1', J = 9.6 Hz), 5.5 (d, 1H, H-10b', J = 9.6 Hz), 6.7-7.57 (m, 16H, Ar-H), 8.75 (bs, 1H, NH); <sup>13</sup>C NMR: δ 29.2, 37.2, 42.5, 54.6, 54.9, 60.9, 62.8, 76.6, 110.7, 114.6, 124.2, 125.2, 125.7, 125.9, 127.3, 128.1, 128.2, 128.4, 128.5, 129.8, 130.9, 133.9, 139.8, 160.9, 173.2, 177.8; Anal Calcd for C<sub>35</sub>H<sub>28</sub>BrN<sub>3</sub>O<sub>4</sub> : C, 66.25; H, 4.45; N, 6.62 %; found: C, 66.35; H, 4.51; N, 6.52 %.

*(1'S\*,2'S\*,3S\*,10b'S\*)-2''-(p-anisyl)-6-bromo-1''-phenyl-6',10b'-dihydro-2'H,5'H-dispiro [indoline-3,3'-pyrrolo[2,1-a]isoquinoline-1',3''-pyrrolidine]-2,2'',5''-trione (5l).*

White solid (0.07g, 12%); mp 210-212 °C; <sup>1</sup>H NMR: δ 2.65-3.27 (m, 4H, H-5' and H-6'), 3.28 (dd, 2H, H-4''), 3.74 (s, 3H, OCH<sub>3</sub>), 4.48 (s, 1H, H-2'), 5.69 (s, 1H, H-10b'), 6.62-7.8(m, 16H, Ar-H), 7.93 (bs, 1H, NH); <sup>13</sup>C NMR: 30.3, 40.2, 40.9, 55.2, 55.9, 65.8, 75, 109.6, 114.3, 123.7, 125.2, 125.8, 126.2, 128.4, 128.9, 129.6, 129.9, 131.7, 135.8, 141.3, 159.5, 174.1, 179.1, Anal Calcd for C<sub>35</sub>H<sub>28</sub>BrN<sub>3</sub>O<sub>4</sub> : C, 66.25; H, 4.45; N, 6.62 %; found: C, 66.45; H, 4.54; N, 6.72 %.

*(1'R\*,2'R\*,3R\*,10b'R\*)-6-bromo-1''-phenyl-1''-(pyridin-2-yl)-1',5',6',10b'-tetrahydrodispiro [indoline-3,3'-pyrrolo [2,1-a]isoquinoline-2',3''-pyrrolidine]-2,2'',5''-trione (4m).*

White solid (0.41g, 69%); mp 260-262 °C; <sup>1</sup>H NMR: δ 2.58 (d, 1H, H-4'', J = 18.9 Hz), 2.61-3.17 (m, 5H, H-4'', H-5' and H-6'), 4.34 (d, 1H, H-1', J = 9.6 Hz), 5.5 (d, 1H, H-10b', J = 9.6 Hz), 6.7-7.57 (m, 16H, Ar-H), 8.75 (bs, 1H, NH); <sup>13</sup>C NMR: δ 29.2, 37.3, 43, 54.9, 61.4, 63.7, 77.2, 109.7, 114.3, 123.3, 123.7, 125.2, 125.7, 126.2, 127, 128.4, 128.9, 129.6, 130.2, 131.6, 131.7, 135.8, 141.6, 160.9, 174.8, 179.8; Anal Calcd for C<sub>33</sub>H<sub>25</sub>BrN<sub>4</sub>O<sub>3</sub> : C, 65.46; H, 4.16; N, 9.25 %; found C, 65.58; H, 4.26; N, 9.14 %.

*(1'R\*,2'R\*,3R\*,10b'R\*)-1',1''-diphenyl-1',5',6',10b'-tetrahydro-2H-dispiro[acenaphthylene-1,3'-pyrrolo[2,1-a]isoquinoline-2',3''-pyrrolidine]-2,2'',5''-trione (4n).*

White solid (0.31g, 55%); mp 258-260°C; <sup>1</sup>H NMR: δ 2.42 (dd, 2H, H-4''), 2.54-3 (m, 4H, H-5' and H-6'), 4.4 (d, 1H, H-1', *J* = 9.6 Hz), 5.6 (d, 1H, H-10b', *J* = 9.6 Hz), 6.58-8.12 (m, 20H, Ar-H); <sup>13</sup>C NMR: δ 29.8, 36.6, 42.9, 56.7, 61.7, 63.6, 77.9, 121.3, 124.2, 124.8, 125.7, 126, 126.3, 128, 128.4, 128.7, 128.8, 129, 129.7, 130.2, 130.6, 131.3, 131.5, 132.5, 134.6, 134.9, 138, 138.6, 143.3, 173.3, 178.3, 207.1; Anal Calcd for C<sub>38</sub>H<sub>28</sub>N<sub>2</sub>O<sub>3</sub>: C, 81.41; H, 5.03; N, 5.00 %; found C, 81.31; H, 4.93; N, 5.14 %.

*(1'S\*,2'S\*,3S\*,10b'S\*)-1'',2'-diphenyl-6',10b'-dihydro-2H,2'H,5'H-dispiro[acenaphthylene-1,3'-pyrrolo[2,1-a]isoquinoline-1',3''-pyrrolidine]-2,2'',5''-trione (5n).*

White solid (0.09g, 17%); mp 214-216°C; <sup>1</sup>H NMR: δ 2.54-3.03 (m, 4H, H-5' and H-6'), 3.23 (dd, 2H, H-4''), 4.85 (s, 1H, H-2'), 5.72 (s, 1H, H-10b'), 6.8-8.01 (m, 20H, Ar-H); <sup>13</sup>C NMR: δ 30.2, 40.7, 42, 57.3, 61.2, 71, 78.4, 121.1, 123.9, 125.4, 125.9, 126.2, 127.1, 127.8, 128.2, 128.4, 128.7, 128.8, 128.97, 129.8, 130.4, 131.7, 133.9, 132.4, 133.9, 135.7, 142.6, 174.8, 179.9, 206.2; Anal Calcd for C<sub>38</sub>H<sub>28</sub>N<sub>2</sub>O<sub>3</sub>: C, 81.41; H, 5.03; N, 5.00 %; found C, 81.29; H, 5.13; N, 5.09 %.

*(1'S\*,2'S\*,3S\*,10b'S\*)-1''-phenyl-2'-(p-tolyl)-6',10b'-dihydro-2H,2'H,5'H-dispiro[acenaphthylene-1,3'-pyrrolo[2,1-a]isoquinoline-1',3''-pyrrolidine]-2,2'',5''-trione (5o).*

White solid (0.09g, 17%); mp 200-202°C; <sup>1</sup>H NMR: δ 1.64 (s, 3H, CH<sub>3</sub>), 2.27 (m, 4H, H-5' and H-6'), 3.31 (dd, 2H, H-4''), 4.62 (s, 1H, H-2'), 5.73 (s, 1H, H-10b'), 6.72-7.71 (m, 19H, Ar-H); <sup>13</sup>C NMR: δ 20.4, 29.9, 39.9, 41.3, 55.6, 61, 69.6, 74.1, 109.1, 122.7, 123.2, 124.7, 125.3, 125.7, 126.4, 127.3, 127.9, 128.4, 129, 129.3, 129.8, 130, 131.4, 133.8, 135.3, 137.4, 140.8, 174.3, 178, 206.1; Anal Calcd for C<sub>39</sub>H<sub>30</sub>N<sub>2</sub>O<sub>3</sub>: C, 81.51; H, 5.26; N, 4.87 %; found C, 81.61; H, 5.20; N, 4.94 %.

*(1'R\*,2'R\*,3R\*,10b'R\*)-1'-(p-anisyl)-1''-phenyl-1',5',6',10b'-tetrahydro-2H-dispiro[acenaphthylene-1,3'-pyrrolo[2,1-a]isoquinoline-2',3''-pyrrolidine]-2,2'',5''-trione (4p).*

White solid (0.3g, 52%); mp 251-253 °C; <sup>1</sup>H NMR: δ 2.54 (dd, 2H, H-4''), 2.63-3 (m, 4H, H-5' and H-6'), 3.9 (s, 3H, OCH<sub>3</sub>), 4.68 (d, 1H, H-1', *J* = 9.6 Hz), 5.63 (d, 1H, H-10b', *J* = 9.6 Hz), 6.7-8.21 (m, 19H, Ar-H); <sup>13</sup>C NMR: δ 29.4, 36, 42.3, 54.8, 55.7, 61.2, 63.1, 79.3, 114.6, 120.8, 123.7, 124.2, 125.1, 125.8, 127.9, 128.2, 128.3, 128.5, 130, 130.1, 130.8, 131.1, 132, 134.1, 134.5, 137.7, 142.8, 158.5, 172.9, 177.9, 207.2; Anal Calcd for C<sub>39</sub>H<sub>30</sub>N<sub>2</sub>O<sub>4</sub>: C, 79.30; H, 5.12; N, 4.74 %; found 79.50; H, 5; N, 4.81 %.

*(1'S\*,2'S\*,3S\*,10b'S\*)-2'-(p-anisyl)-1''-phenyl-6',10b'-dihydro-2H,2'H,5'H-dispiro[acenaphthylene-1,3'-pyrrolo[2,1-a]isoquinoline-1',3''-pyrrolidine]-2,2'',5''-trione (5p).*

White solid (0.09g,15%); mp 206-208°C; <sup>1</sup>H NMR: δ 2.6-3.07 (m, 4H, H-5' and H-6'), 3.38 (dd, 2H, H-4''), 3.75 (s, 3H, OCH<sub>3</sub>), 4.88 (s, 1H, H-2'), 5.79 (s, 1H, H-10b'), 6.61-8.09 (m, 19H, Ar-H); <sup>13</sup>C NMR: δ 33.8, 40.1, 41.5, 54.5, 54.9, 56.7, 70.4, 78, 113.6, 114.2, 121.1, 123.4, 125.4, 125.7, 125.9, 127.7, 127.9, 128.3, 128.4, 128.5, 129.3, 129.8, 131.1, 131.4, 131.6, 131.9, 134.9, 158.5, 174.3, 179.6, 204.1; Anal Calcd for C<sub>39</sub>H<sub>30</sub>N<sub>2</sub>O<sub>4</sub>: C, 79.30; H, 5.12; N, 4.74 %; found 79.41; H, 5.22; N, 4.69 %.

*(1'R\*,2'R\*,3R\*,10b'R\*)-1'-(p-chlorophenyl)-1''-phenyl-1',5',6',10b'-tetrahydro-2H-dispiro [acenaphthylene-1,3'-pyrrolo[2,1-a]isoquinoline-2',3''-pyrrolidine]-2,2'',5''-trione (4q).*

White solid (0.33g, 57%); mp 248-250°C; <sup>1</sup>H NMR: δ 2.34 (dd, 2H, H-4''), 2.48-3 (m, 4H, H-5' and H-6'), 4.39 (d, 1H, H-1', *J* = 9.3 Hz), 5.55 (d, 1H, H-10b', *J* = 9.3 Hz), 6.6-8.14 (m, 19H, Ar-H); <sup>13</sup>C NMR: δ 29.3, 36.1, 42.3, 55.5, 61, 63.4, 79.3, 120.9, 123.6, 124.1, 125.2, 125.6, 125.8, 126, 128, 128.3, 128.5, 129.4, 130.1, 130.7, 130.9, 131.1, 132.1, 133.5, 134.1, 136.9, 137.3, 142.9, 172.5, 177.6, 206.7; Anal Calcd for C<sub>38</sub>H<sub>27</sub>ClN<sub>2</sub>O<sub>3</sub>: C, 76.70; H, 4.57; N, 4.71 %; found C, 76.85; H, 4.61; N, 4.8 %.

*(1'S\*,2'S\*,3S\*,10b'S\*)-2'-(p-chlorophenyl)-1''-phenyl-6',10b'-dihydro-2H,2'H,5'H-dispiro [acenaphthylene-1,3'-pyrrolo[2,1-a]isoquinoline-1',3''-pyrrolidine]-2,2'',5''-trione (5q).*

White solid (0.04g, 6%); mp 198-200°C; <sup>1</sup>H NMR: δ 2.43-3.11 (m, 6H, H-5', H-6' and H-4''), 4.6 (s, 1H, H-2'), 5.9 (s, 1H, H-10b'), 6.73-8.47 (m, 19H, Ar-H); <sup>13</sup>C NMR: δ 30.8, 40.3, 40.7, 56.1, 54.9, 68, 72.3, 76.5, 120.8, 123.2, 124.4, 124.7, 125.8, 126.5, 127.1, 127.9, 128.5, 129, 129.6, 129.9, 130.2, 131, 131.3, 131.7, 131.9, 132.7, 133.4, 136.3, 137.1, 137.5, 140.6, 142.4, 169.6, 176.2, 209.3; Anal Calcd for C<sub>38</sub>H<sub>27</sub>ClN<sub>2</sub>O<sub>3</sub>: C, 76.70; H, 4.57; N, 4.71 %; found C, 76.82; H, 4.65; N, 4.81 %.

*(1'S\*,2'S\*,3S\*,10b'S\*)-1''-phenyl-2'-(pyridin-2-yl)-6',10b'-dihydro-2H,2'H,5'H-dispiro [acenaphthylene-1,3'-pyrrolo[2,1-a]isoquinoline-1',3''-pyrrolidine]-2,2'',5''-trione (5r).*

White solid (0.07g, 13%); mp 204-206 °C; <sup>1</sup>H NMR: δ 2.53-2.99 (m, 4H, H-5' and H-6'), 3.18 (dd, 2H, H-4''), 5 (s, 1H, H-2'), 5.6 (s, 1H, H-10b'), 6.55-8.13 (m, 19H, Ar-H); <sup>13</sup>C NMR: δ 30.1, 41.4, 42.4, 56.8, 52.9, 71.2, 76.3, 120.9, 121.4, 122.1, 122.7, 123.5, 125.5, 125.8, 126.3, 126.9, 128.3, 128.4, 128.5, 129, 129.7, 130.5, 130.9, 132.3, 133.5, 134.7, 135.2, 136.6, 137, 142.2, 149.1, 155, 175.2, 180.1, 204.2; Anal Calcd for C<sub>37</sub>H<sub>27</sub>N<sub>3</sub>O<sub>3</sub>: C, 79.13; H, 4.85; N, 7.48 %; found C, 79.23; H, 4.96; N, 7.4 %.

### 3.3. $^1\text{H}$ - and $^{13}\text{C}$ -NMR Spectra of compounds 4a-r and 5a-r (Fig. S1 to S36)

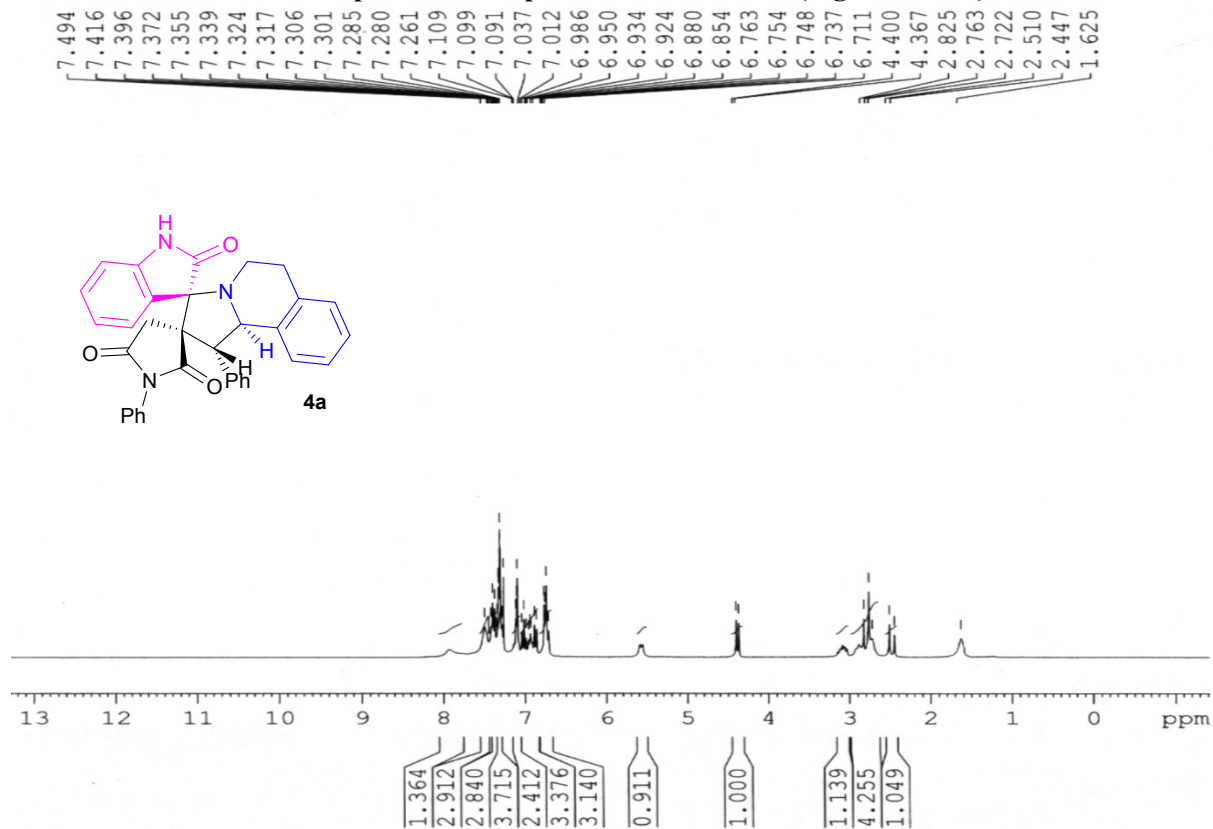

Fig. S1.  $^1\text{H}$  NMR spectrum of 4a in  $\text{CDCl}_3$

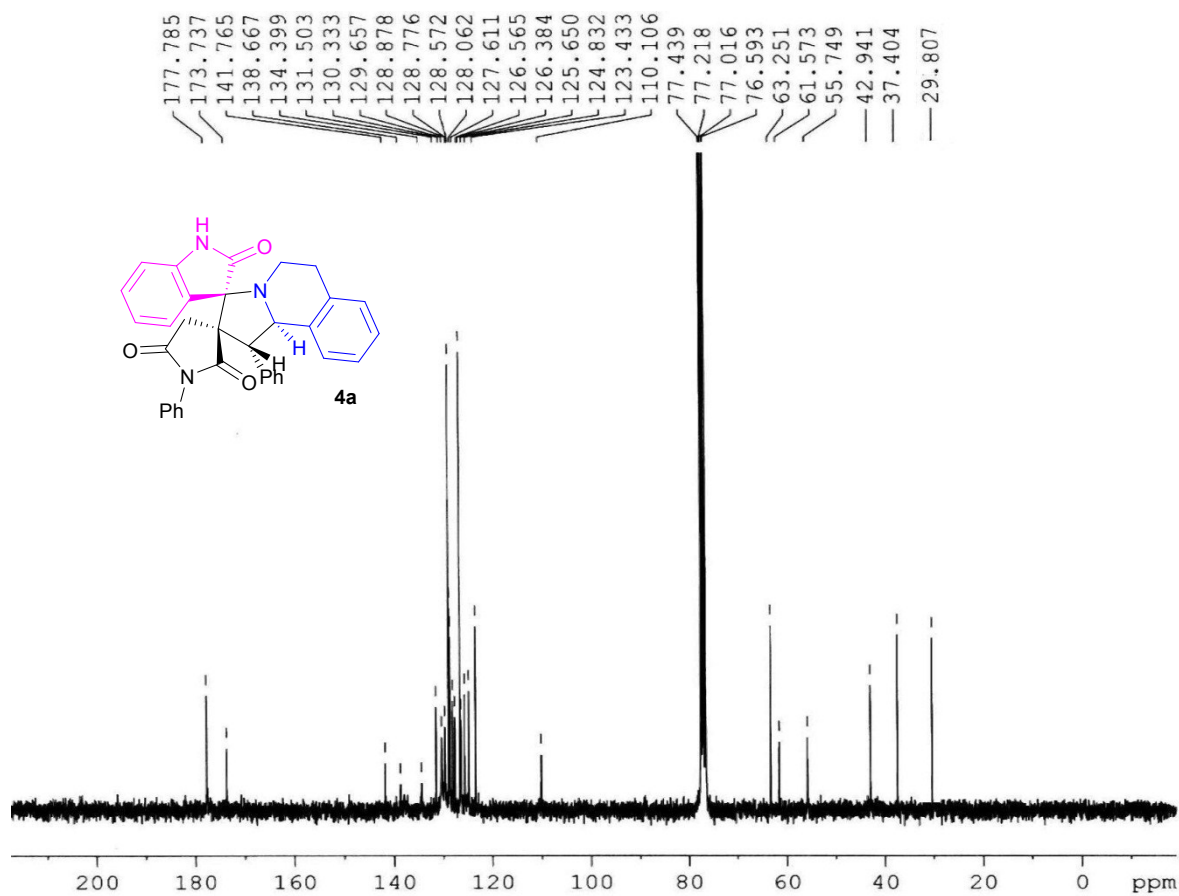

Fig. S2.  $^{13}\text{C}$  NMR spectrum of 4a in  $\text{CDCl}_3$



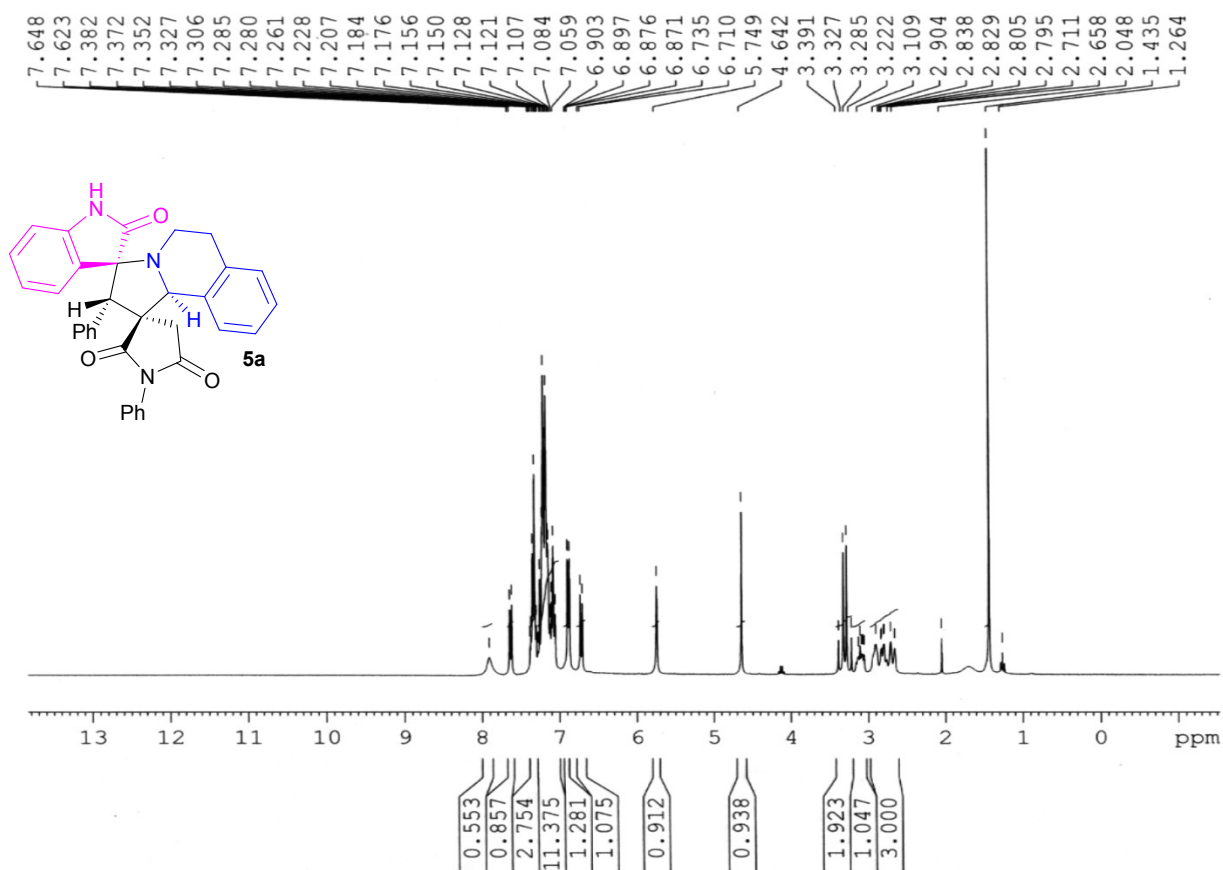

**Fig. S3.** <sup>1</sup>H NMR spectrum of **5a** in CDCl<sub>3</sub>

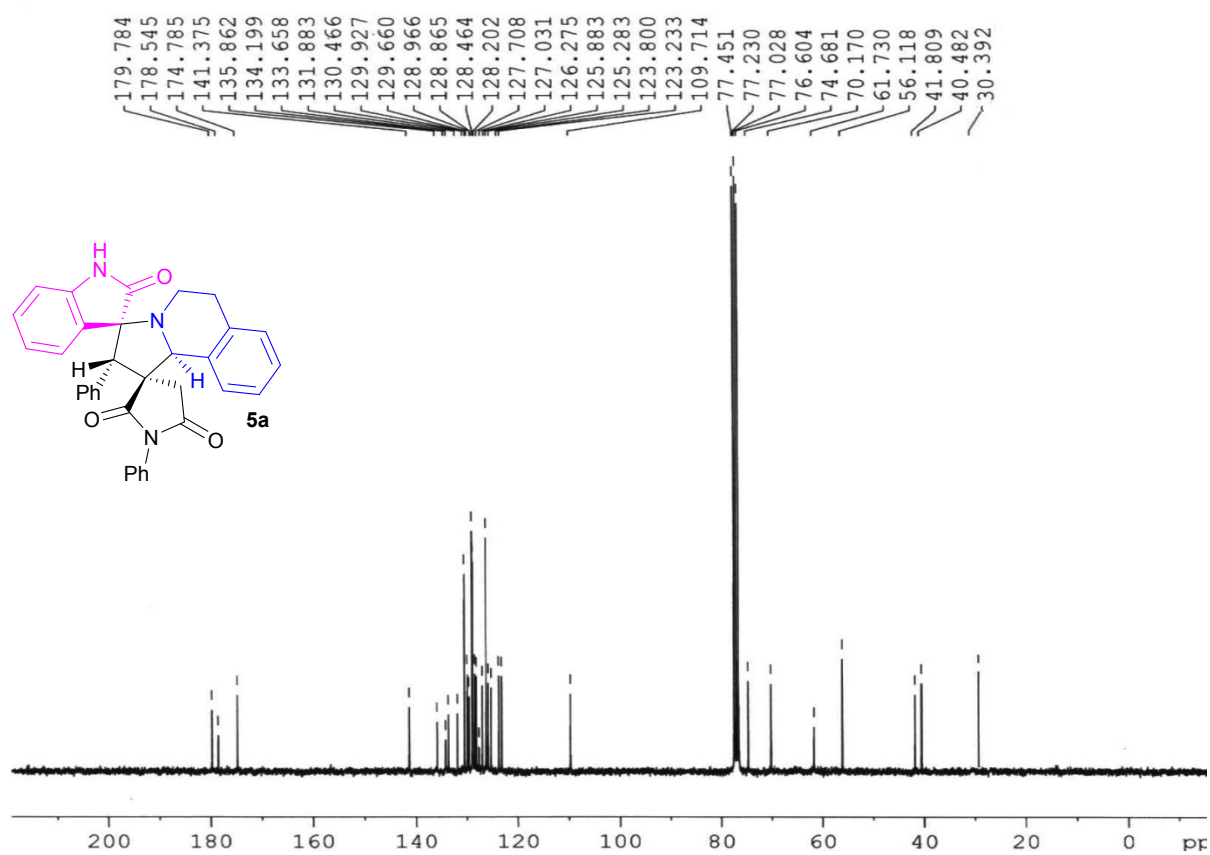

**Fig. S4.** <sup>13</sup>C NMR spectrum of **5a** in CDCl<sub>3</sub>

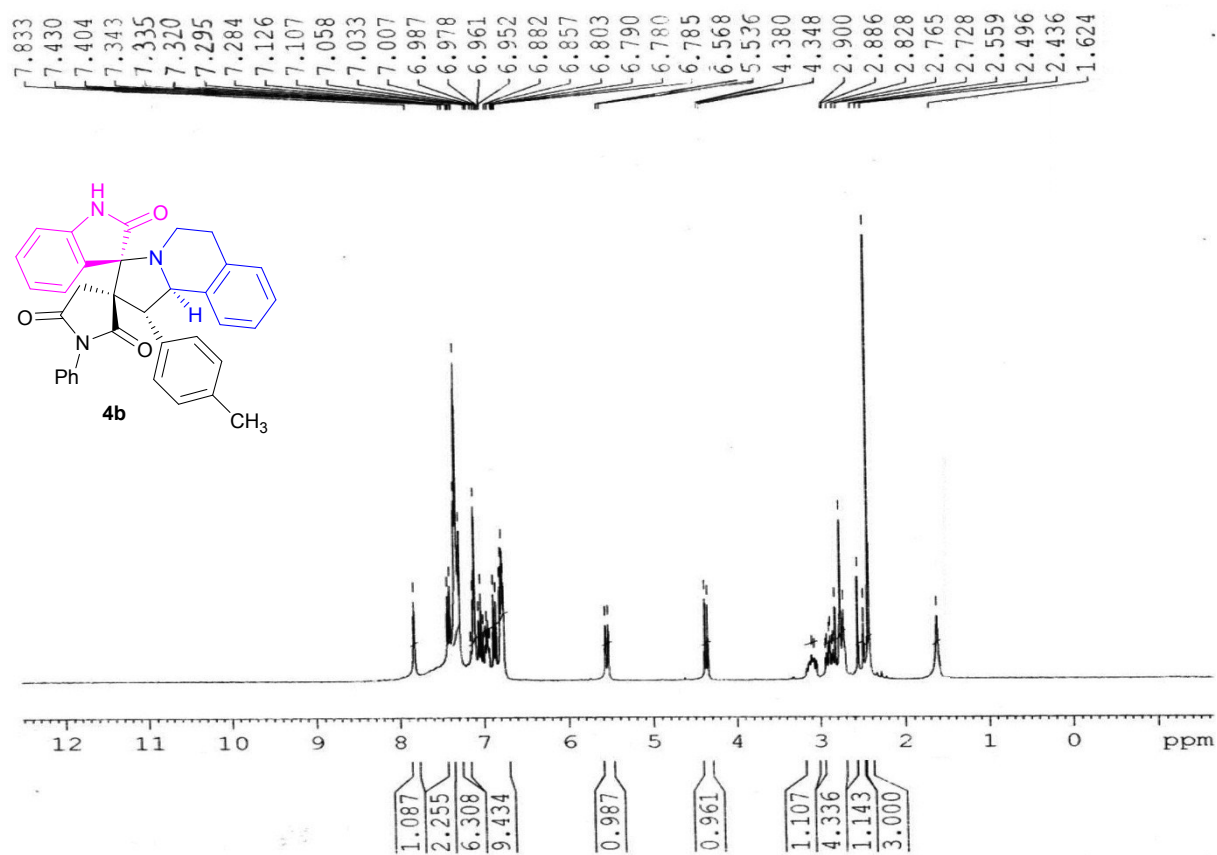

**Fig. S5.** <sup>1</sup>H NMR spectrum of **4b** in CDCl<sub>3</sub>

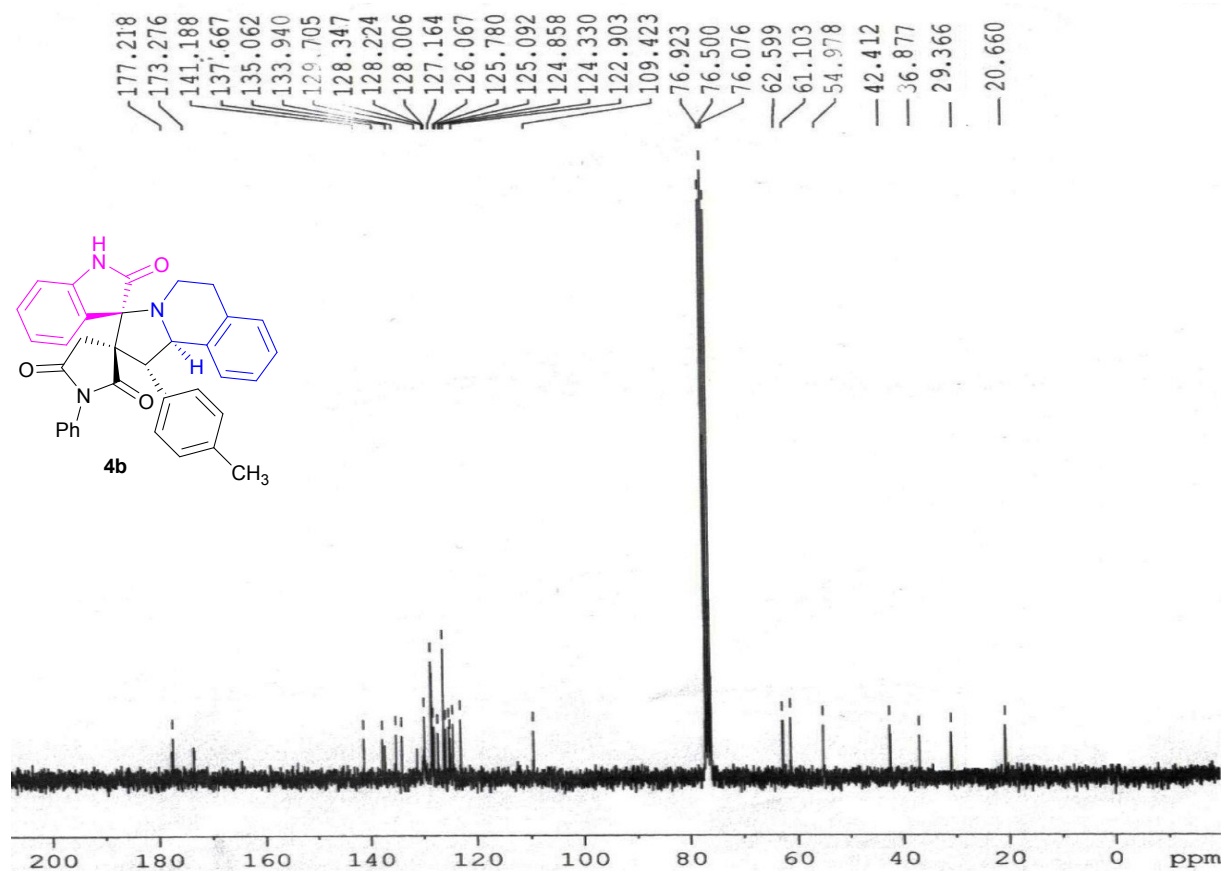

**Fig. S6.** <sup>13</sup>C NMR spectrum of **4b** in CDCl<sub>3</sub>

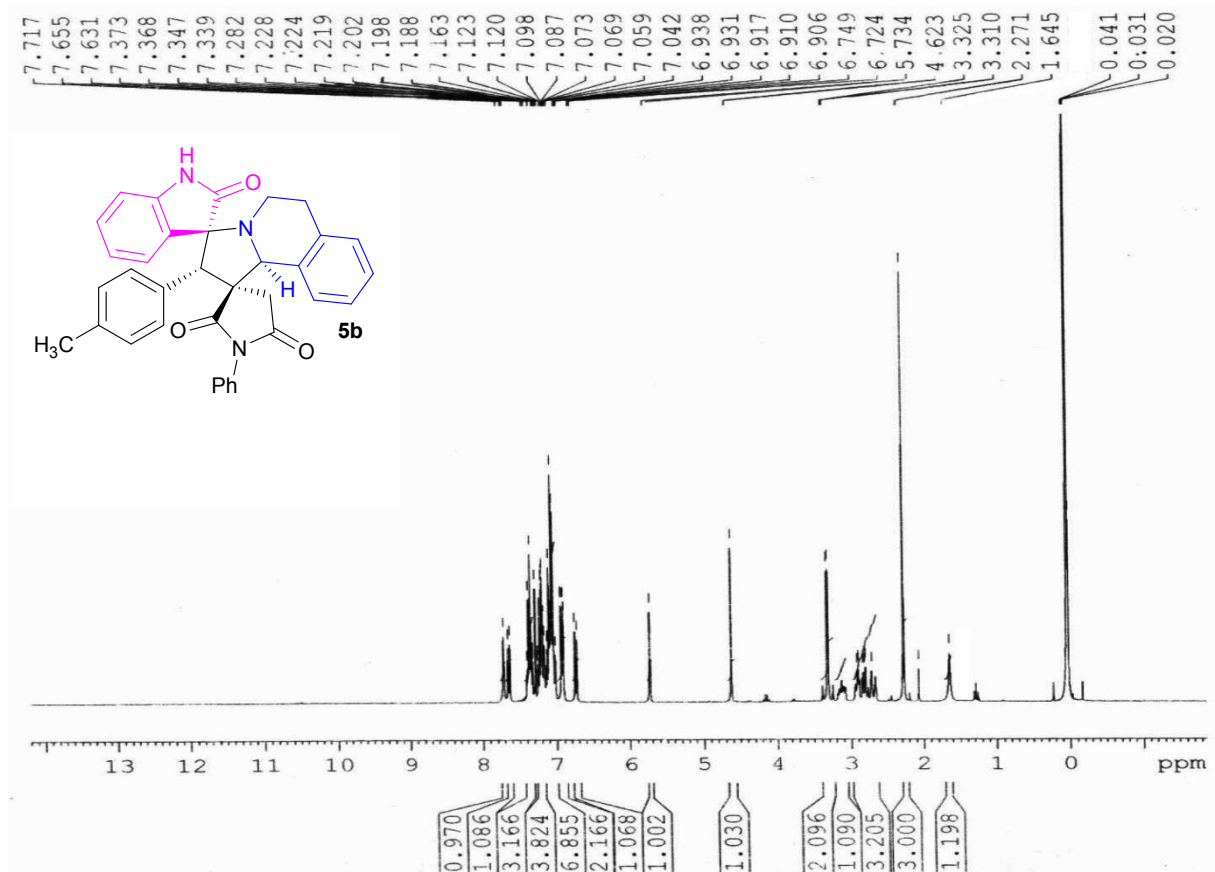

**Fig. S7.** <sup>1</sup>H NMR spectrum of **5b** in CDCl<sub>3</sub>

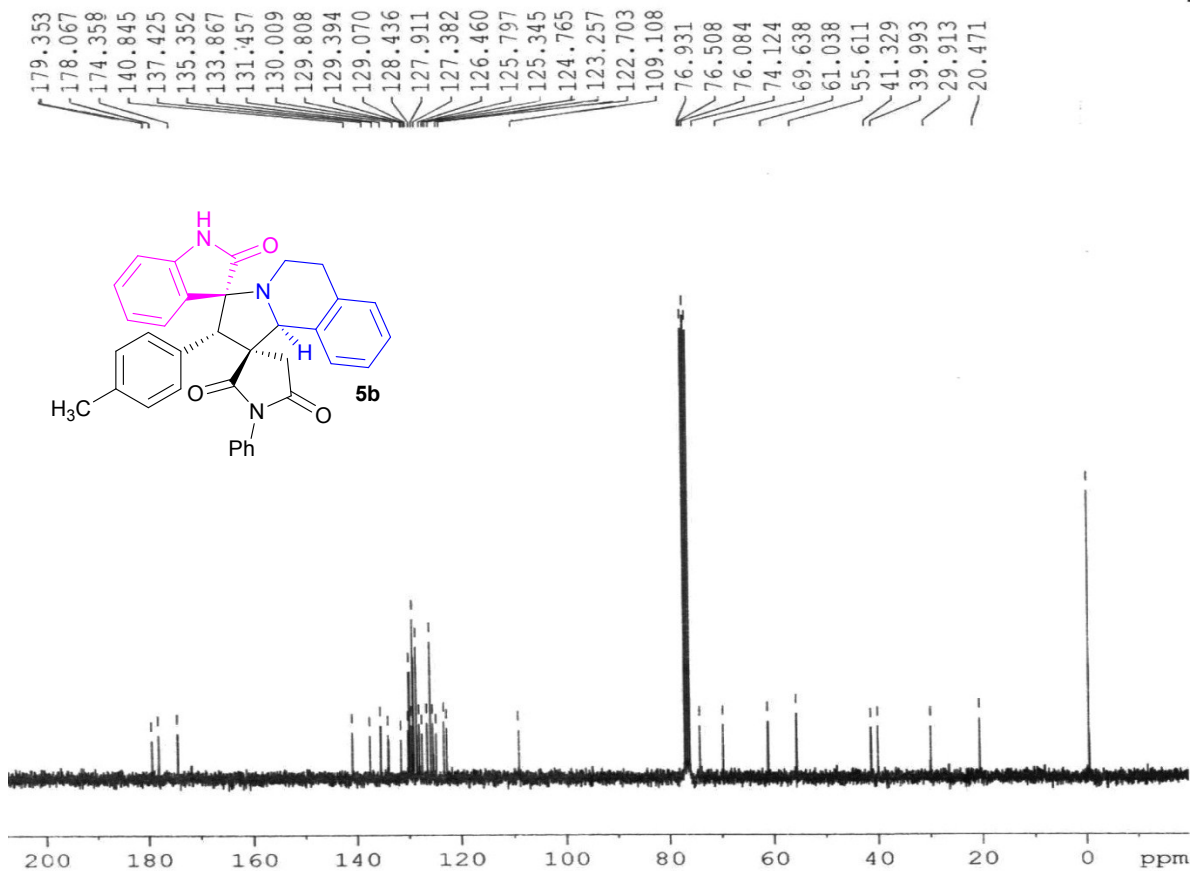

**Fig. S8.** <sup>13</sup>C NMR spectrum of **5b** in CDCl<sub>3</sub>

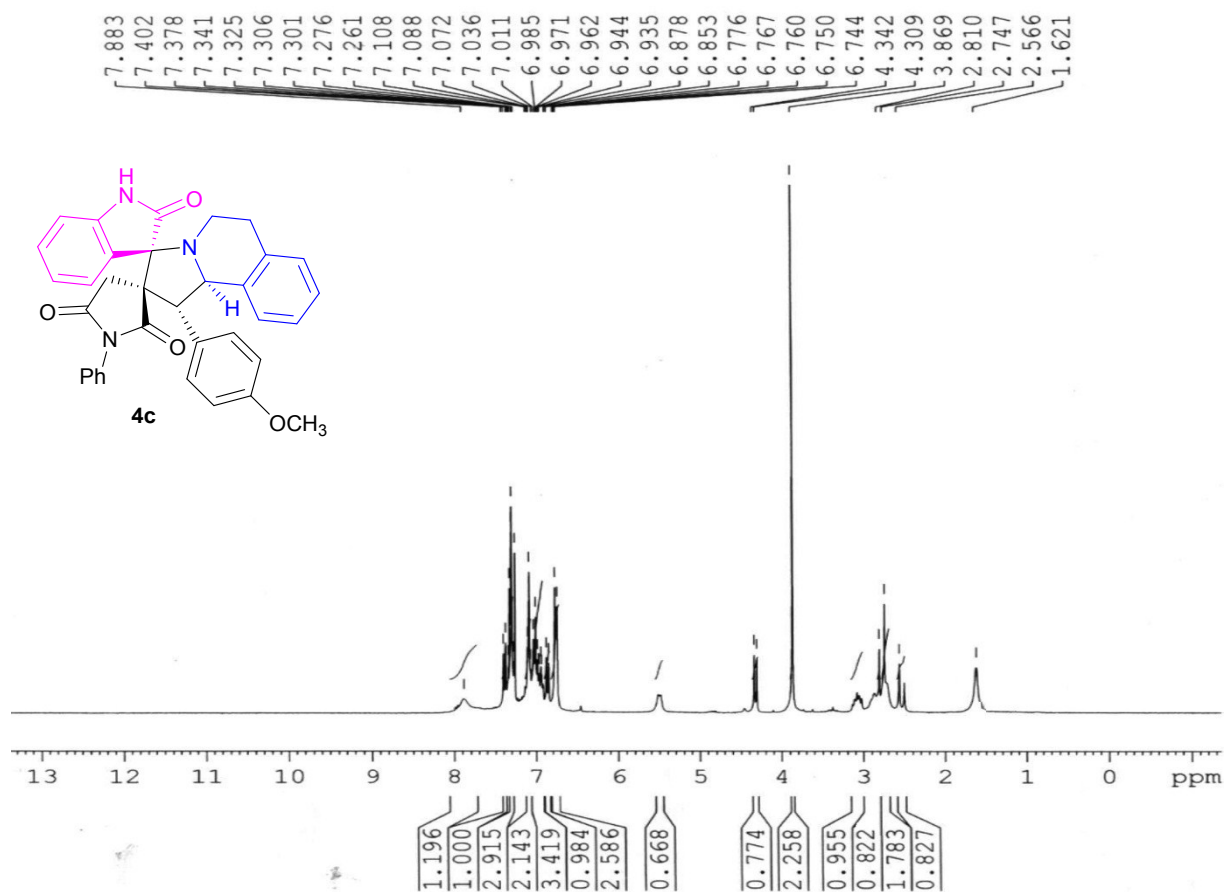

**Fig. S9.** <sup>1</sup>H NMR spectrum of **4c** in CDCl<sub>3</sub>

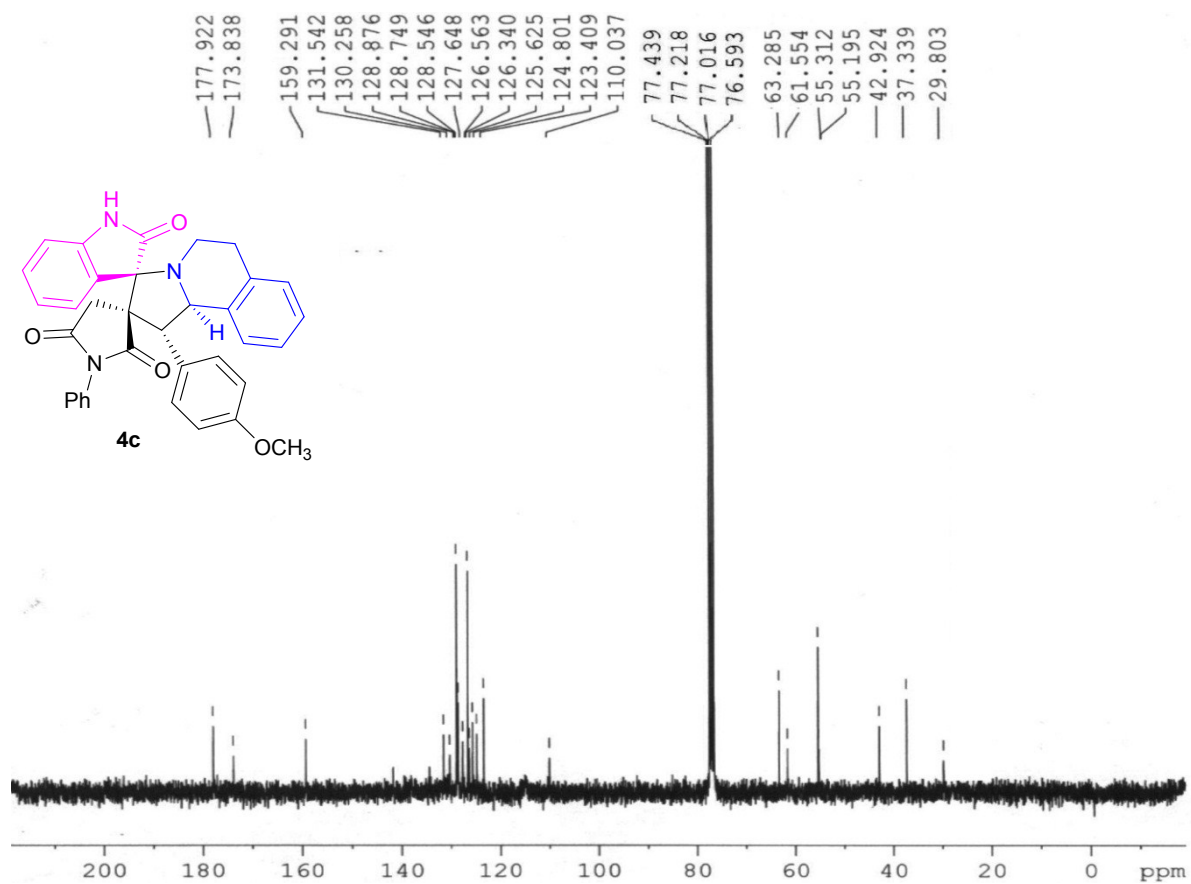

**Fig. S10.** <sup>13</sup>C NMR spectrum of **4c** in CDCl<sub>3</sub>

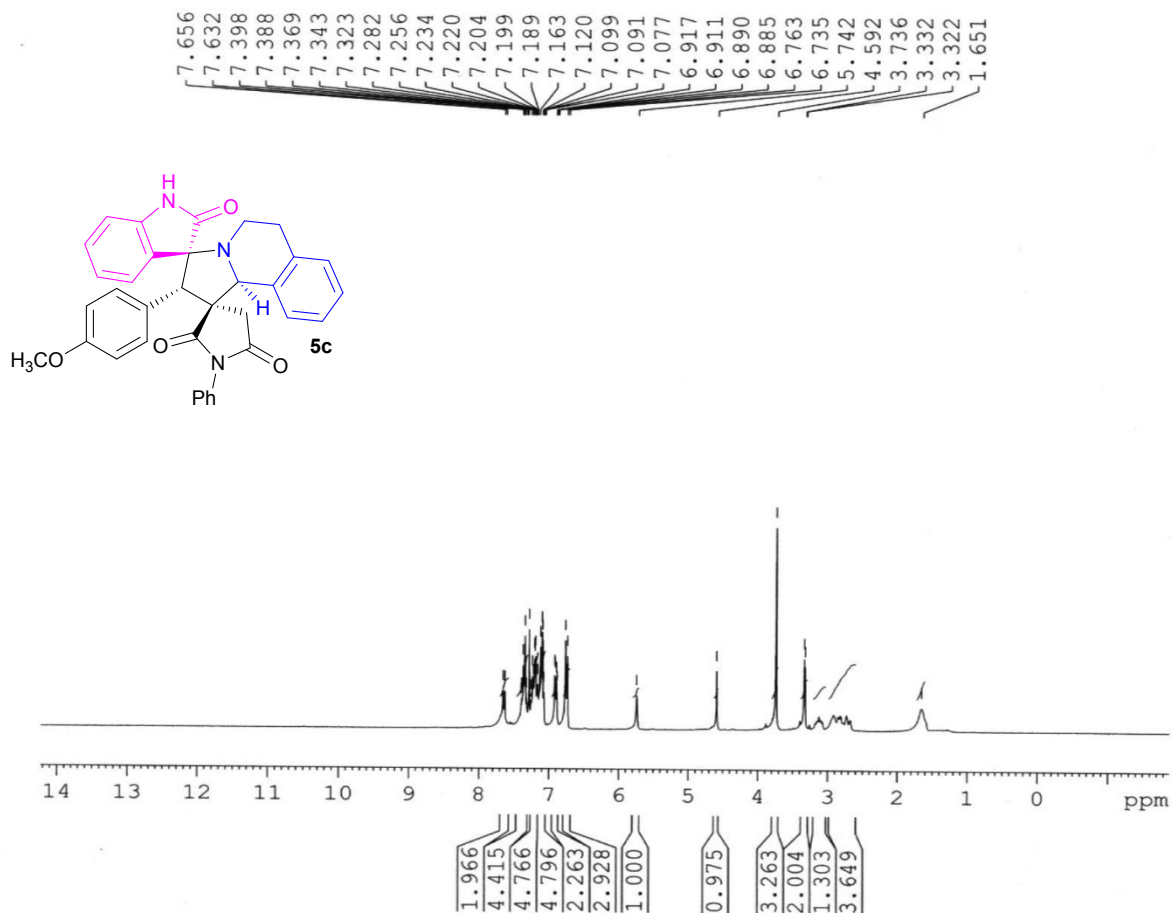

**Fig. S11.** <sup>1</sup>H NMR spectrum of **5c** in CDCl<sub>3</sub>

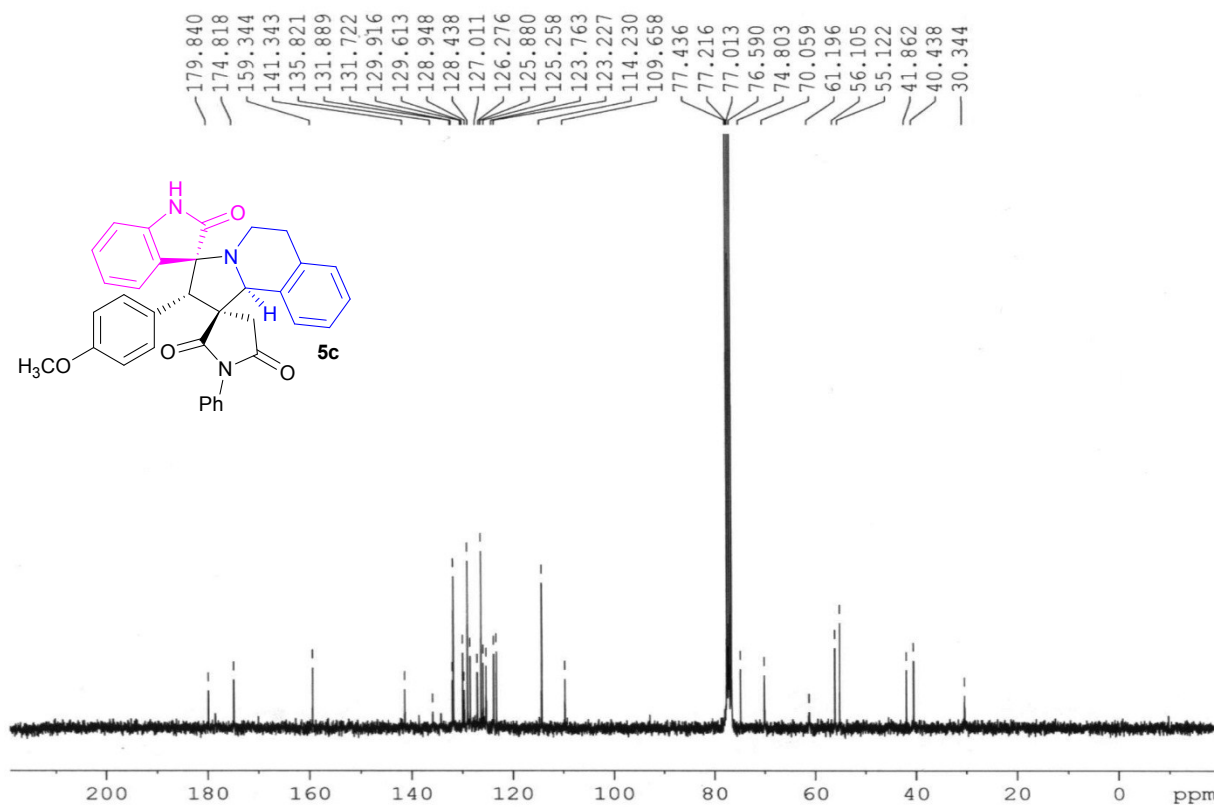

**Fig. S12.** <sup>13</sup>C NMR spectrum of **5c** in CDCl<sub>3</sub>

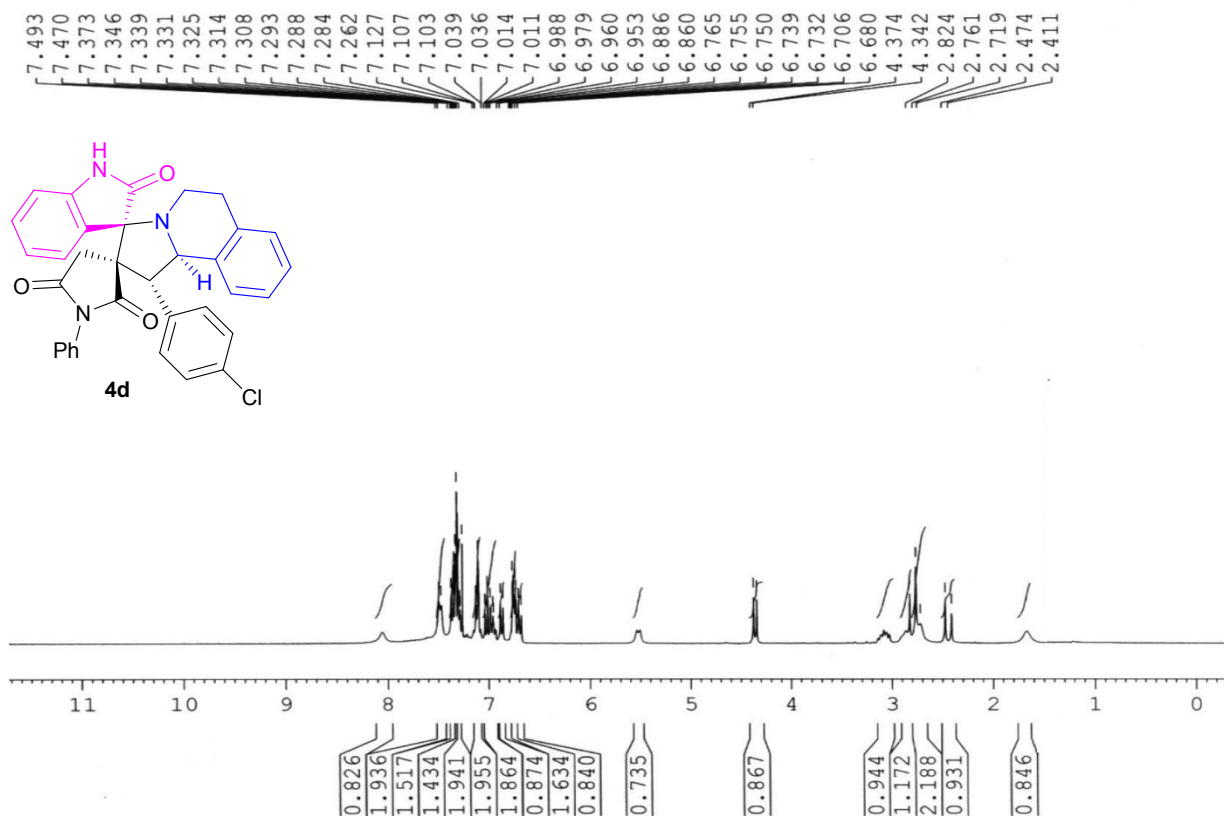

**Fig. S13.** <sup>1</sup>H NMR spectrum of **4d** in CDCl<sub>3</sub>

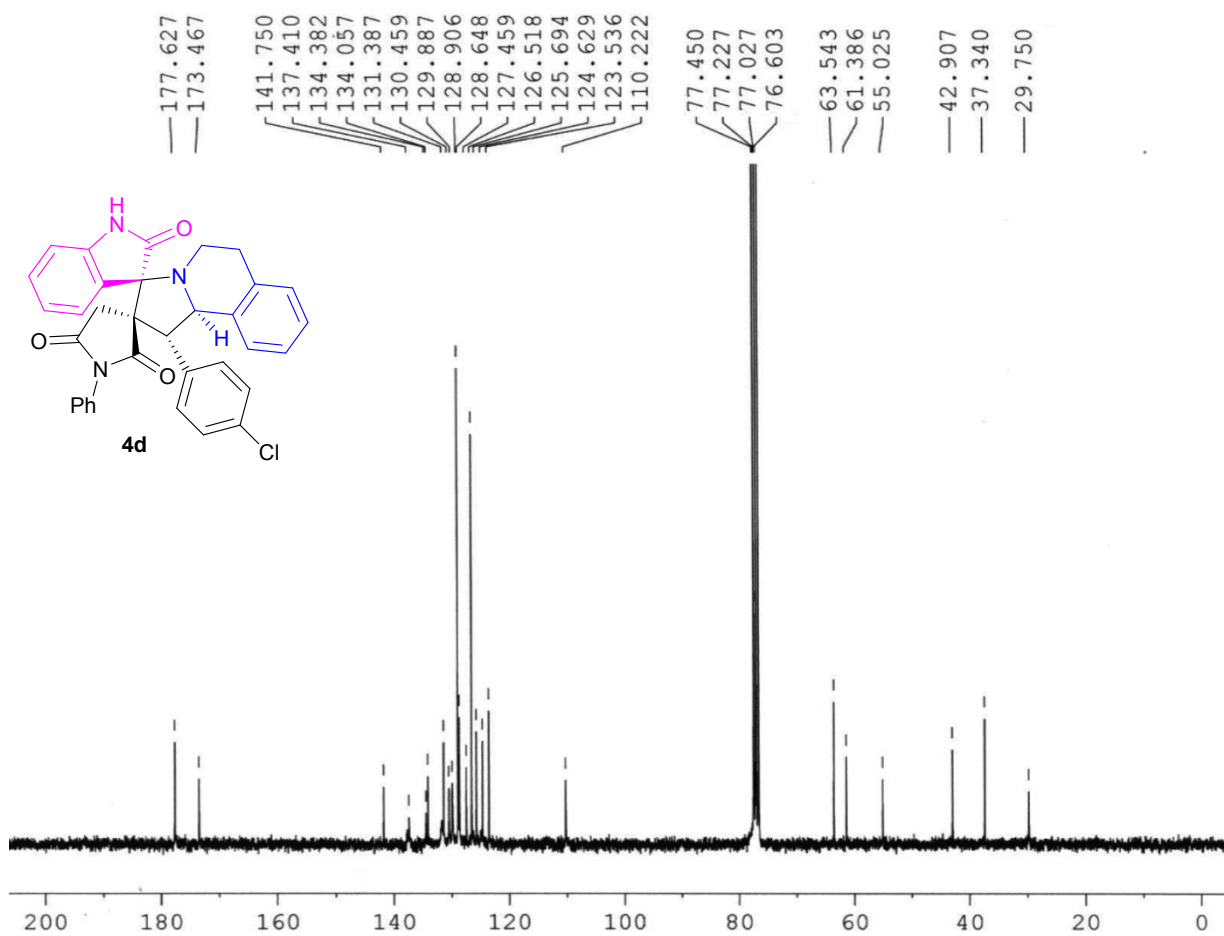

**Fig. S14.** <sup>13</sup>C NMR spectrum of **4d** in CDCl<sub>3</sub>

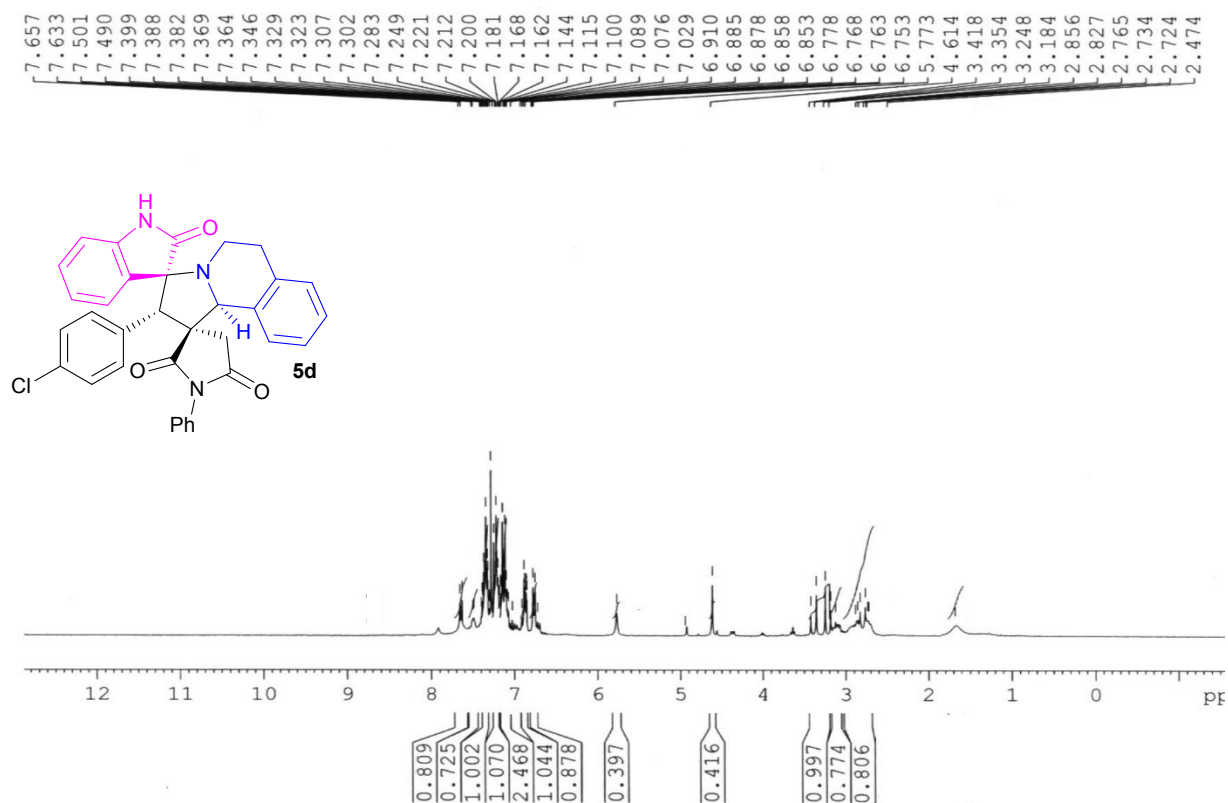

**Fig. S15.** <sup>1</sup>H NMR spectrum of **5d** in CDCl<sub>3</sub>

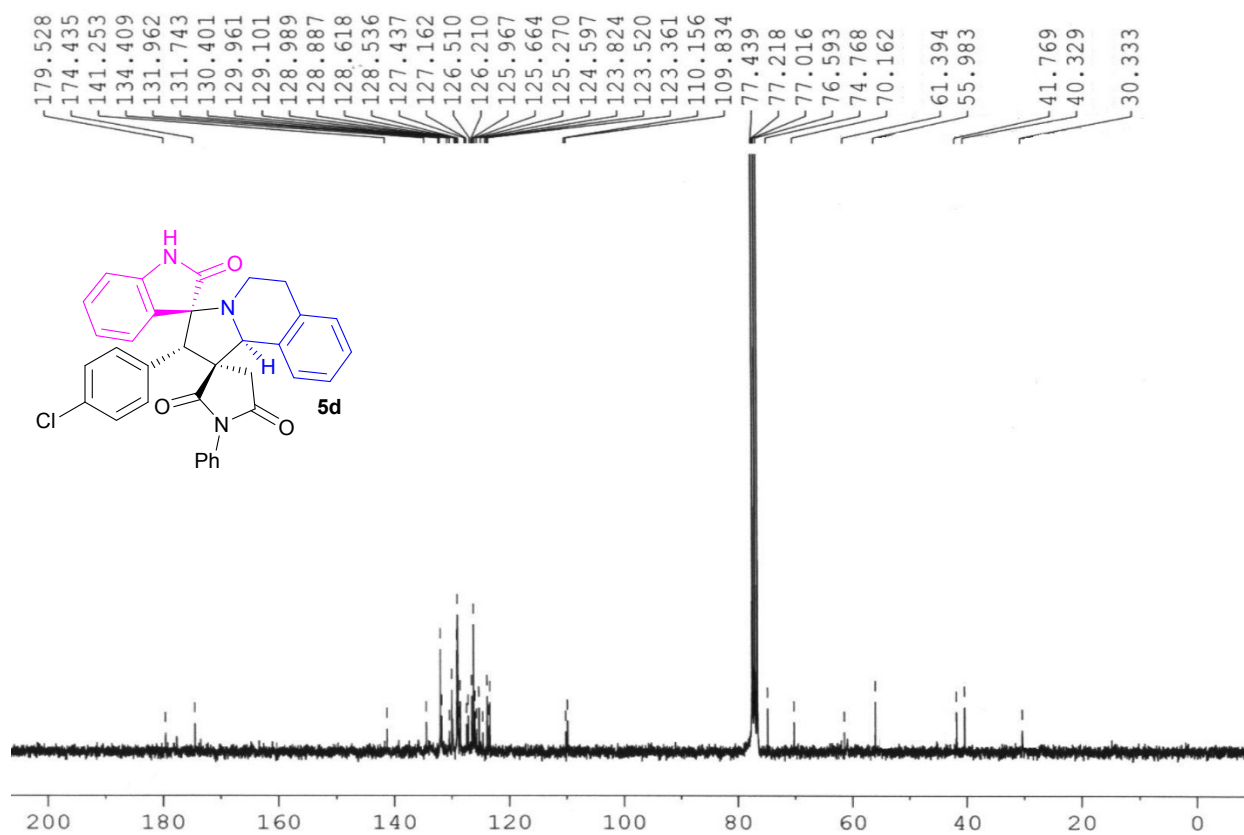

**Fig. S16.** <sup>13</sup>C NMR spectrum of **5d** in CDCl<sub>3</sub>

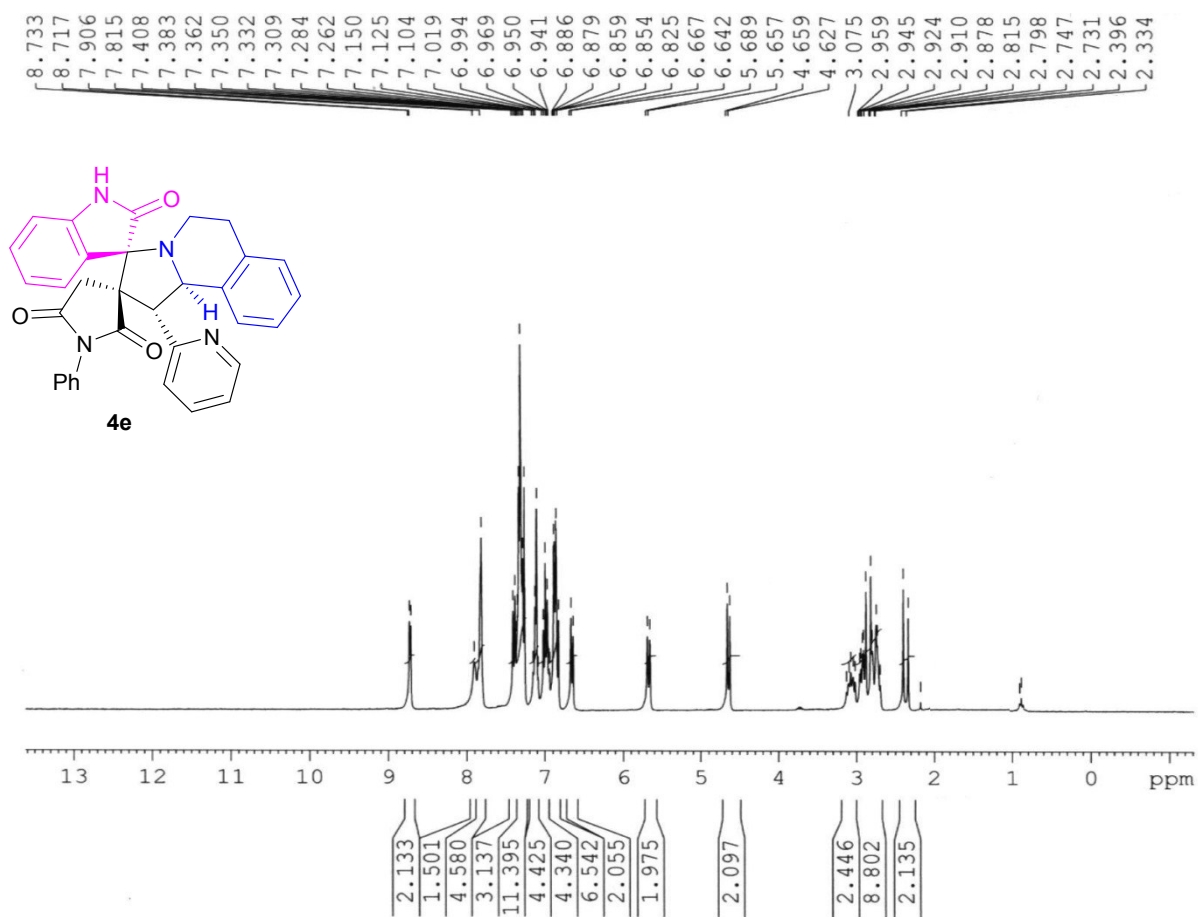

**Fig. S17.** <sup>1</sup>H NMR spectrum of **4e** in CDCl<sub>3</sub>

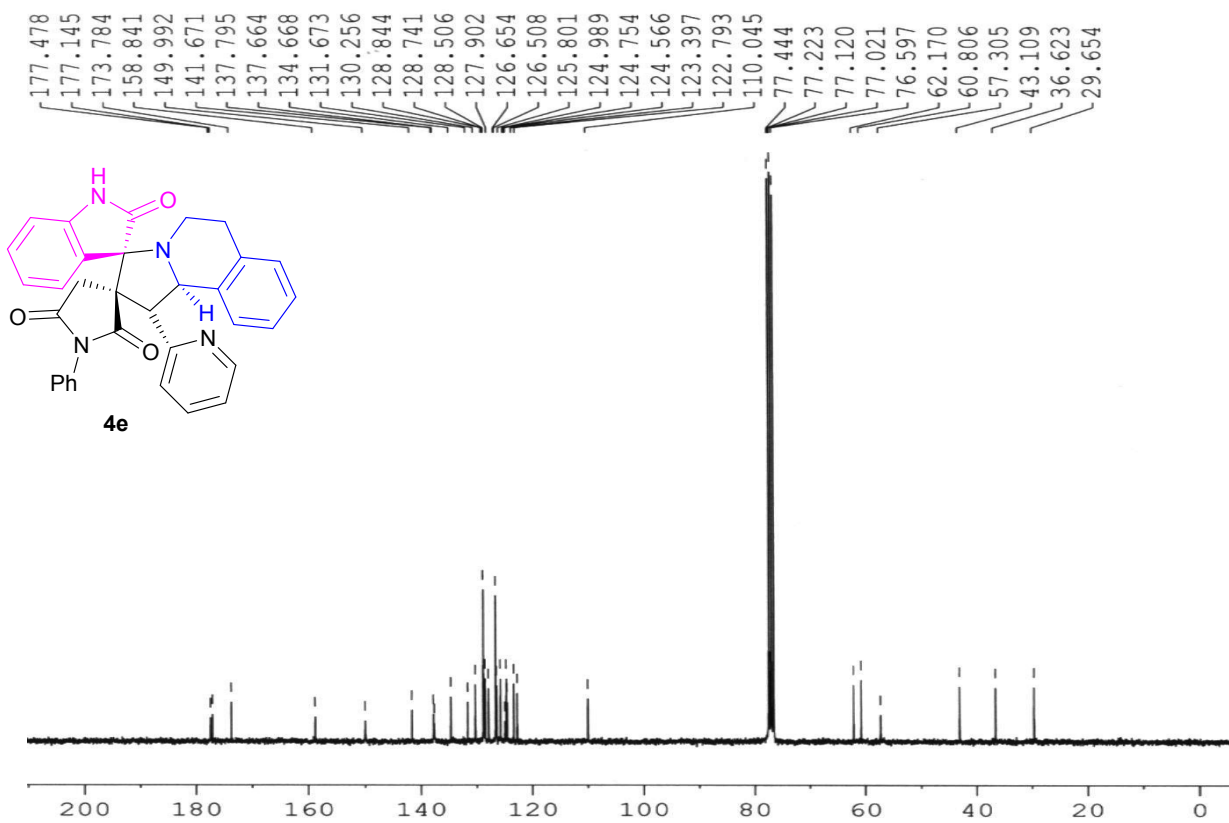

**Fig. S18.** <sup>13</sup>C NMR spectrum of **4e** in CDCl<sub>3</sub>



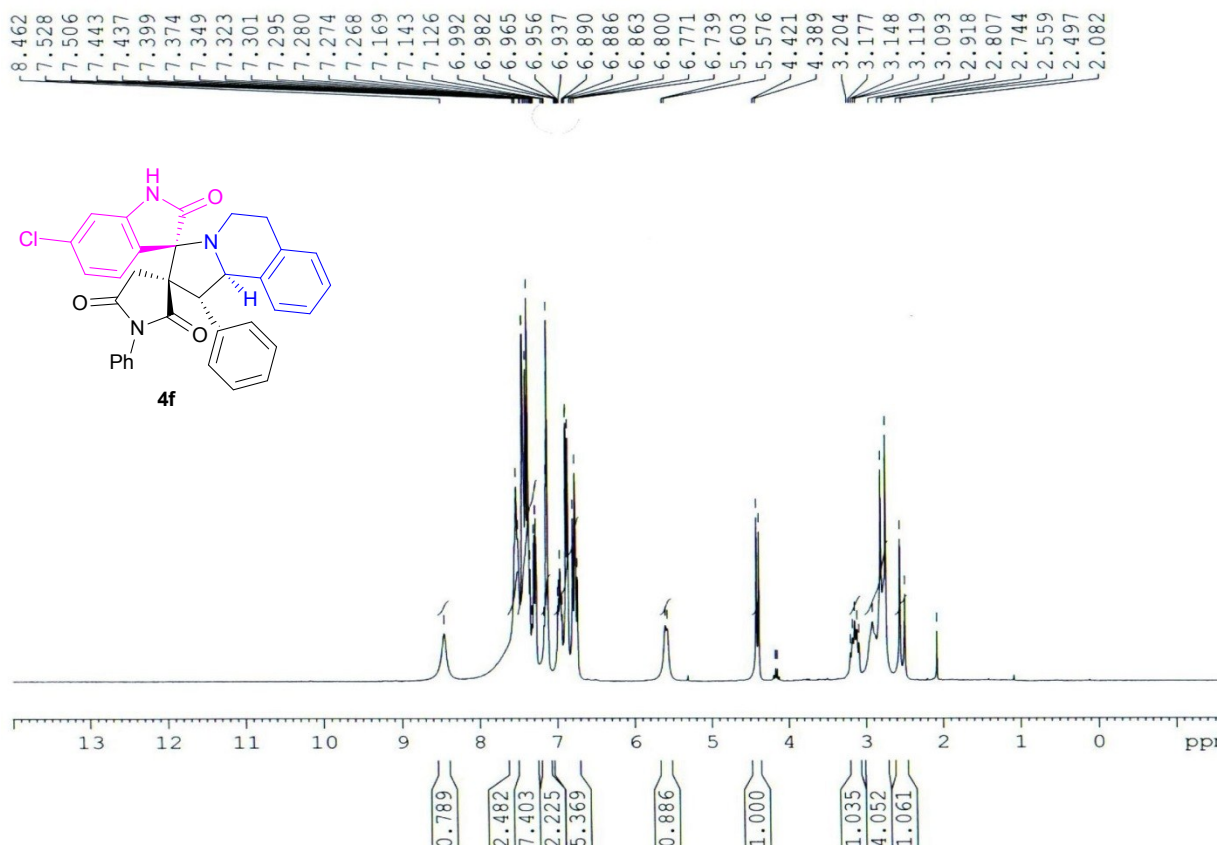

**Fig. S19.** <sup>1</sup>H NMR spectrum of **4f** in CDCl<sub>3</sub>

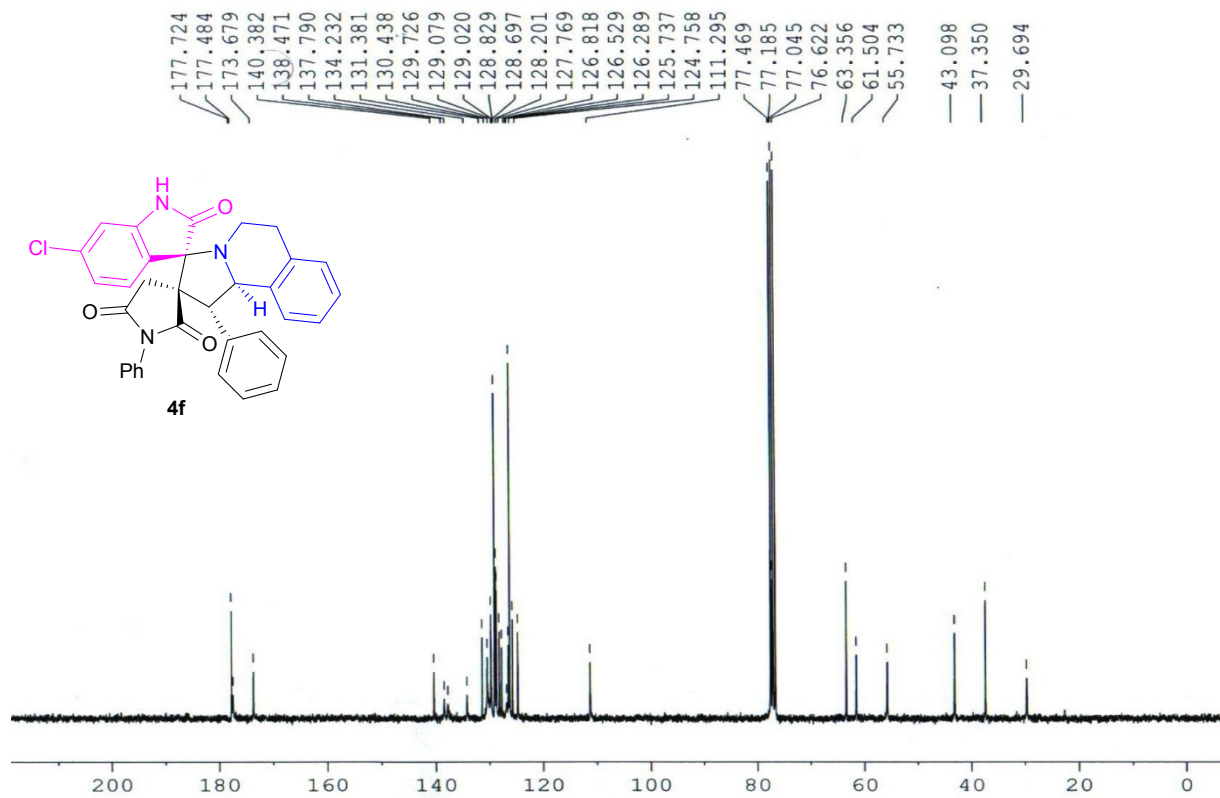

**Fig. S20.** <sup>13</sup>C NMR spectrum of **4f** in CDCl<sub>3</sub>

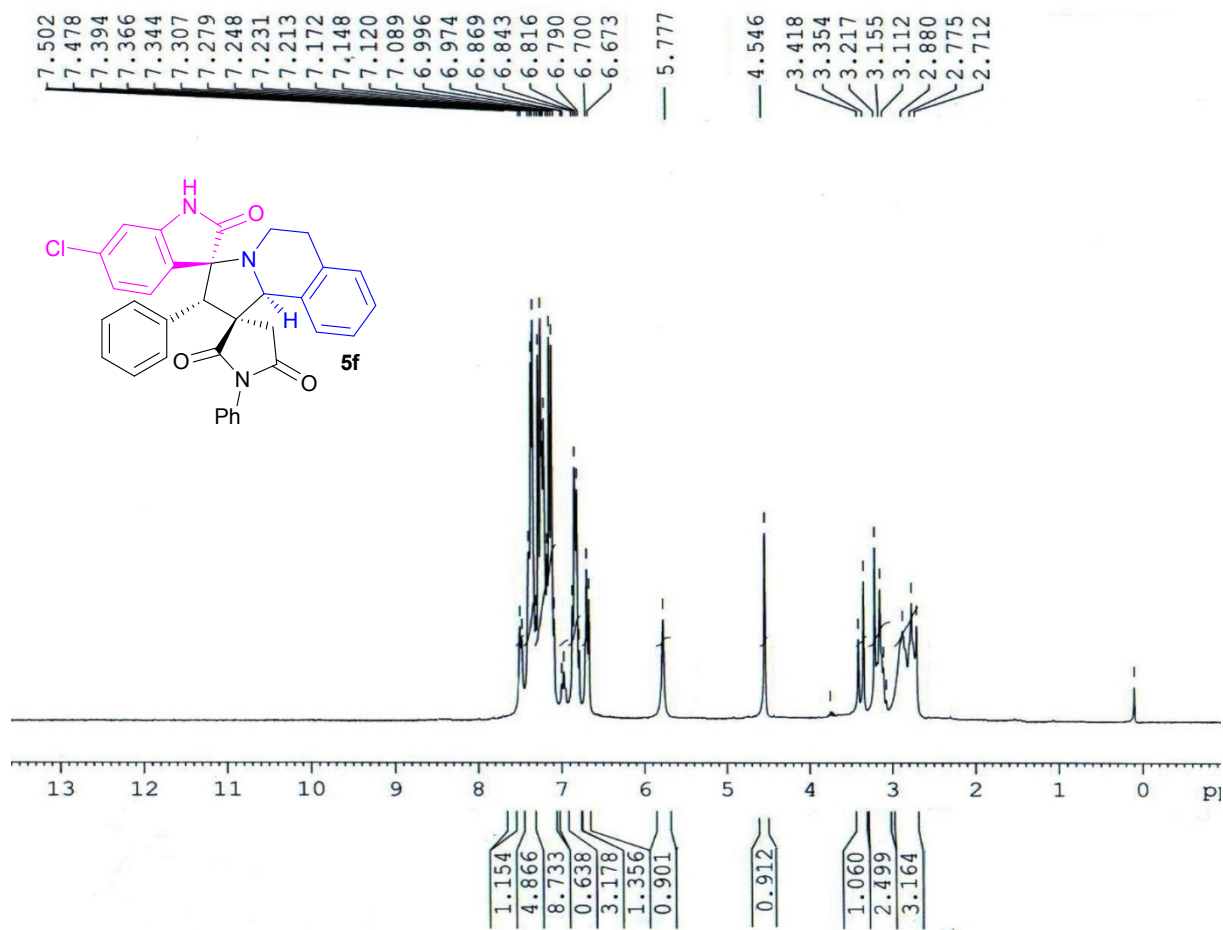

**Fig. S21.** <sup>1</sup>H NMR spectrum of **5f** in CDCl<sub>3</sub>

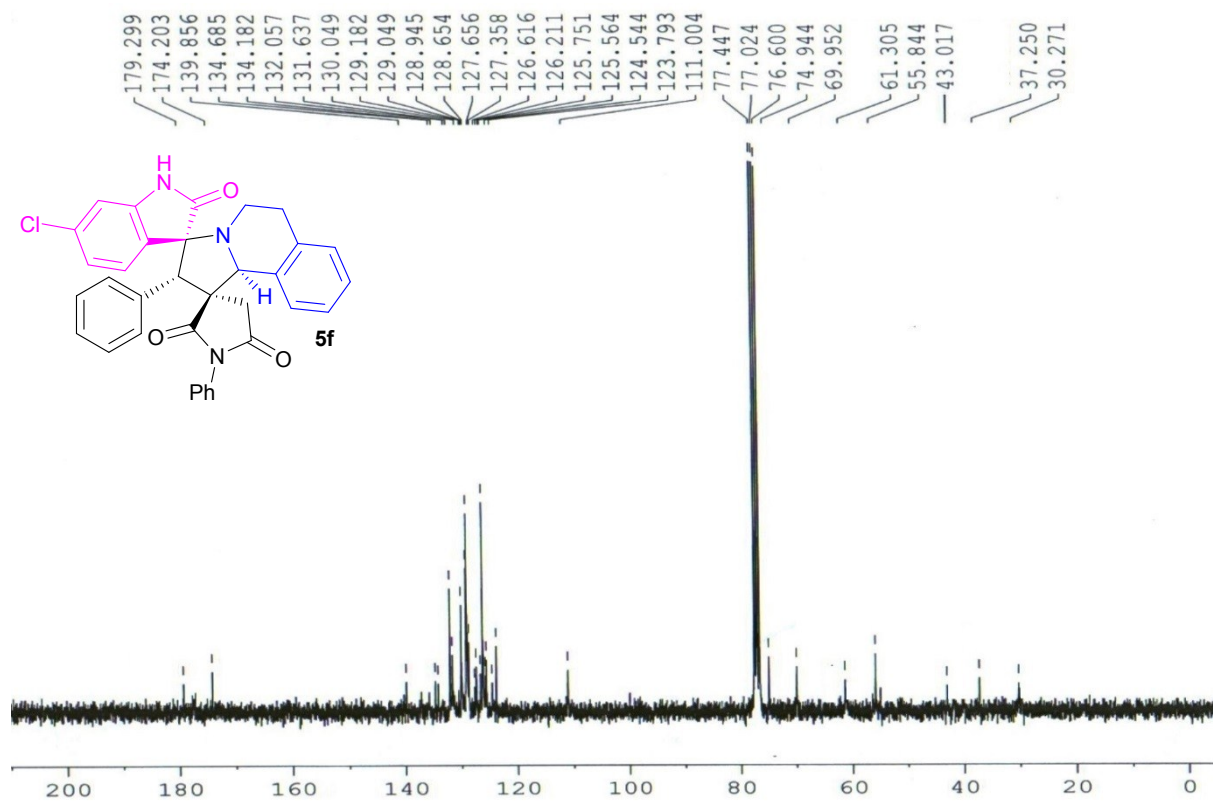

**Fig. S22.** <sup>13</sup>C NMR spectrum of **5f** in CDCl<sub>3</sub>

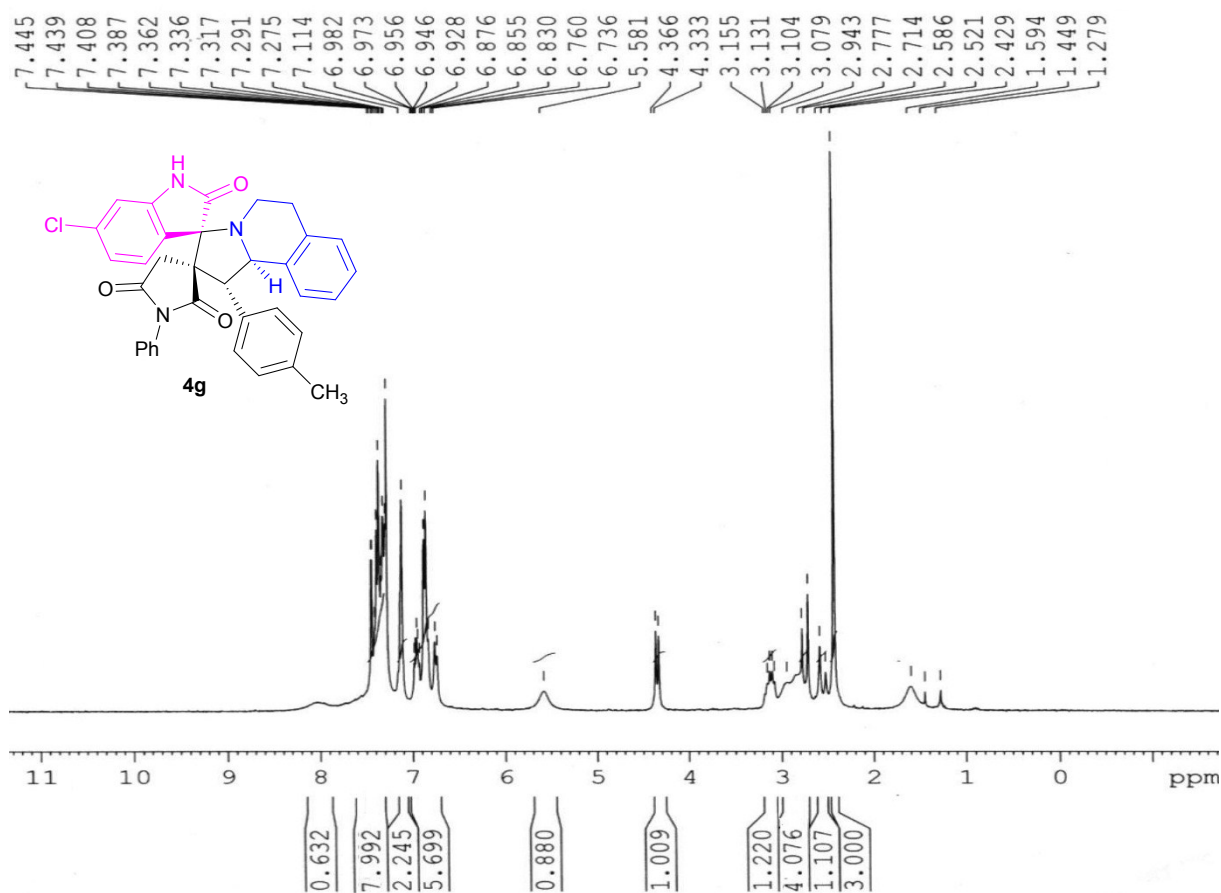

**Fig. S23.** <sup>1</sup>H NMR spectrum of **4g** in CDCl<sub>3</sub>

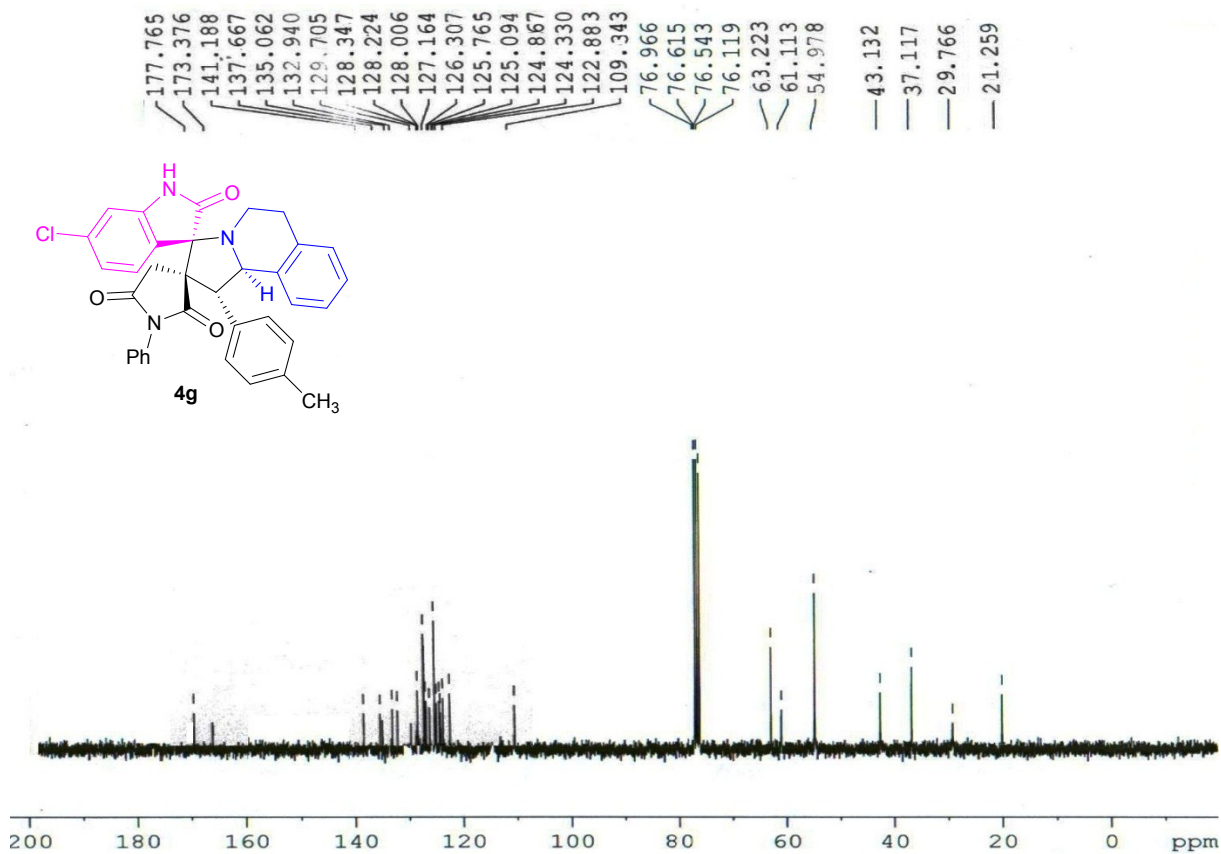

**Fig. S24.** <sup>13</sup>C NMR spectrum of **4g** in CDCl<sub>3</sub>

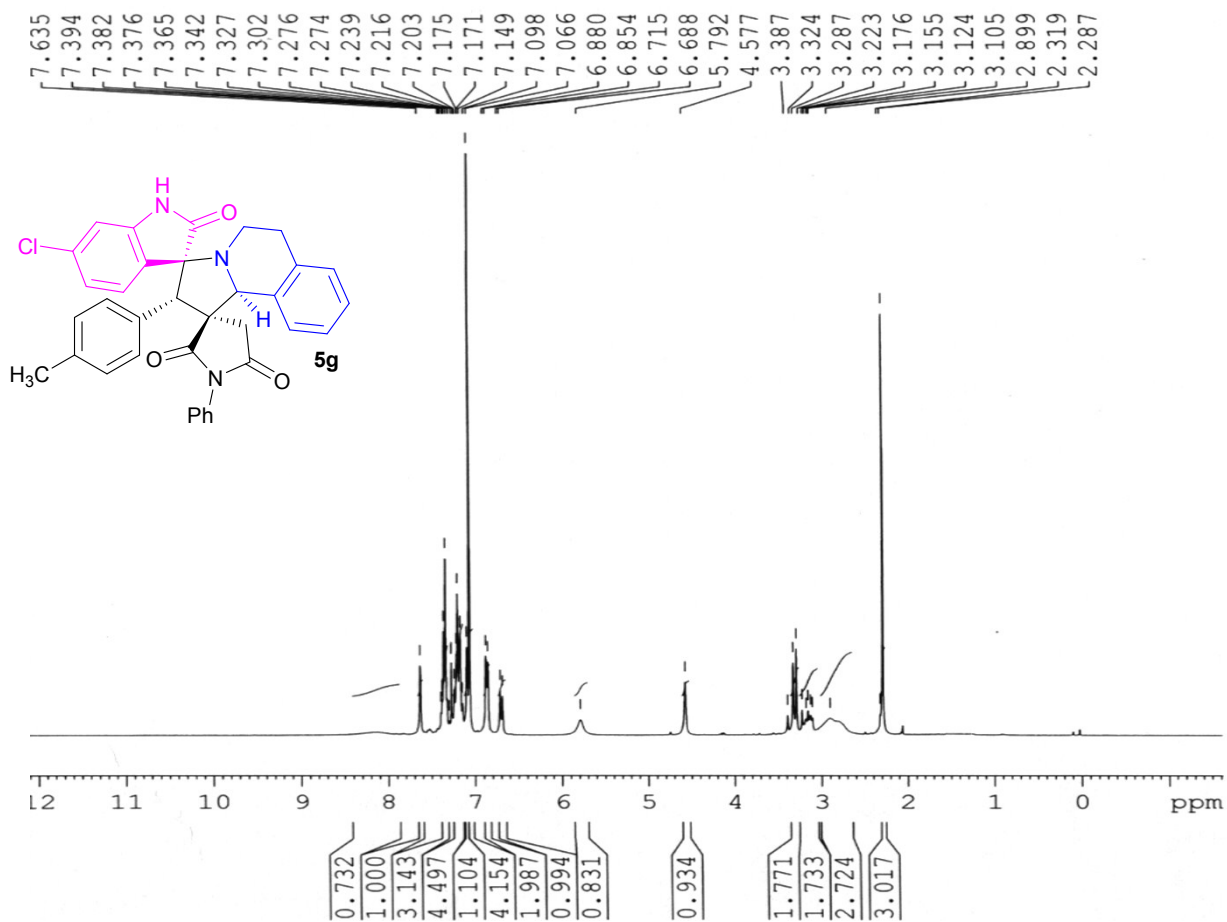

**Fig. S25.** <sup>1</sup>H NMR spectrum of **5g** in CDCl<sub>3</sub>

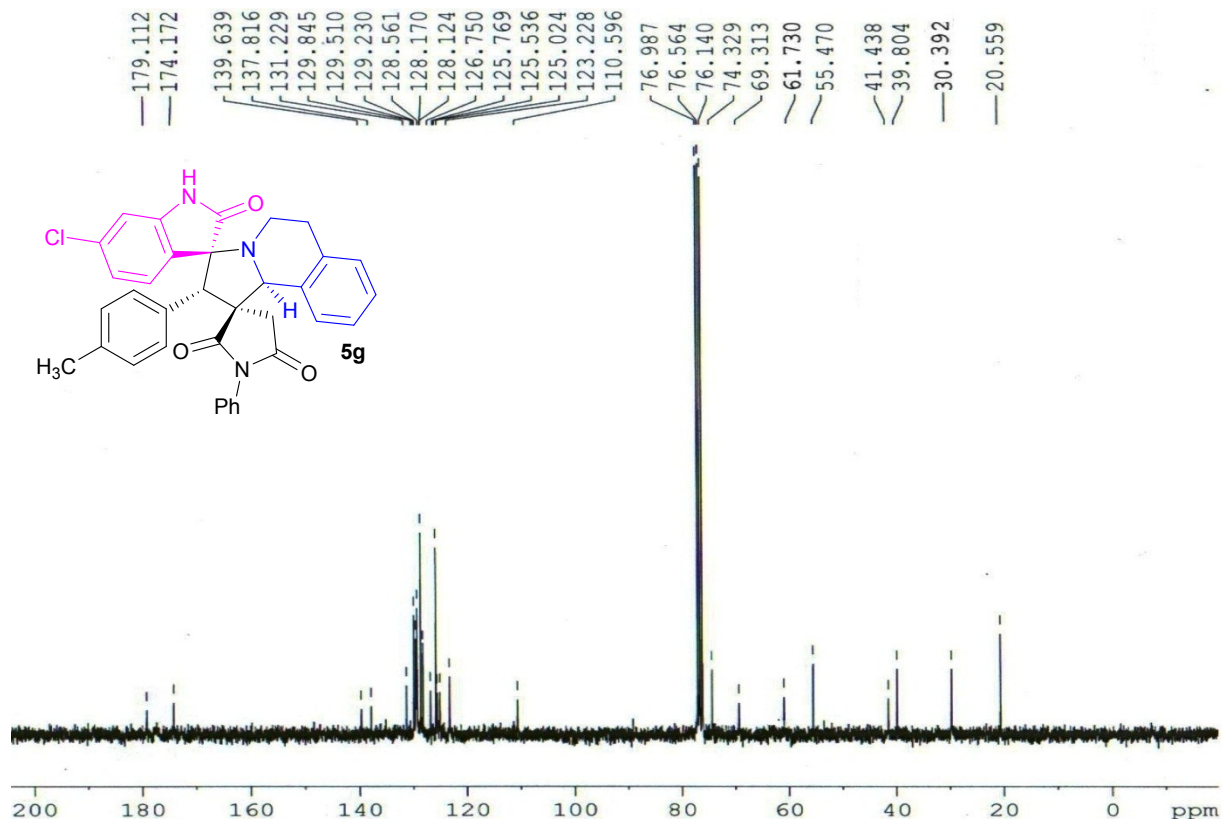

**Fig. S26.** <sup>13</sup>C NMR spectrum of **5g** in CDCl<sub>3</sub>

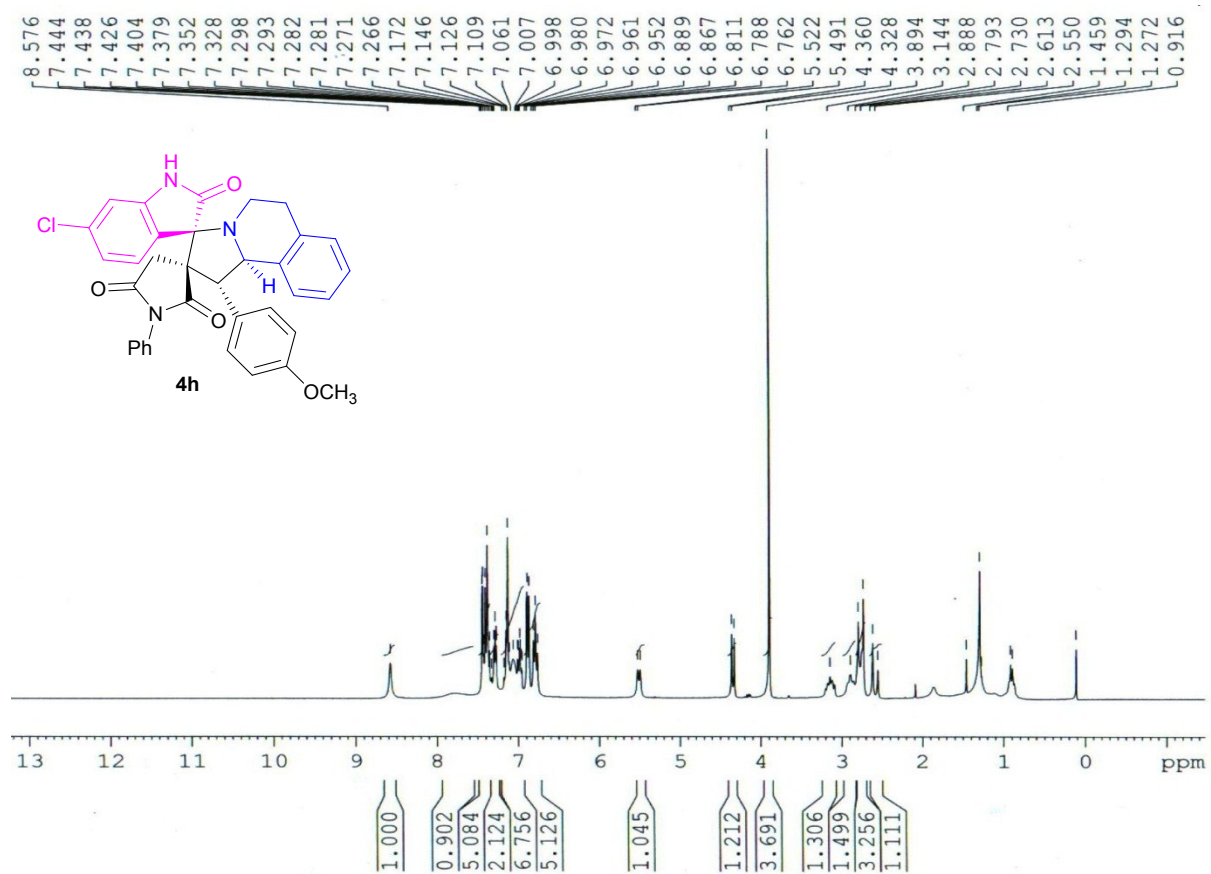

**Fig. S27.** <sup>1</sup>H NMR spectrum of **4h** in CDCl<sub>3</sub>

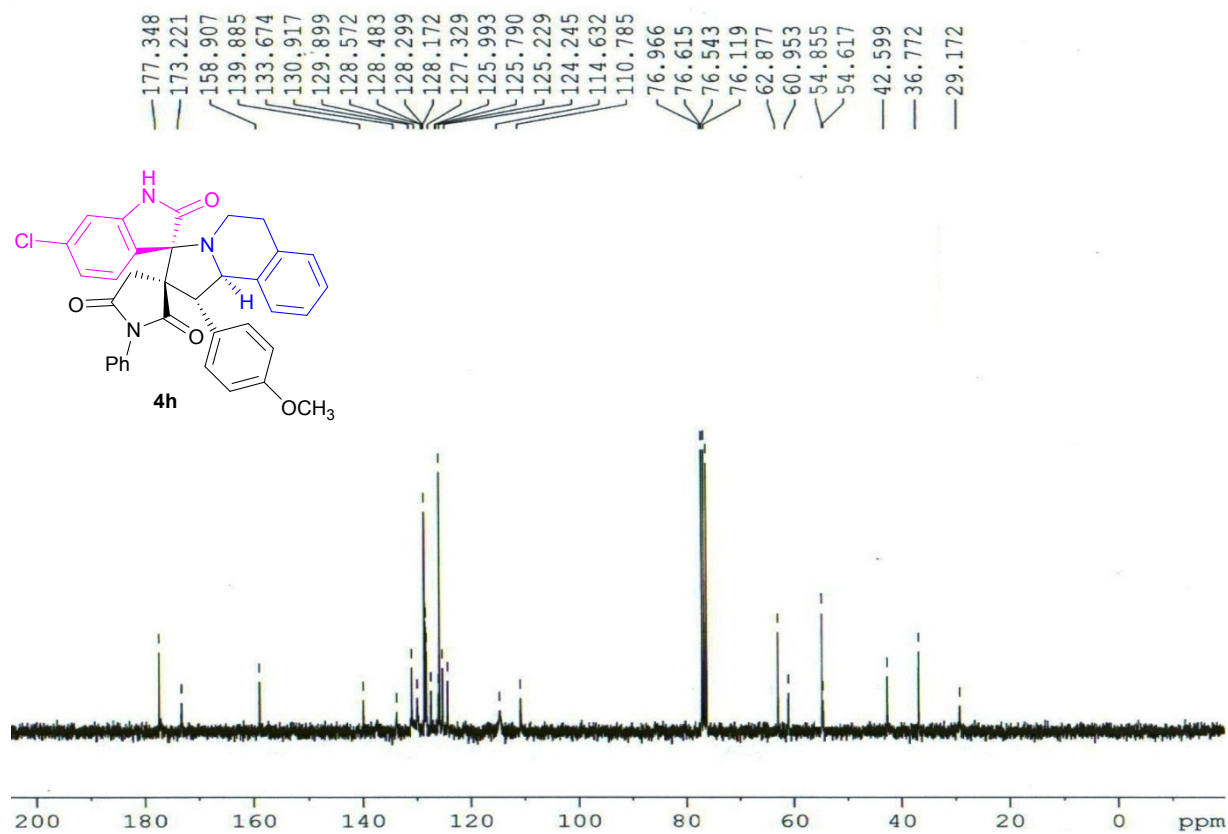

**Fig. S28.** <sup>13</sup>C NMR spectrum of **4h** in CDCl<sub>3</sub>

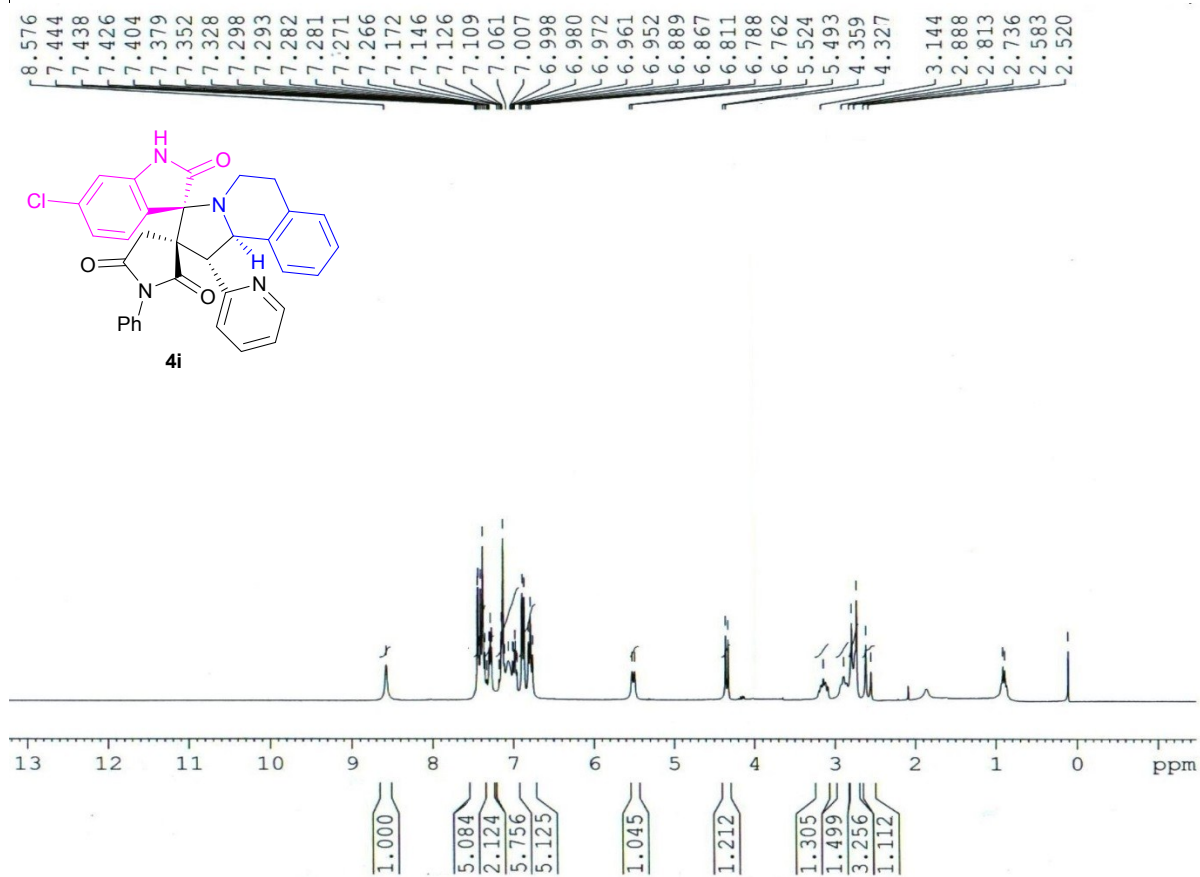

**Fig. S29.** <sup>1</sup>H NMR spectrum of **4i** in CDCl<sub>3</sub>

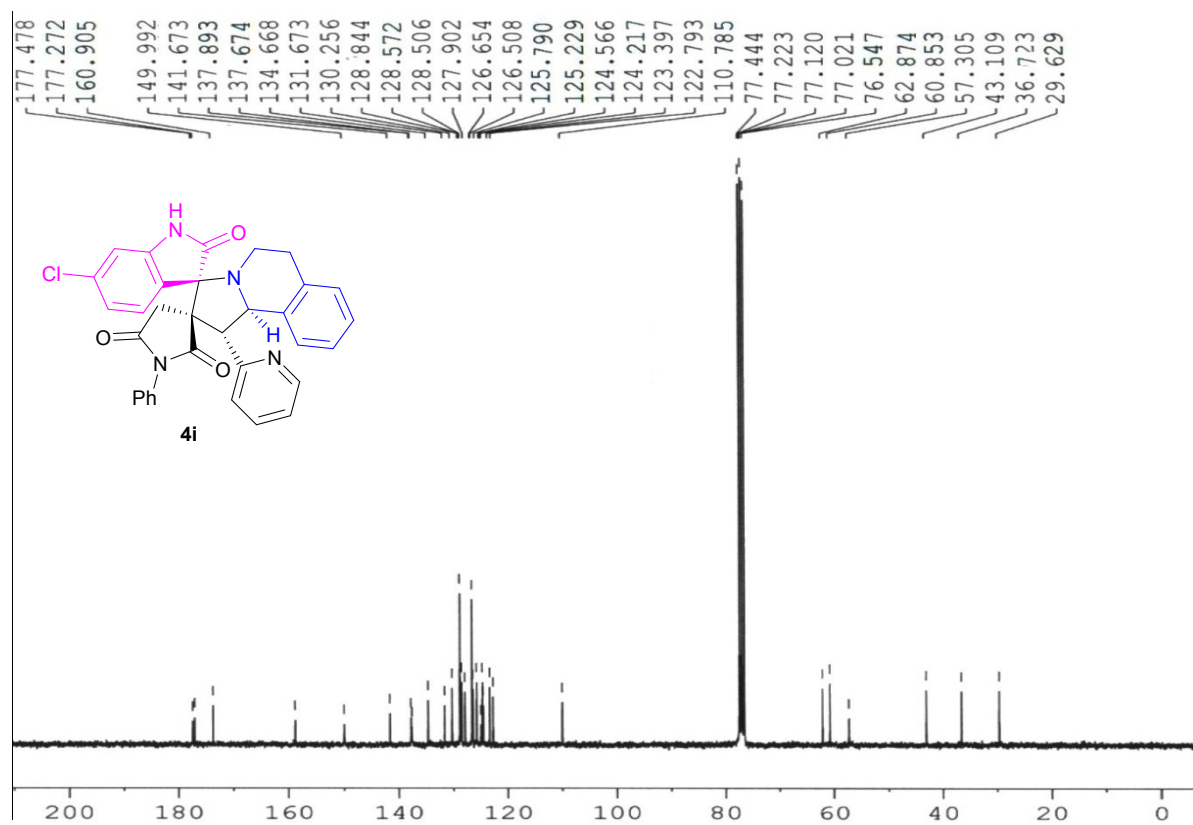

**Fig. S30.** <sup>13</sup>C NMR spectrum of **4i** in CDCl<sub>3</sub>

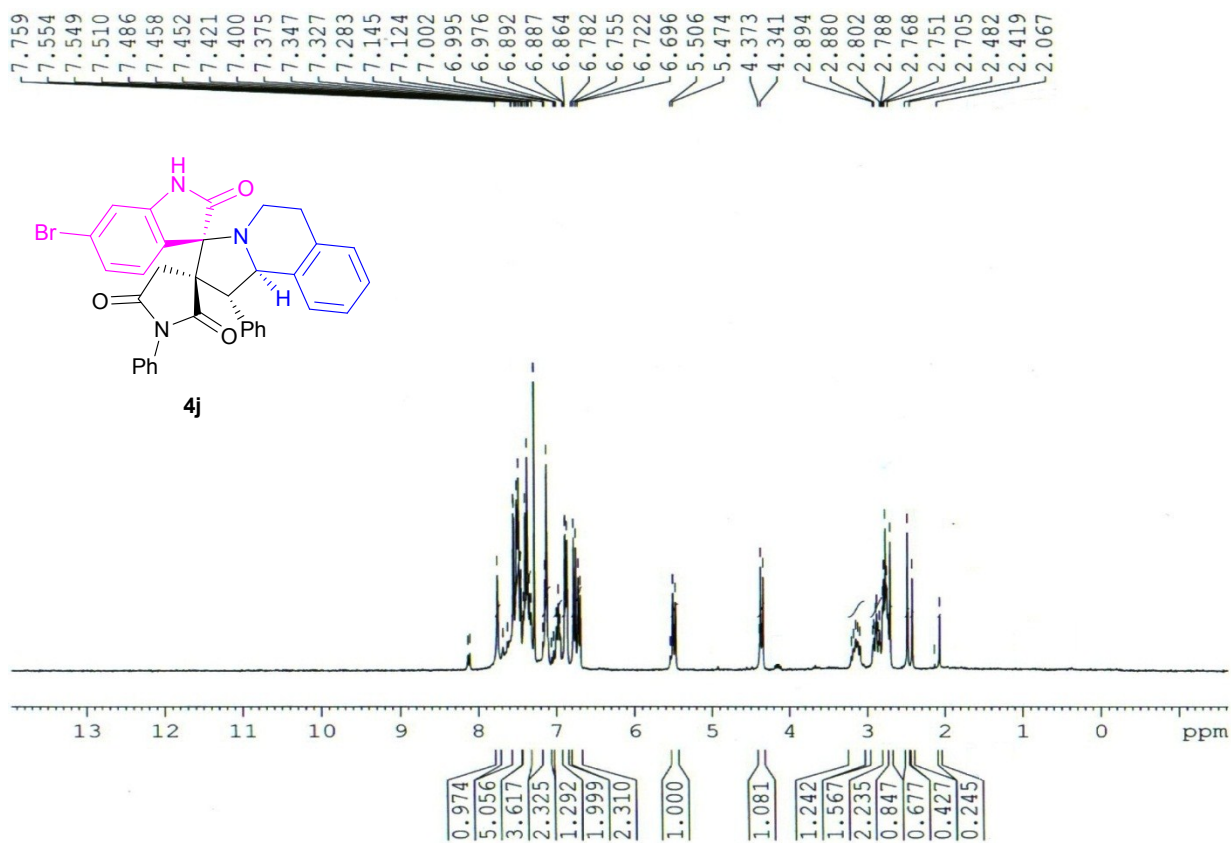

**Fig. S31.** <sup>1</sup>H NMR spectrum of **4j** in CDCl<sub>3</sub>

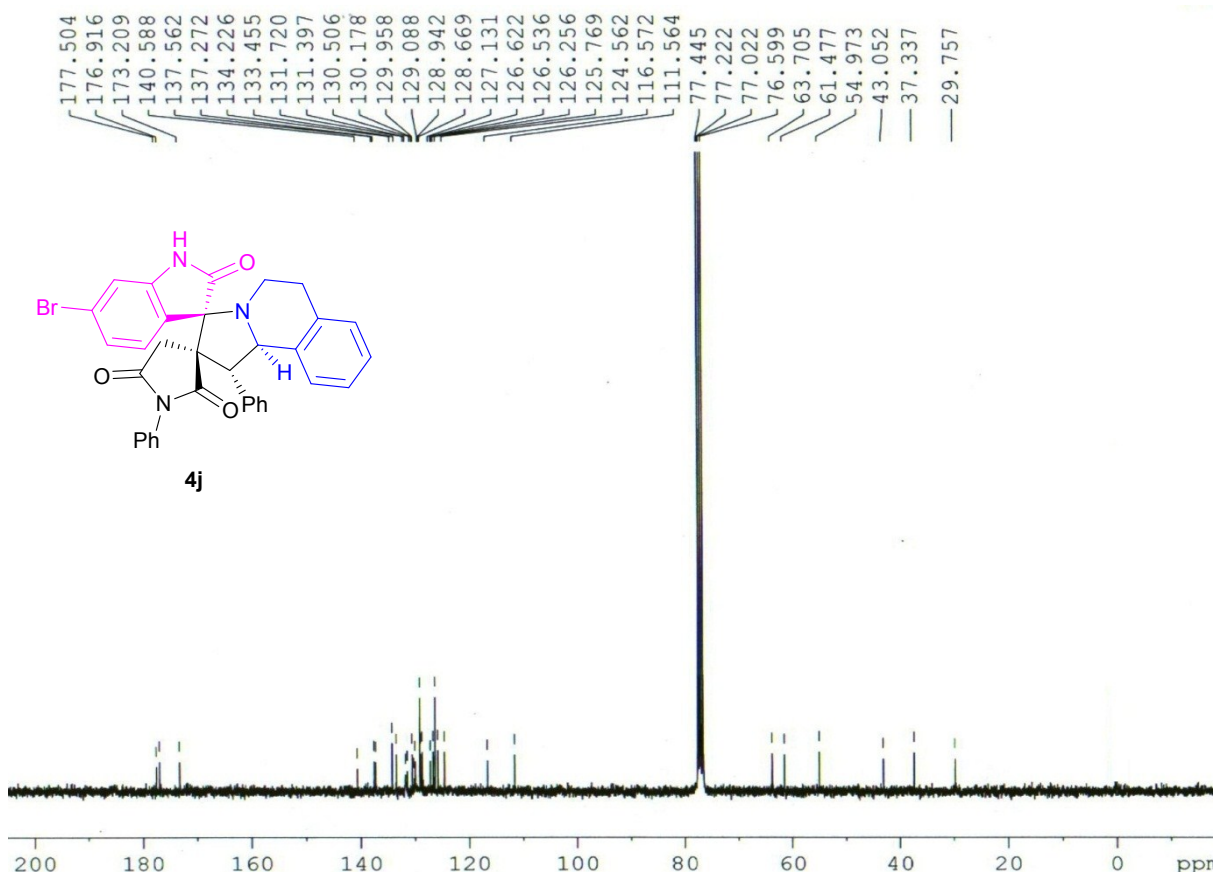

**Fig. S32.** <sup>13</sup>C NMR spectrum of **4j** in CDCl<sub>3</sub>

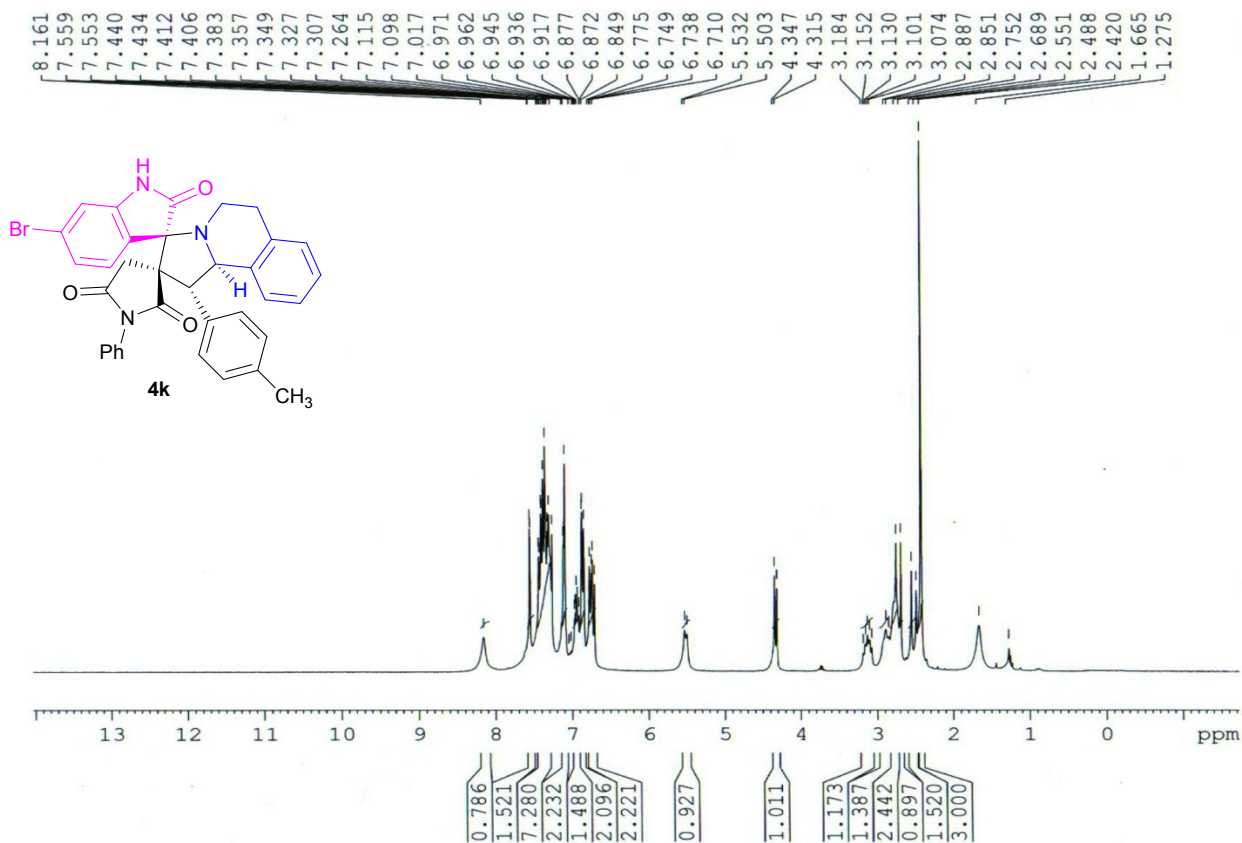

**Fig. S33.** <sup>1</sup>H NMR spectrum of **4k** in CDCl<sub>3</sub>

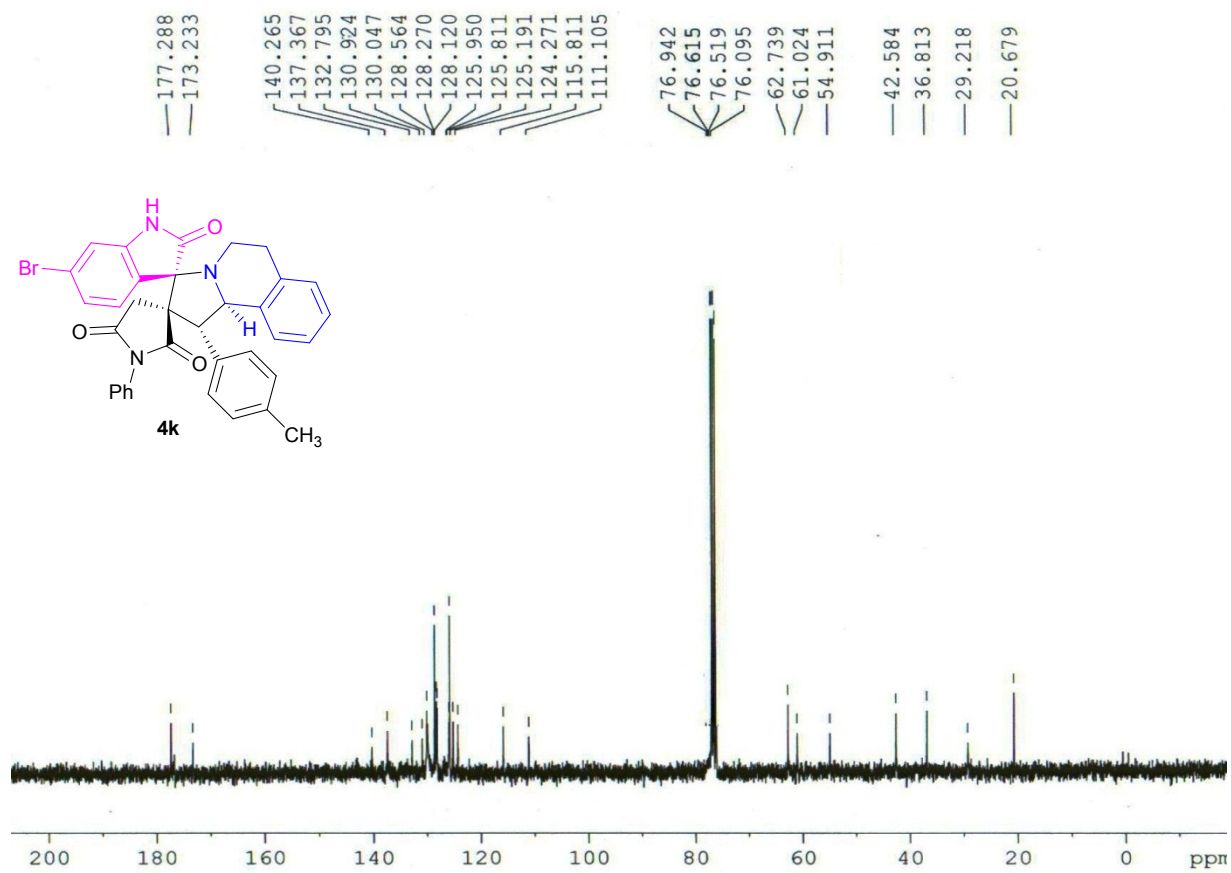

**Fig. S34.** <sup>13</sup>C NMR spectrum of **4k** in CDCl<sub>3</sub>



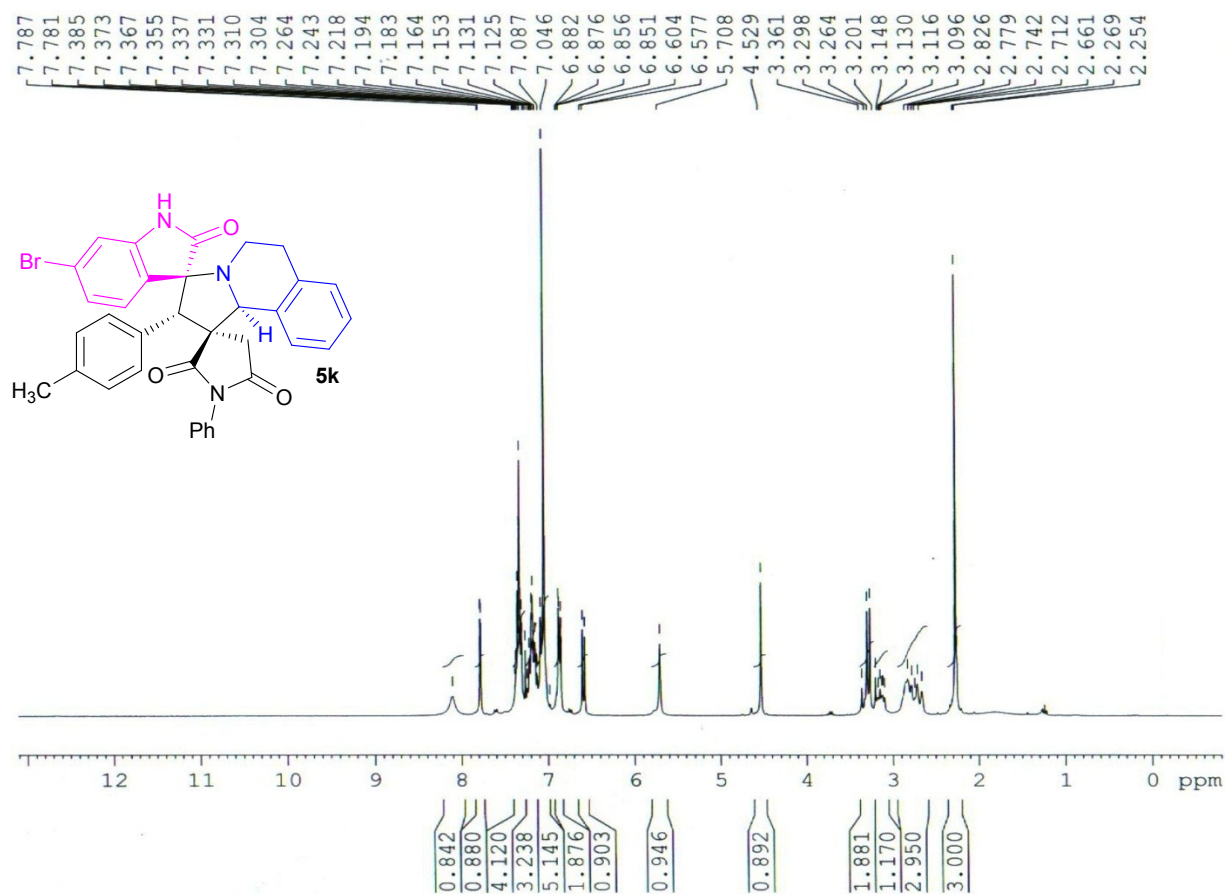

**Fig. S35.** <sup>1</sup>H NMR spectrum of **5k** in CDCl<sub>3</sub>

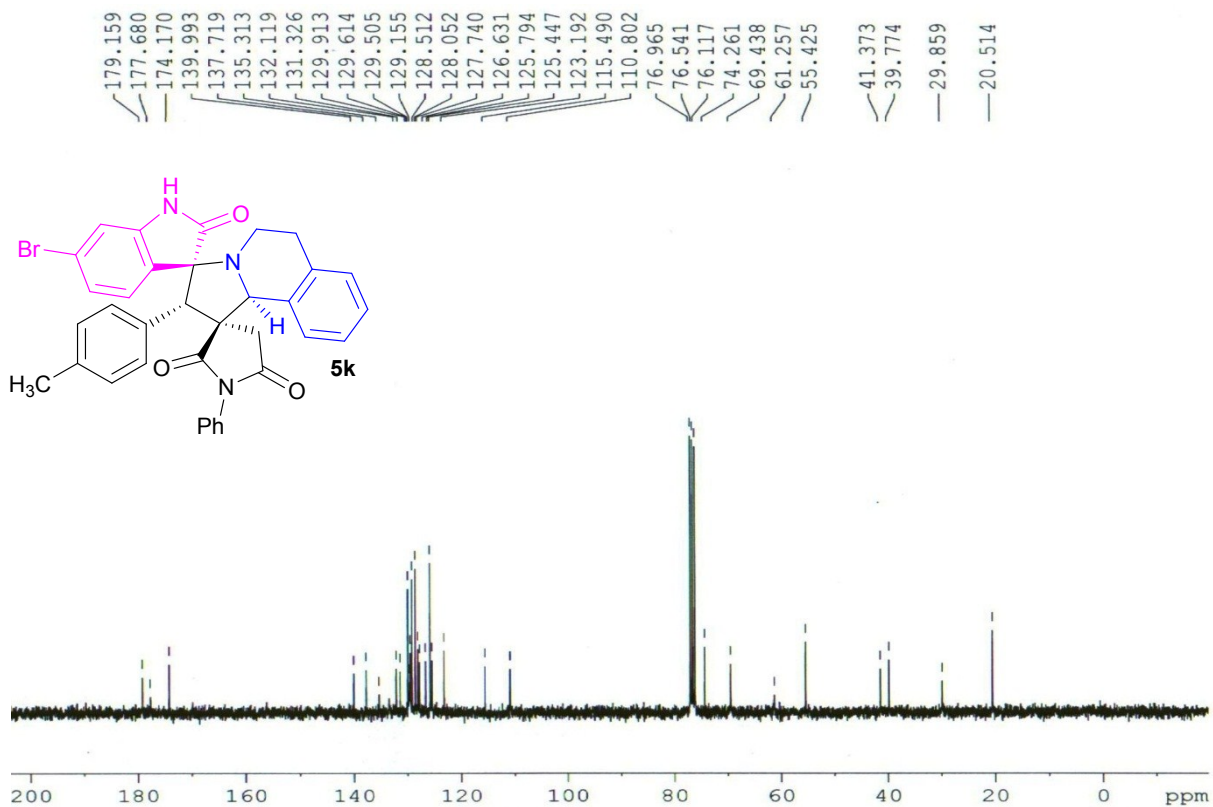

**Fig. S36.** <sup>13</sup>C NMR spectrum of **5k** in CDCl<sub>3</sub>

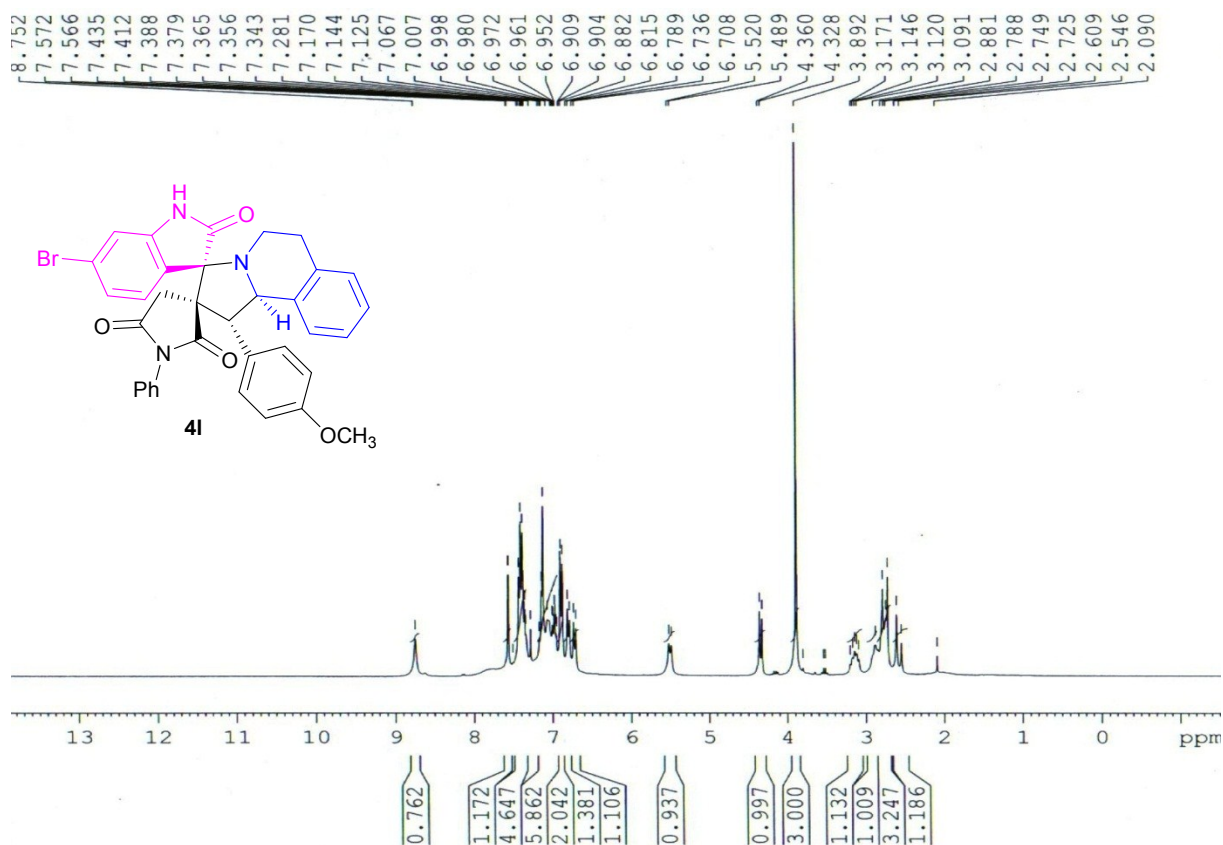

**Fig. S37.** <sup>1</sup>H NMR spectrum of **4l** in CDCl<sub>3</sub>

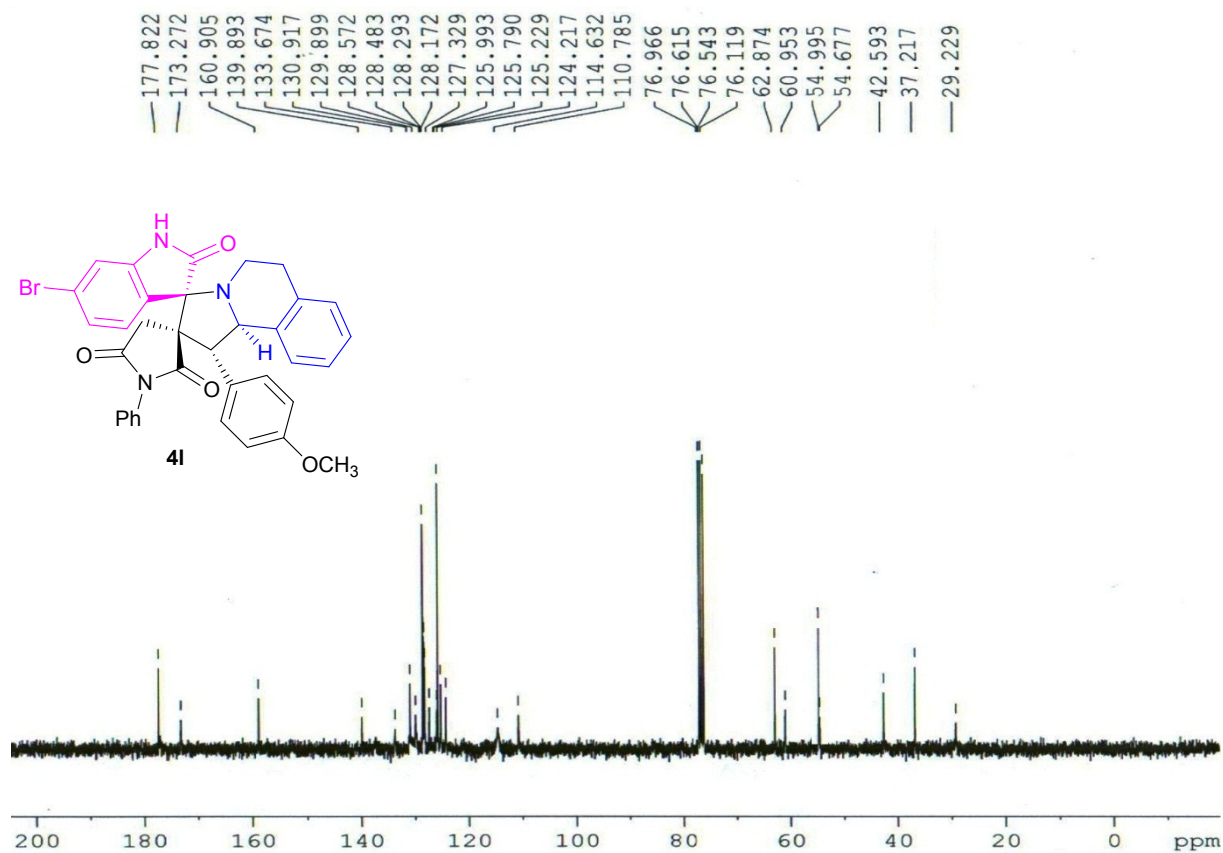

**Fig. S38.** <sup>13</sup>C NMR spectrum of **4l** in CDCl<sub>3</sub>

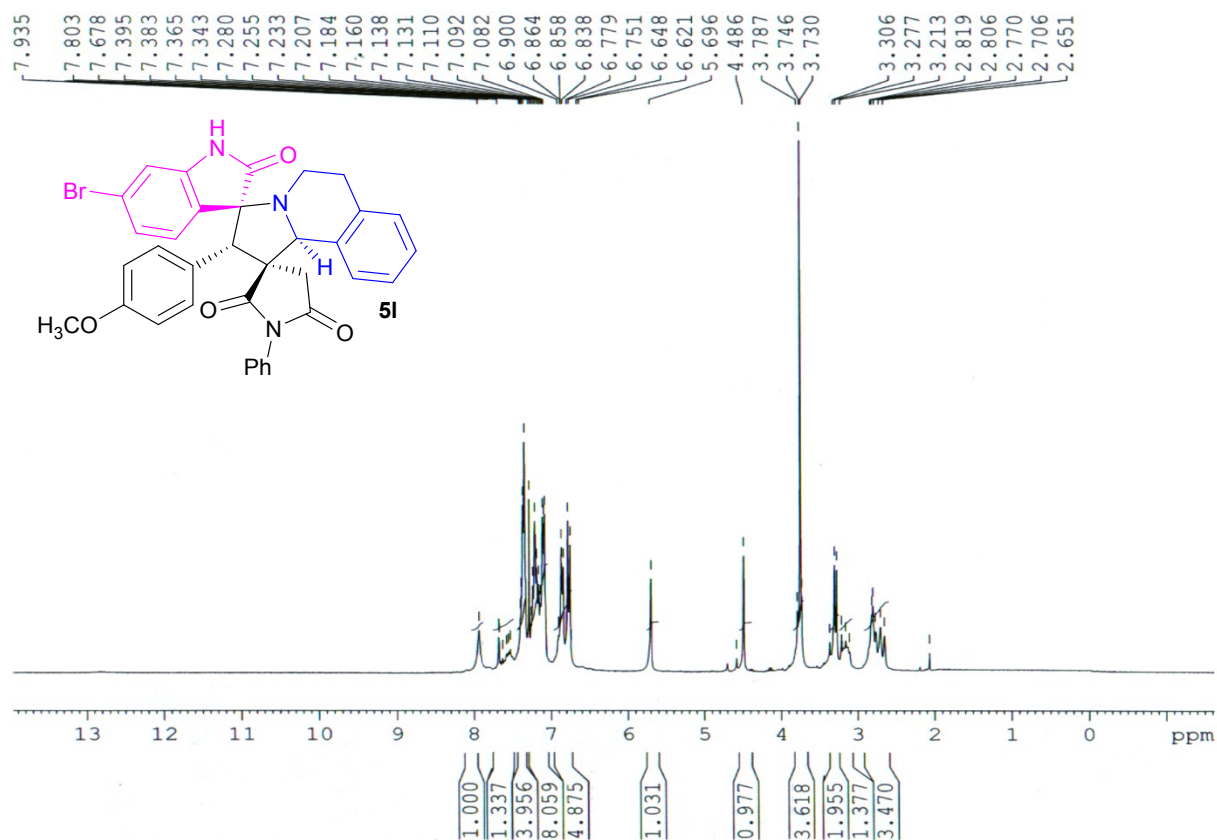

**Fig. S39.** <sup>1</sup>H NMR spectrum of **5l** in CDCl<sub>3</sub>

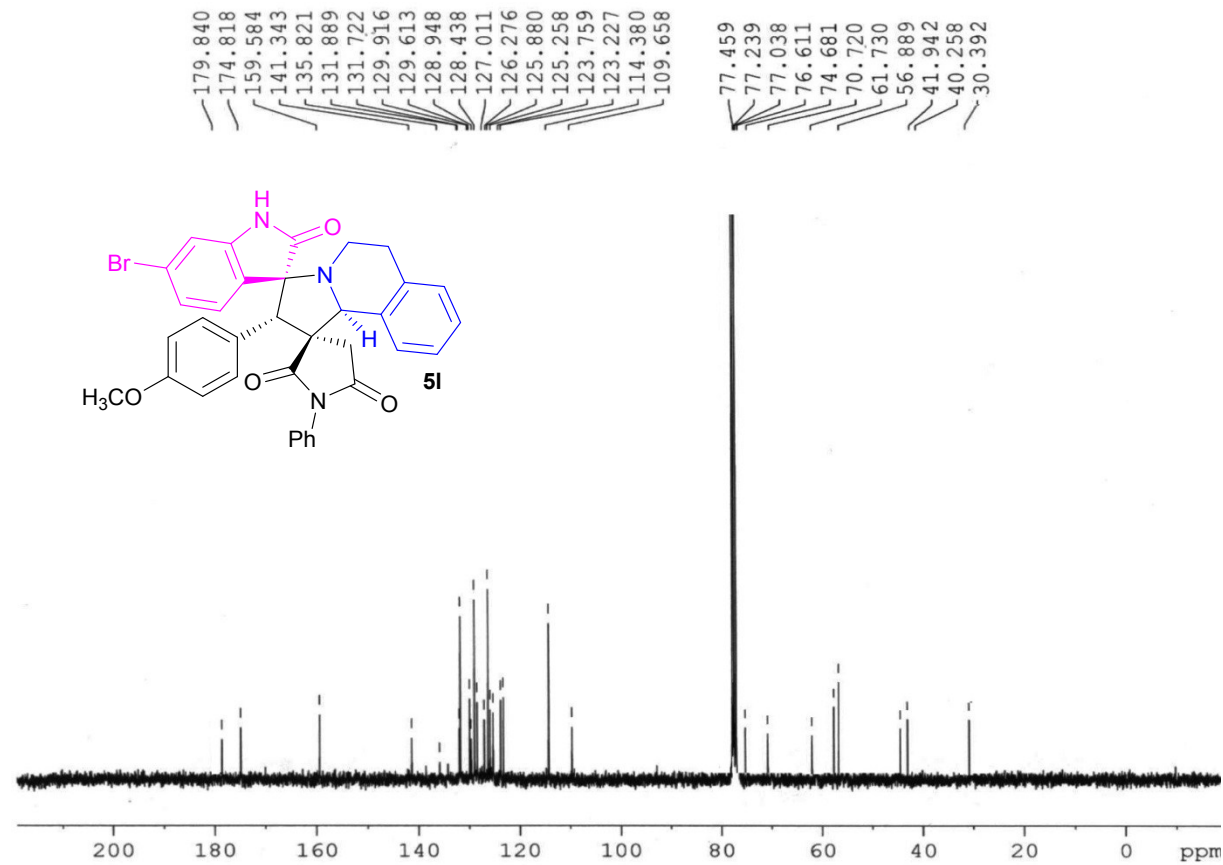

**Fig. S40.** <sup>13</sup>C NMR spectrum of **5l** in CDCl<sub>3</sub>

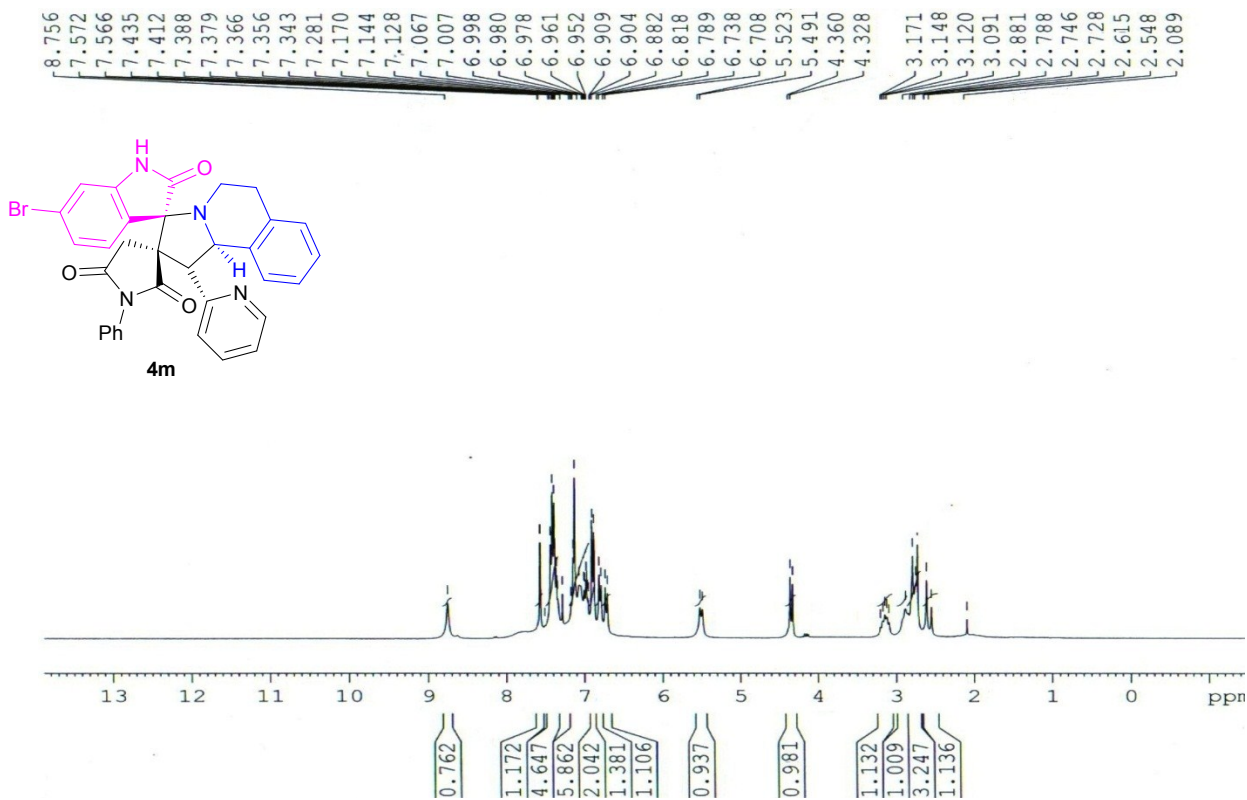

**Fig. S41.** <sup>1</sup>H NMR spectrum of **4m** in CDCl<sub>3</sub>

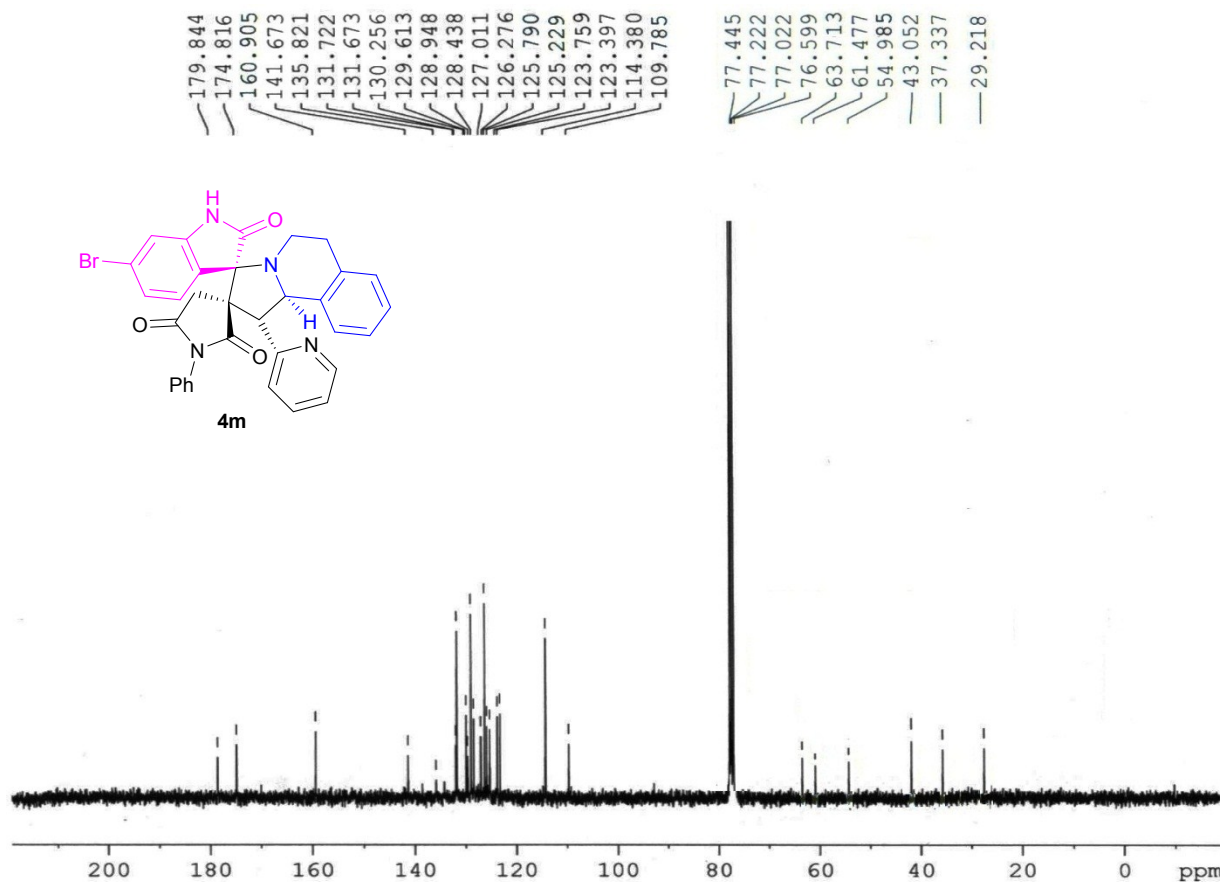

**Fig. S42.** <sup>13</sup>C NMR spectrum of **4m** in CDCl<sub>3</sub>

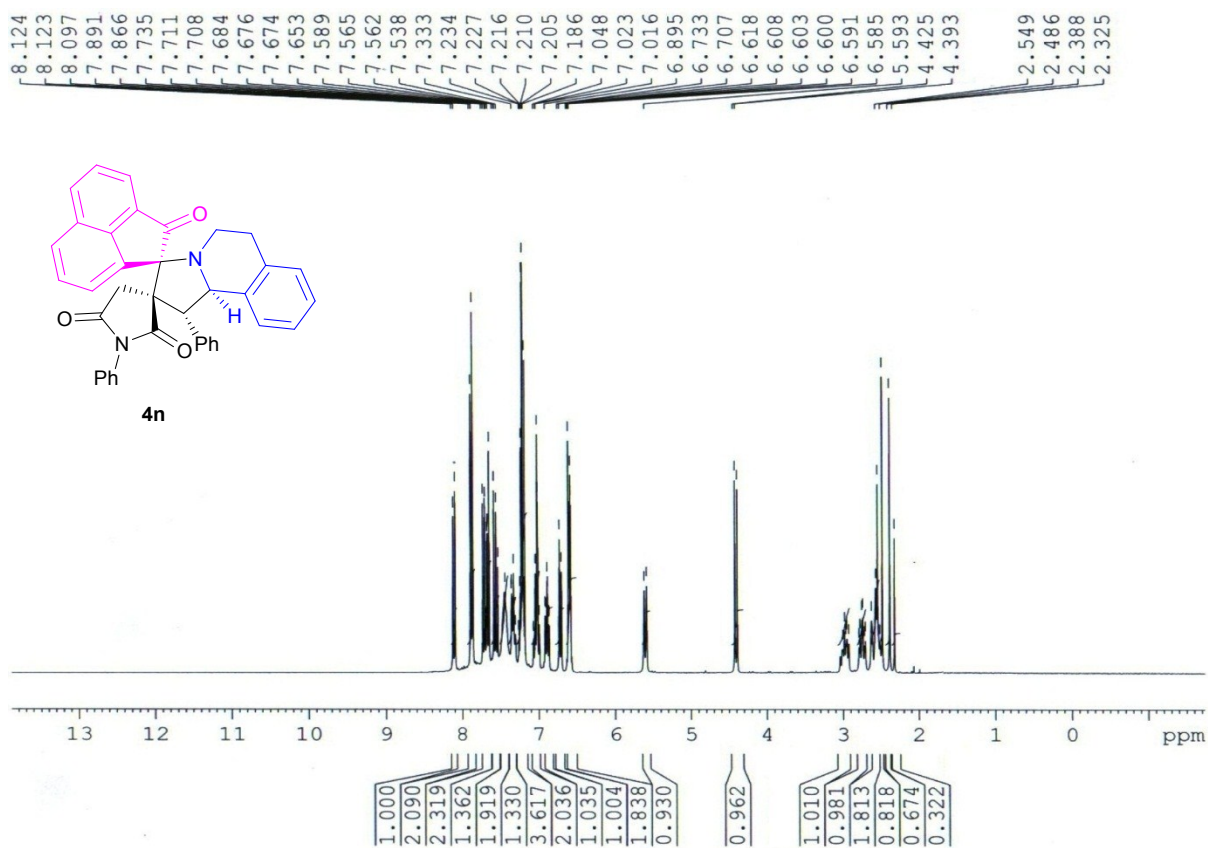

**Fig. S43.** <sup>1</sup>H NMR spectrum of **4n** in CDCl<sub>3</sub>

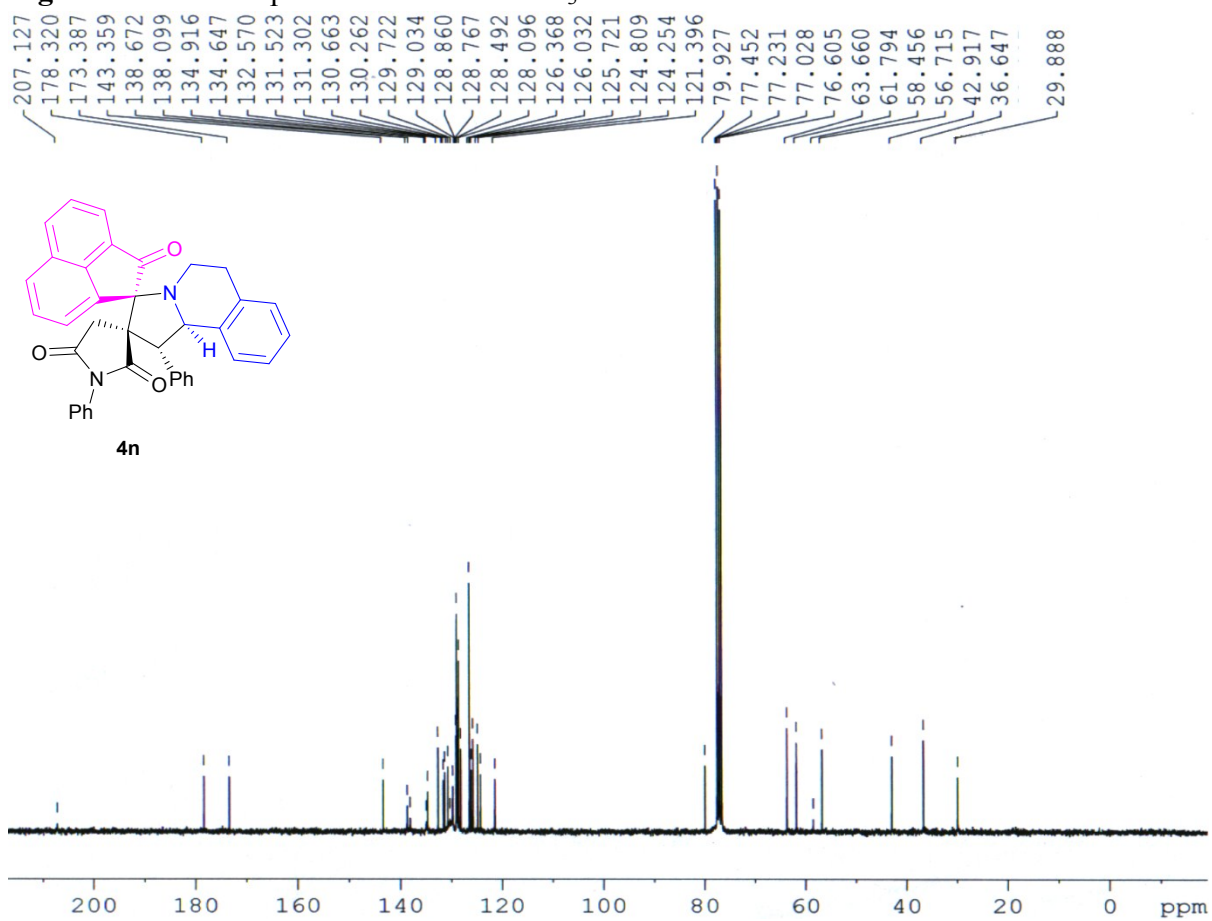

**Fig. S44.** <sup>13</sup>C NMR spectrum of **4n** in CDCl<sub>3</sub>

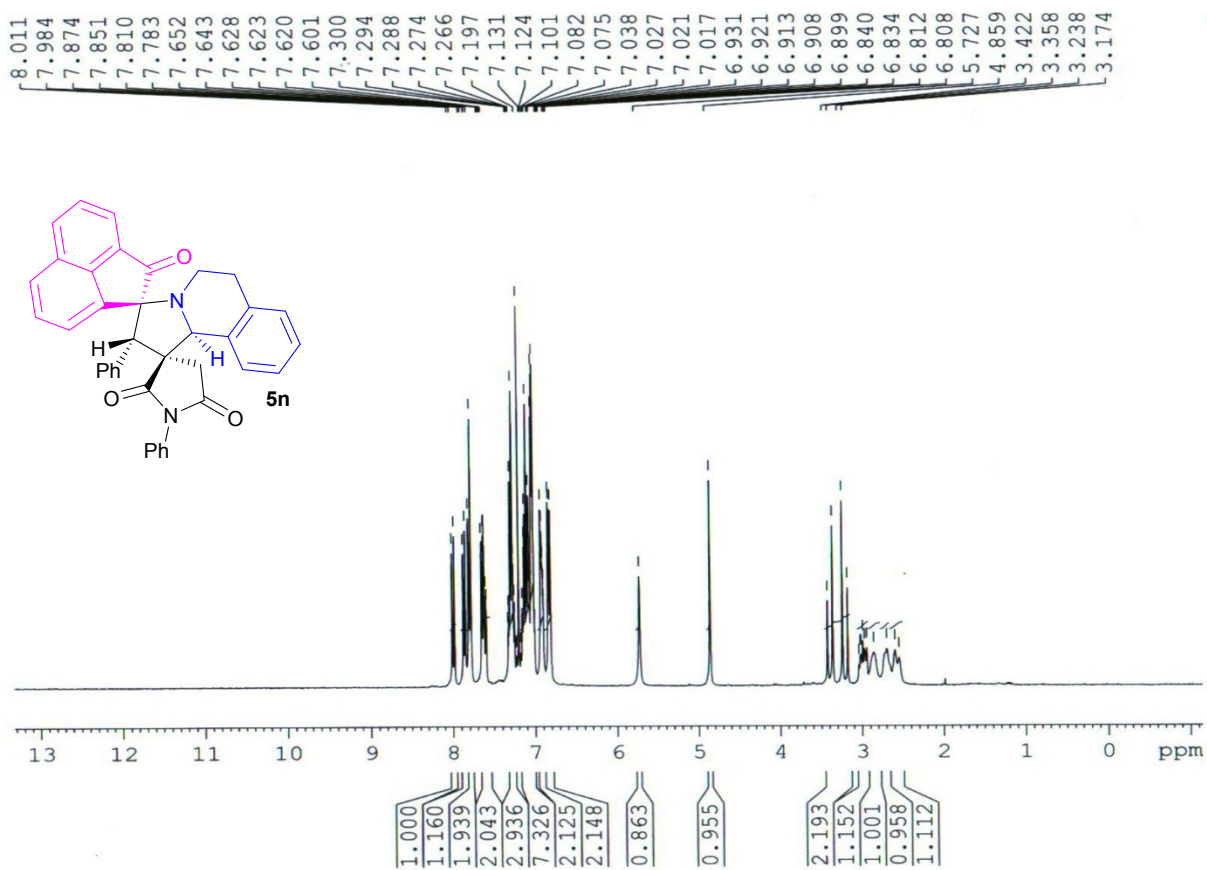

**Fig. S45.** <sup>1</sup>H NMR spectrum of **5n** in CDCl<sub>3</sub>

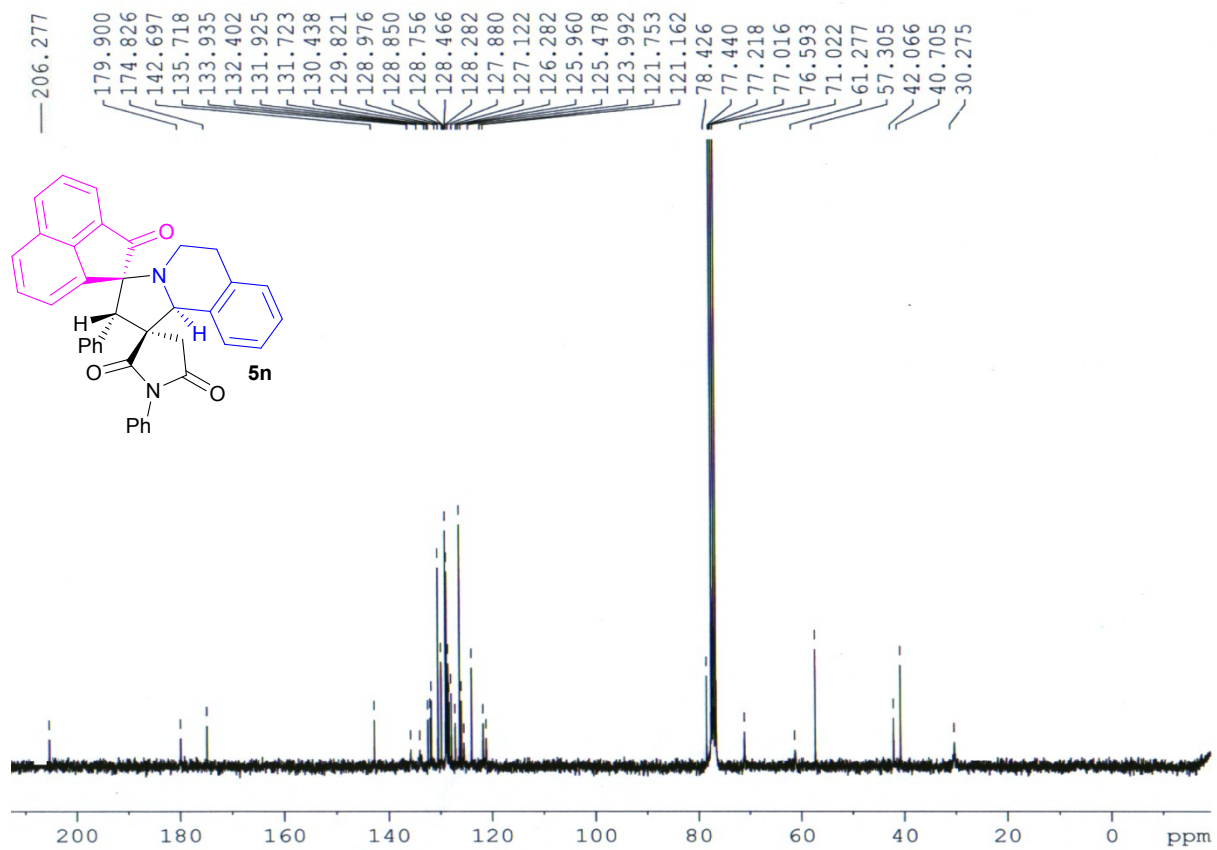

Fig. S46.  $^{13}\text{C}$  NMR spectrum of **5n** in  $\text{CDCl}_3$

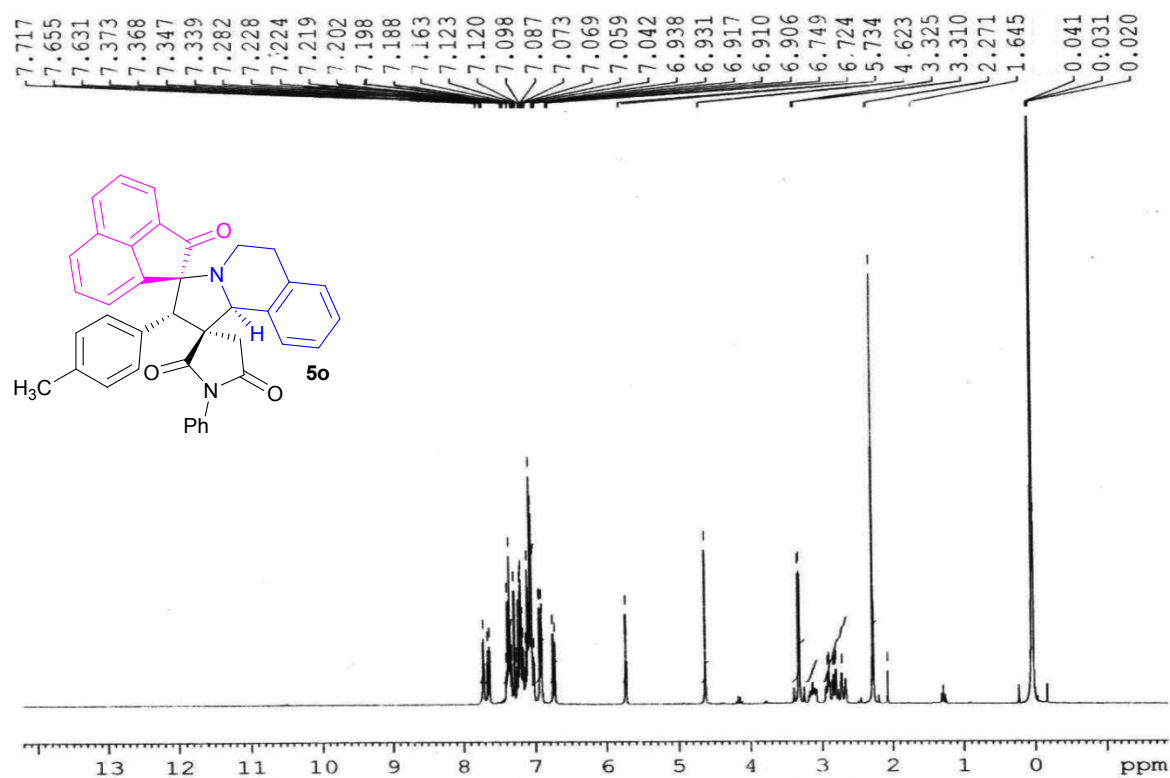

Fig. S47.  $^1\text{H}$  NMR spectrum of **5o** in  $\text{CDCl}_3$

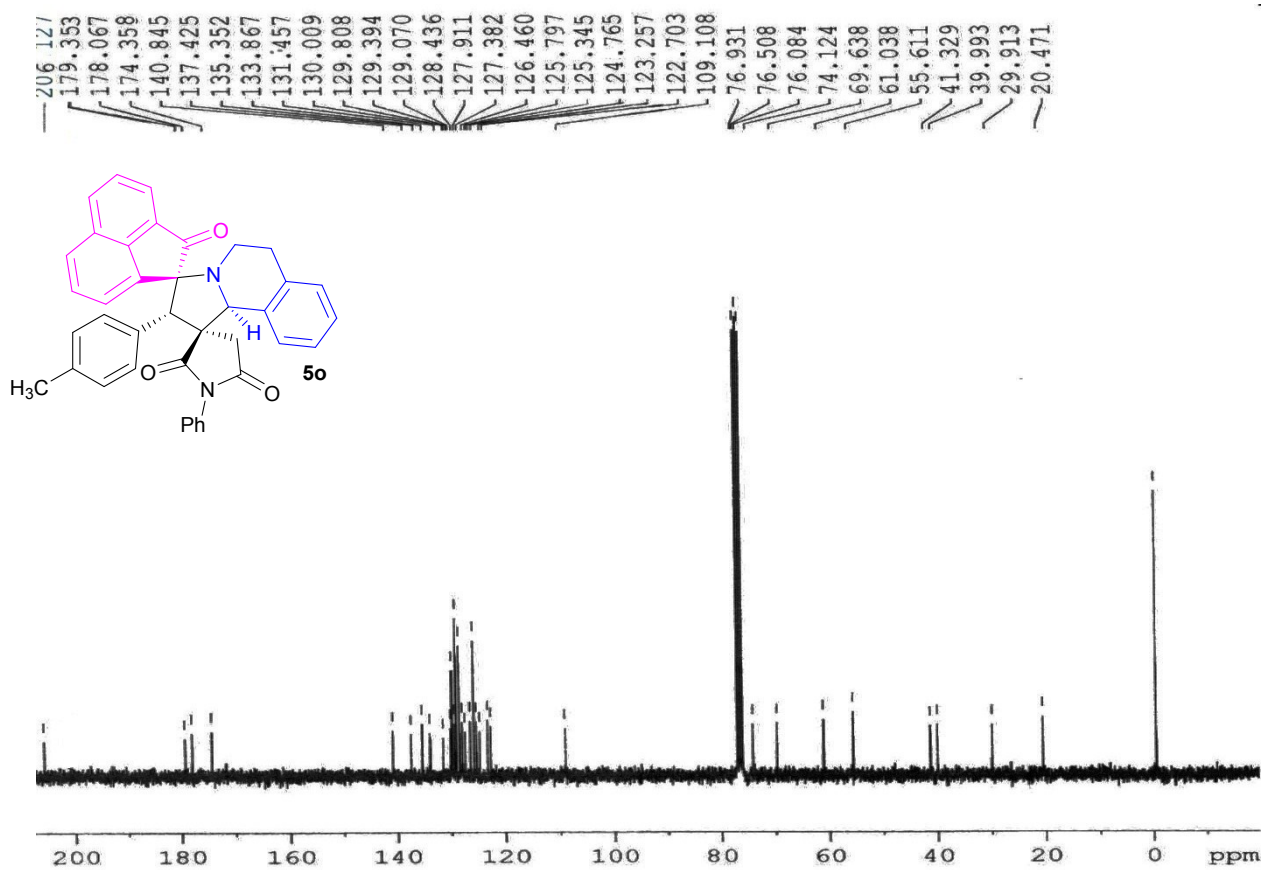

**Fig. S48.**  $^{13}\text{C}$  NMR spectrum of **5o** in  $\text{CDCl}_3$

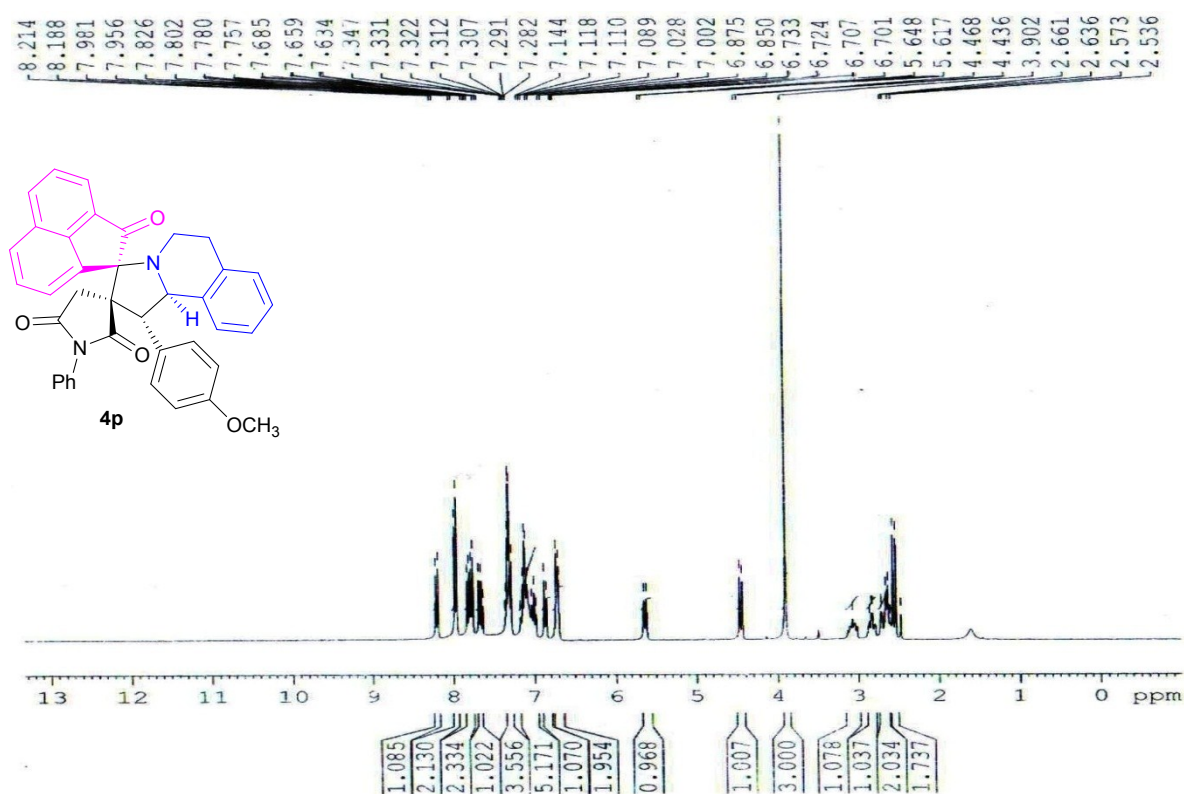

**Fig. S49.**  $^1\text{H}$  NMR spectrum of **4p** in  $\text{CDCl}_3$

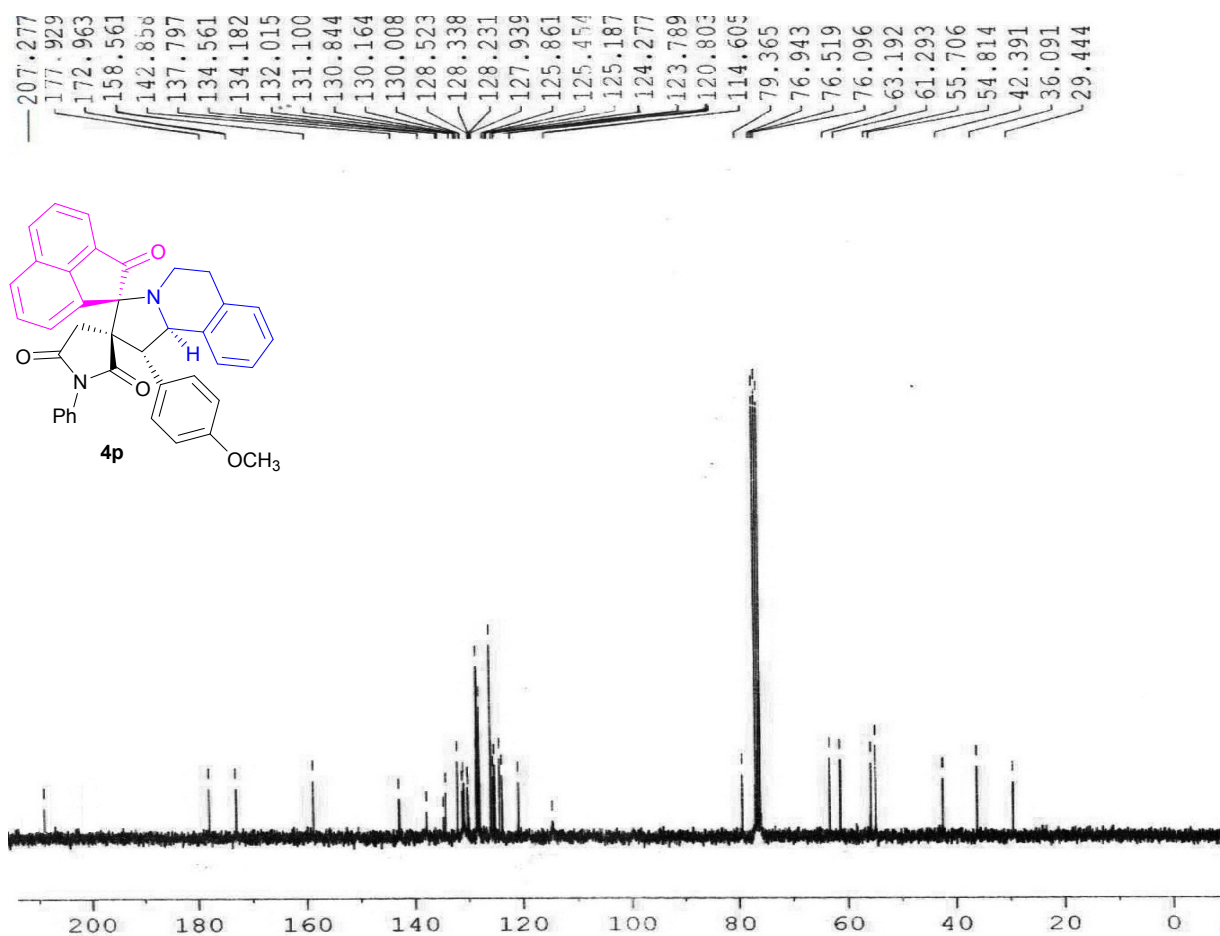



Fig. S50.  $^{13}\text{C}$  NMR spectrum of **4p** in  $\text{CDCl}_3$

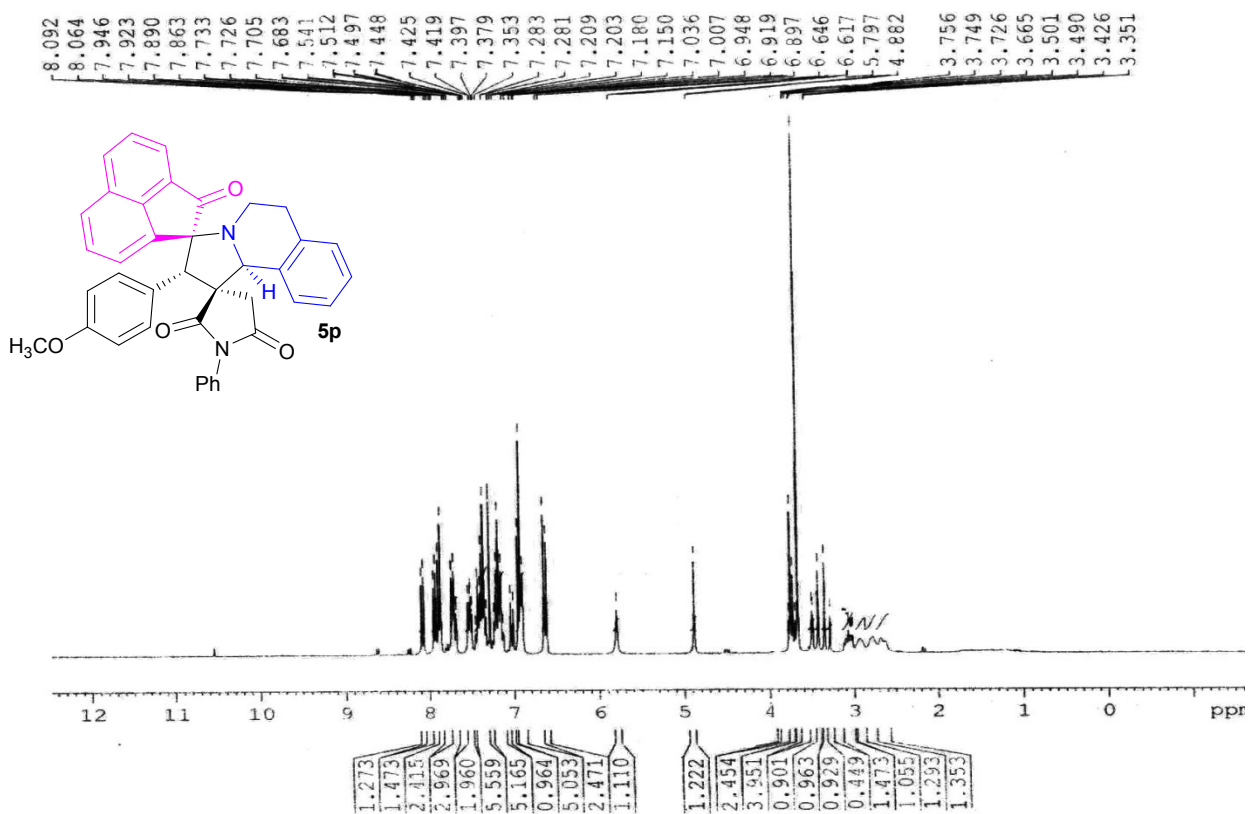

Fig. S51.  $^1\text{H}$  NMR spectrum of **5p** in  $\text{CDCl}_3$

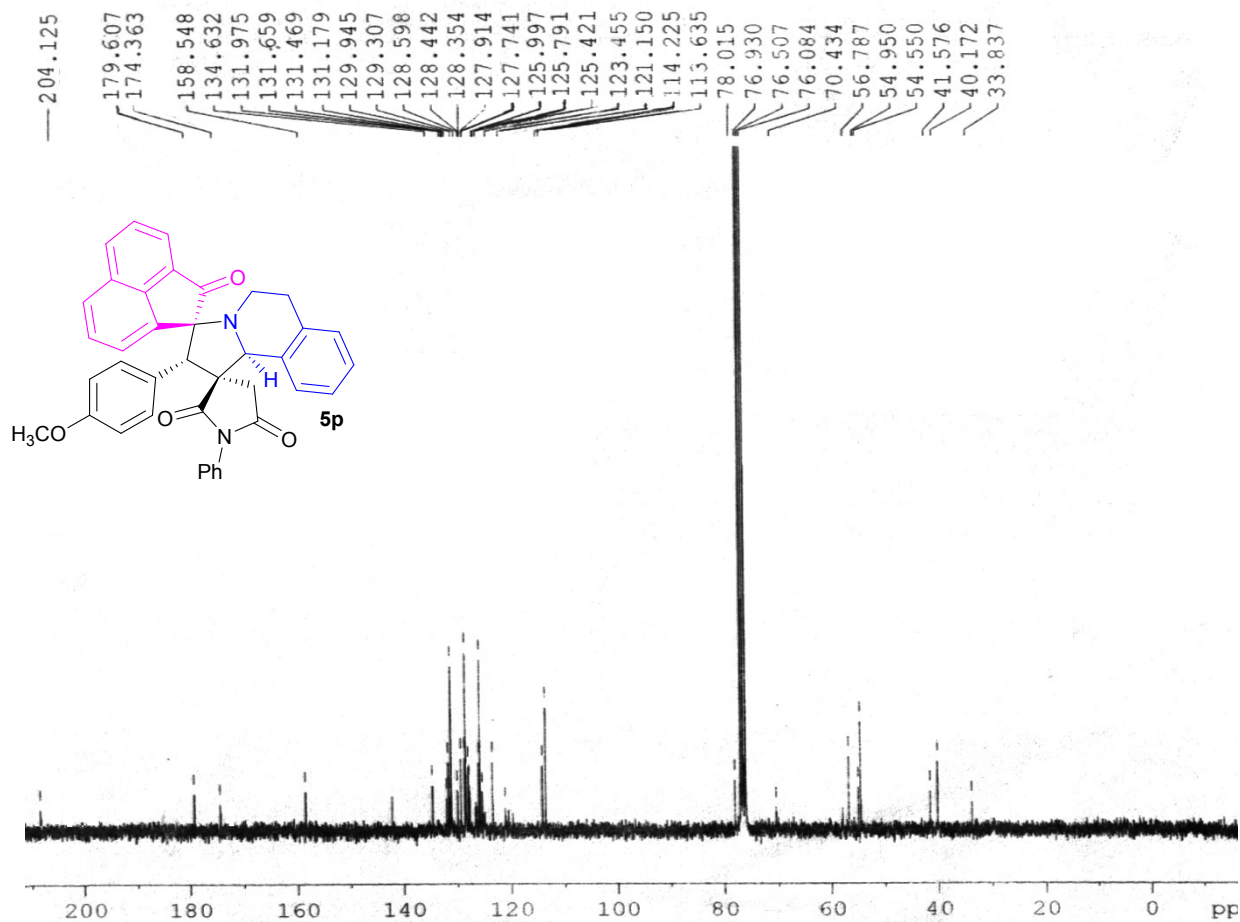

**Fig. S52.**  $^{13}\text{C}$  NMR spectrum of **5p** in  $\text{CDCl}_3$

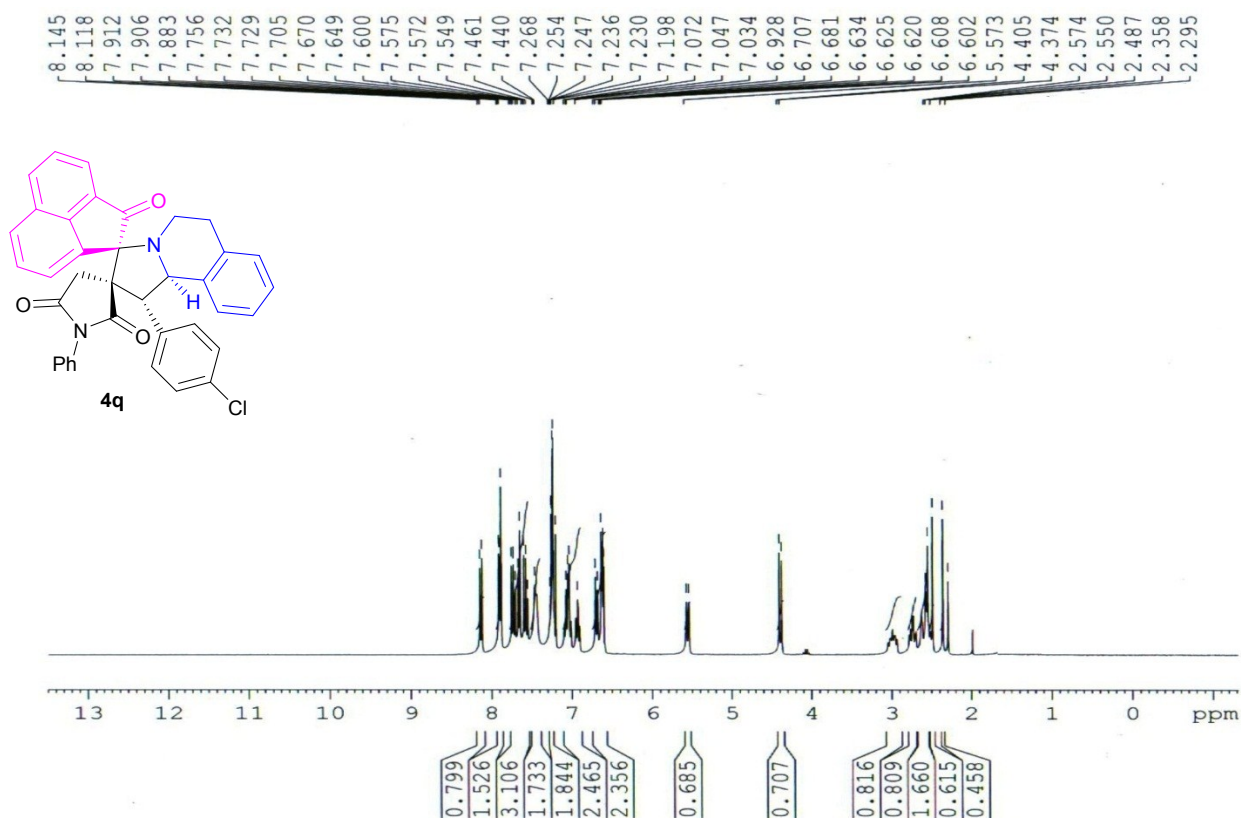

**Fig. S53.**  $^1\text{H}$  NMR spectrum of **4q** in  $\text{CDCl}_3$

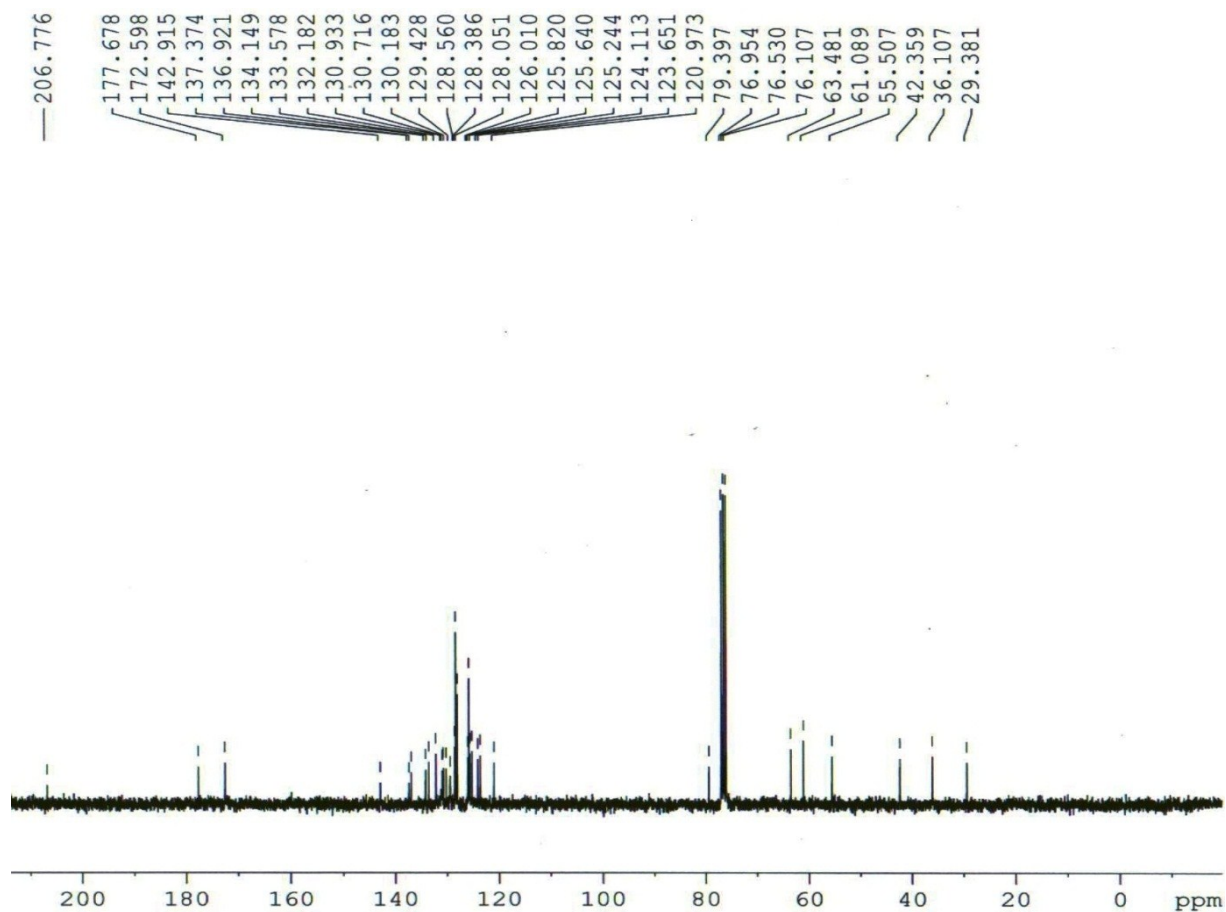

**Fig. S54.**  $^{13}\text{C}$  NMR spectrum of **4q** in  $\text{CDCl}_3$

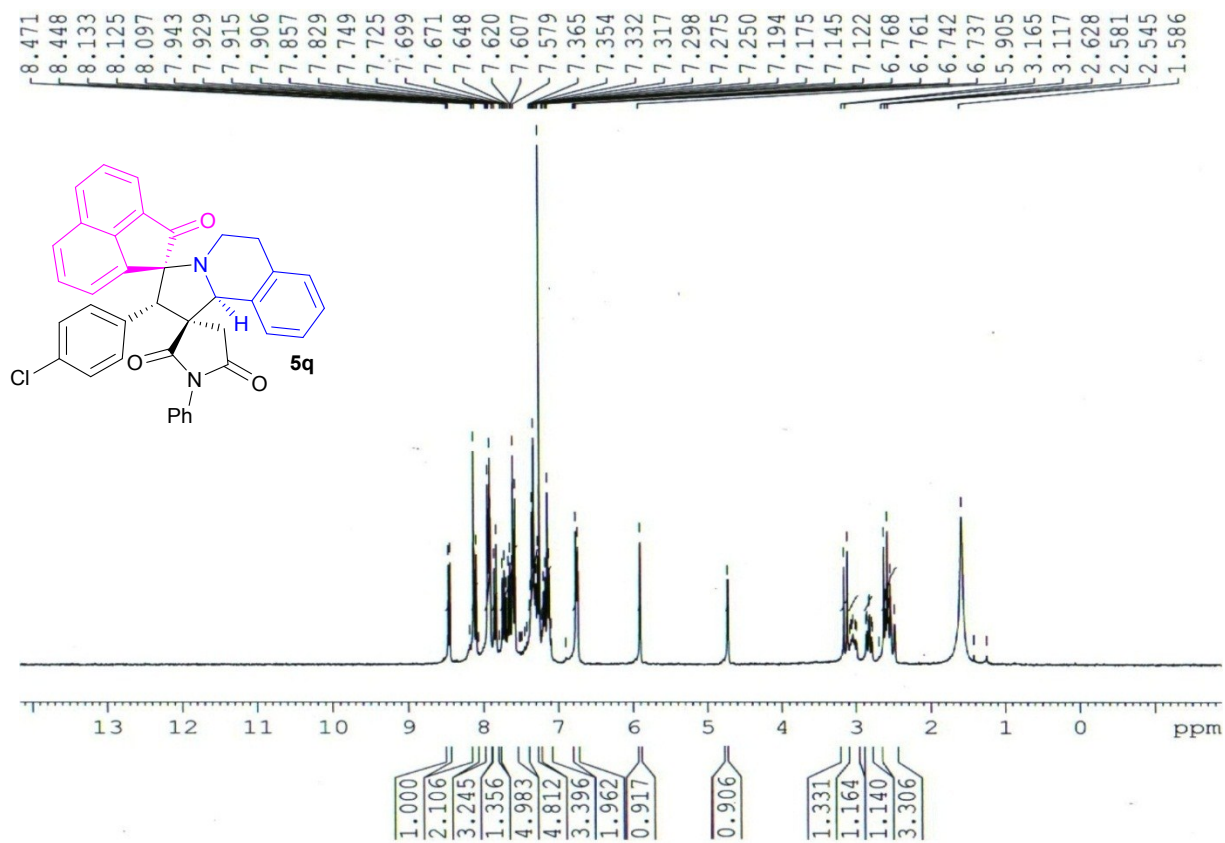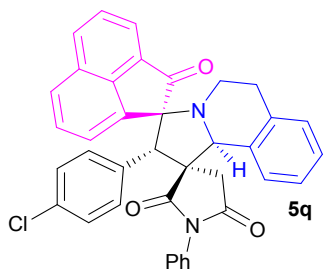

**Fig. S55.**  $^1\text{H}$  NMR spectrum of **5q** in  $\text{CDCl}_3$

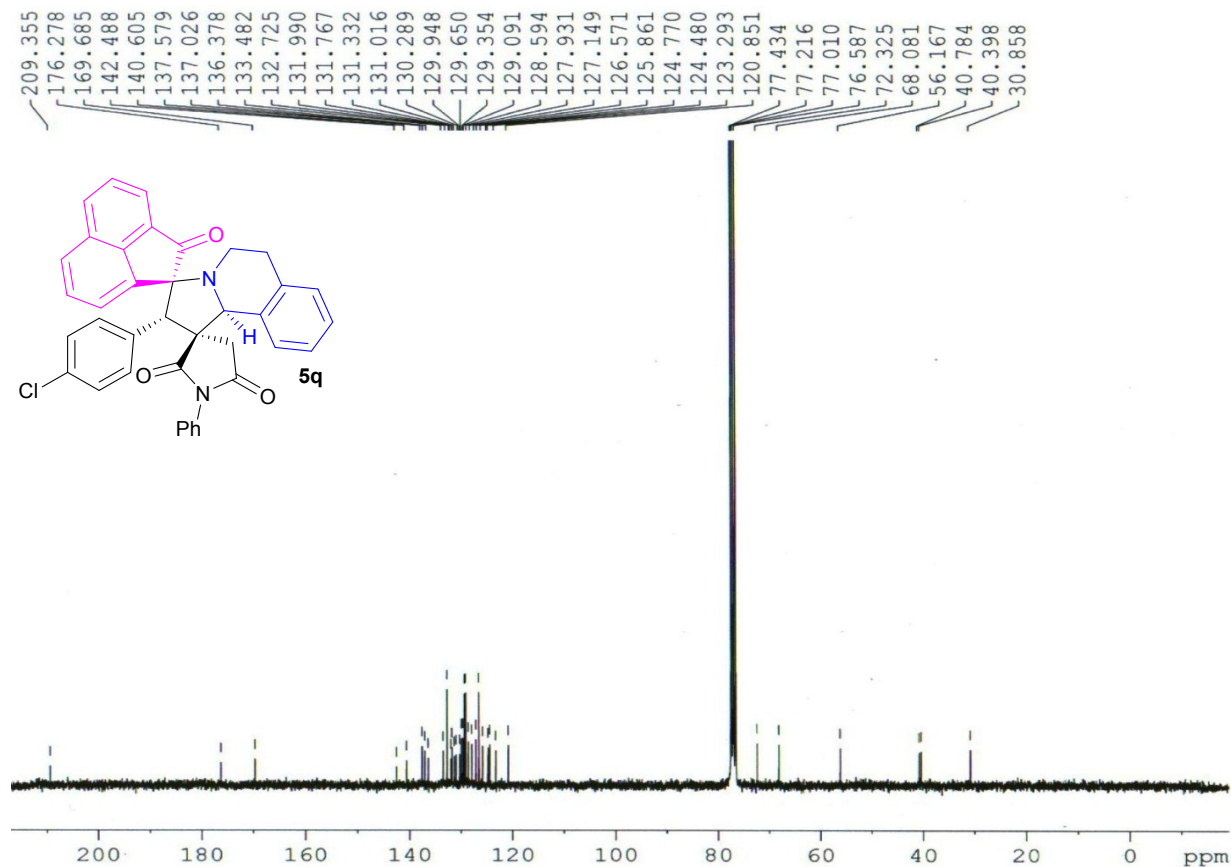

**Fig. S56.**  $^{13}\text{C}$  NMR spectrum of **5q** in  $\text{CDCl}_3$

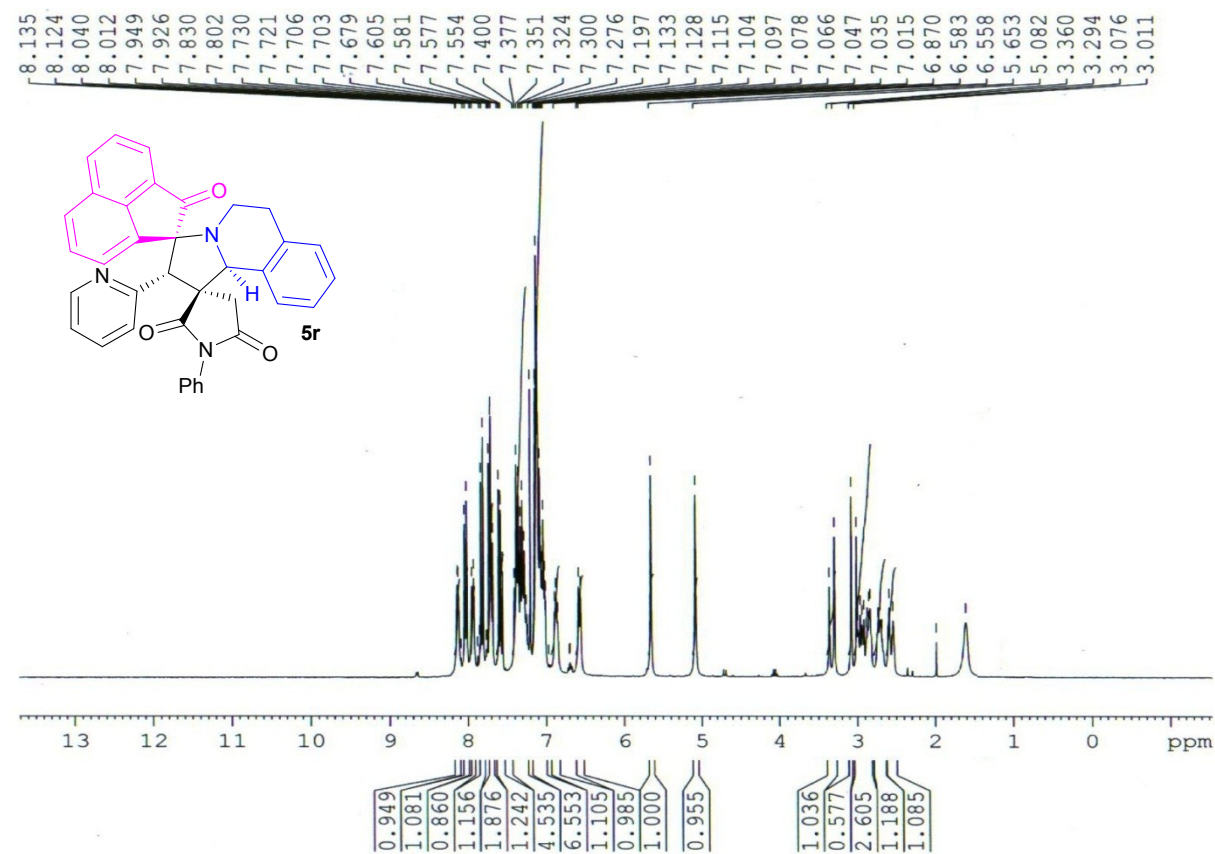

**Fig. S57.**  $^1\text{H}$  NMR spectrum of **5r** in  $\text{CDCl}_3$

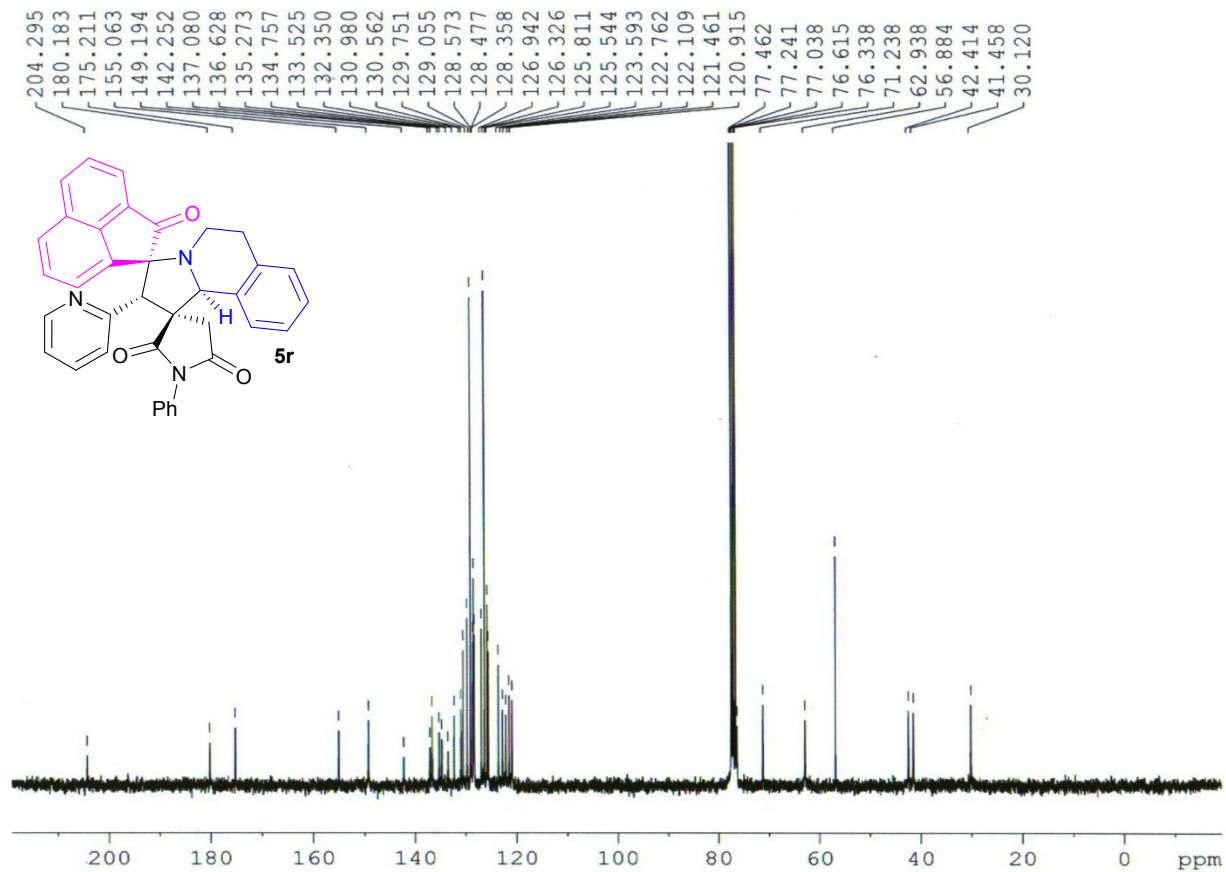

**Fig. S58.**  $^{13}\text{C}$  NMR spectrum of **5r** in  $\text{CDCl}_3$
